# Supplementary material for: Copper-catalyzed dehydrogenative cyclization/alkenylation towards dihydroquinolinones
Source: Royal Society of Chemistry journal article supplement (doi:10.1039/d4ob00134f), 2024-01-01
Supplement: d4ob00134f1.pdf [file d4ob00134f1.pdf]

## Electronic Supporting Information (ESI)

### Copper catalyzed dehydrogenative cyclization, alkenylation towards dihydroquinolinones

Keerthana Pari, Nawaz Khan Fazhlur-Rahman \*

\* *Organic and Medicinal Chemistry Research Laboratory, School of Advanced Sciences, Vellore  
Institute of Technology, Vellore-632 014, Tamil Nadu, India. E-mail: [nawaz\\_f@yahoo.co.in](mailto:nawaz_f@yahoo.co.in);*

#### Table of Contents

|                                                                              |         |
|------------------------------------------------------------------------------|---------|
| 1. General Information                                                       | S2      |
| 2. Experimental Procedure and Spectral Data                                  | S2-S17  |
| 3. References                                                                | S17     |
| 4. Control Experiment                                                        | S18-S21 |
| 5. Reaction Monitoring by <sup>1</sup> H NMR Analysis                        | S22-S23 |
| 6. Photophysical Studies                                                     | S24-S25 |
| 7. Copies of NMR ( <sup>1</sup> H & <sup>13</sup> C), FT-IR and HRMS Spectra | S26-S73 |
| 8. X-Ray Crystallography Data                                                | S74-S84 |

## 1. General Information

Chemicals were purchased from various suppliers including Sigma-Aldrich, Merck, and SRL and utilized without additional purification. Reactions were carried out in oven-dried glass containers. The progress of the reaction was monitored by thin-layer chromatography using pre-coated alumina TLC sheets (silica gel 60 F-254, Merck) and noticed using a UV detection chamber. The synthesized compounds were purified by silica gel (100-200 mesh) column chromatography. Proton ( $^1\text{H}$ ) and carbon-13 ( $^{13}\text{C}$ ) nuclear magnetic resonance (NMR) spectra were recorded at room temperature in  $\text{CDCl}_3$ , utilizing a Bruker AVANCE-III spectrometer operating at 400 MHz for  $^1\text{H}$  and 101 MHz for  $^{13}\text{C}$ . Chemical shifts ( $\delta$ ) are reported in parts per million (ppm) and coupling constants ( $J$ ) are provided in (Hz) by referencing TMS as an internal standard. Infrared (IR) spectra were recorded using a Thermo Nicolet iS50 with an inbuilt ATR (Shimadzu IR Tracer-100) spectrometer. A positive electrospray ionization ( $\text{ESI}^+$ ) mode was employed for High-resolution mass spectrometry on a WATERS-XEVO G2-XS-QToF. Single-crystal X-ray diffraction was recorded using a D8-QUEST single-crystal XRD diffractometer; all data calculations were executed using the APEX2 program package on the PC version. The UV-visible absorption and emission spectra were recorded using a JASCO V-670 PC spectrophotometer.

## 2. Experimental Procedure and Spectral Data

### 2.1 General procedure for the synthesis of compounds 4

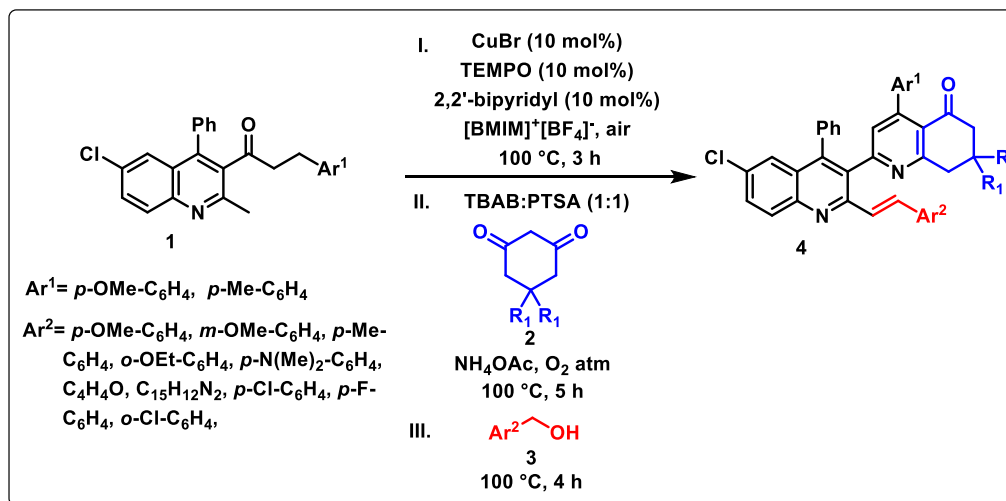

The synthesis of alkylated ketone **1** was performed according to a previously published procedure.<sup>4</sup> To an oven-dried reaction vial, added alkylated ketone **1** (1.0 mmol), CuBr (10 mol%), 2,2'-bipyridyl (10 mol%), TEMPO (10 mol%), [BMIM]<sup>+</sup>[BF<sub>4</sub>]<sup>-</sup> (1.5 ml) and the reaction mixture was stirred at 100 °C for 3 h in the air atmosphere, resulting in the formation of chalcone **1'**. Then TBAB:PTSA (1:1) (200 mg), 1,3-Cyclohexanedione **2** (1.5 mmol) and NH<sub>4</sub>OAc (10.0 mmol) were added and the reaction was continued at 100 °C for 5 h in the O<sub>2</sub> atmosphere, to form the cyclized intermediate **C**. After the formation of the cyclized intermediate **C**, alcohol **3** (1.0 mmol) was added and the reaction was continued at 100 °C for 4 h to obtain C(sp<sup>3</sup>)-H functionalized quinolinyl quinolinones **4**. The progress of the reaction was monitored by TLC. When the reaction was completed, the reaction mixture was cooled to room temperature, diluted with water (40 ml), and then extracted with DCM (50 ml x 2). The combined organic layers were dried over anhydrous MgSO<sub>4</sub>, and the crude reaction mixture was purified by silica gel column chromatography using 10-15% EtOAc/Pet ether as eluent to yield 65-86% of the desired products (**4A-4P**).

**(E)-6'-chloro-4-(4-methoxyphenyl)-2'-(4-methoxystyryl)-4'-phenyl-7,8-dihydro-[2,3'-biquinolin]-**

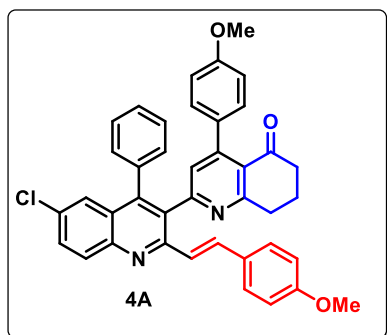

**5(6H)-one (4A)**. Purification was carried out by column chromatography on silica gel using a 10% ethyl acetate/Pet ether mixture, resulting in the isolation of **4A** as a Pale yellow solid (84% yield) mp: 235-237 °C; <sup>1</sup>H NMR (400 MHz, CDCl<sub>3</sub>) δ 8.05 (d, *J* = 9.0 Hz, 1H), 7.94 (d, *J* = 15.5 Hz, 1H), 7.58 (dd, *J* = 8.9, 2.0 Hz, 1H), 7.43 (d, *J* = 1.9 Hz, 1H), 7.34 (d, *J* = 8.5 Hz, 2H), 7.28 (s, 3H), 7.19 (s, 2H), 7.09 (s, 1H), 6.92 (d, *J* = 15.6 Hz, 1H), 6.81 (dd, *J* = 13.8, 6.7 Hz, 5H), 6.75 (d, *J* = 4.1 Hz, 1H), 3.75 (t, *J* = 5.1 Hz, 6H), 3.09 (t, *J* = 5.9 Hz, 2H), 2.61 (t, *J* = 6.4 Hz, 2H), 2.16 – 2.08 (m, 2H). <sup>13</sup>C NMR (101 MHz, CDCl<sub>3</sub>) δ 197.9, 164.1, 160.1, 159.5, 159.2, 153.6, 151.3, 146.9, 146.5, 135.8, 135.7, 132.1, 132.0, 131.6, 131.0, 130.9, 130.1, 129.7, 129.3, 128.9, 128.3, 128.2, 128.1, 126.9, 125.30, 124.4, 123.3, 114.1, 113.4, 55.3, 55.2, 40.1, 33.6, 21.6. FT-IR: ν = 2917, 1685, 1565, 1525, 1472, 1258, 1147, 1078, 955, 830, 702, 451 cm<sup>-1</sup>. HRMS (ESI): C<sub>40</sub>H<sub>31</sub>ClN<sub>2</sub>O<sub>3</sub> requires 623.2101 (M + H)<sup>+</sup>; found: 623.2103.

**(E)-6'-chloro-4-(4-methoxyphenyl)-2'-(3-methoxystyryl)-4'-phenyl-7,8-dihydro-[2,3'-biquinolin]-**

**5(6H)-one (4B)**. Purification was carried out by column chromatography on silica gel using a 10% ethyl acetate/Pet ether mixture, resulting in the isolation of **4B** as a Pale yellow solid (86% yield); mp: 230-232 °C; <sup>1</sup>H NMR (400 MHz, CDCl<sub>3</sub>) δ 8.05 (d, *J* = 9.0 Hz, 1H), 7.94 (d, *J* = 15.5 Hz, 1H), 7.58 (dd, *J* = 8.9, 2.0 Hz, 1H), 7.43 (d, *J* = 1.9 Hz, 1H), 7.34 (d, *J* = 8.5 Hz, 2H), 7.28 (s, 3H), 7.19 (s, 2H), 7.09 (s, 1H), 6.92 (d, *J* = 15.6 Hz, 1H), 6.81 (dd, *J* = 13.8, 6.7 Hz, 5H), 6.75 (d, *J* = 4.1 Hz, 1H), 3.75 (t, *J* = 5.1

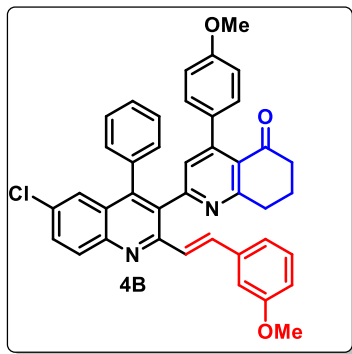

Hz, 6H), 3.09 (t,  $J = 5.9$  Hz, 2H), 2.61 (t,  $J = 6.4$  Hz, 2H), 2.16 – 2.08 (m, 2H).  $^{13}\text{C}$  NMR (101 MHz,  $\text{CDCl}_3$ )  $\delta$  197.9, 164.1, 159.7, 159.5, 158.9, 153.2, 151.3, 147.0, 146.4, 138.4, 135.7, 132.3, 132.2, 131.5, 131.1, 131.0, 130.1, 129.6, 129.3, 128.4, 128.3, 128.2, 127.1, 125.9, 125.3, 124.4, 124.0, 120.0, 113.9, 113.4, 113.1, 55.2, 40.1, 31.4, 30.2, 21.5. FT-IR:  $\nu = 2924, 1682, 1512, 1475, 1244, 1174, 1034, 955, 826, 704, 53$   $\text{cm}^{-1}$ . HRMS (ESI):  $\text{C}_{40}\text{H}_{31}\text{ClN}_2\text{O}_3$  requires 623.2101 ( $\text{M} + \text{H}$ ) $^+$ ; found: 623.2109.

**(E)-6'-chloro-4-(4-methoxyphenyl)-2'-(3-methoxystyryl)-7,7-dimethyl-4'-phenyl-7,8-dihydro-[2,3'-biquinolin]-5(6H)-one (4C).** Purification was carried out by column chromatography on silica gel using a 12% ethyl acetate/Pet ether mixture, resulting in the isolation of **4C** as a Pale white solid (83% yield);

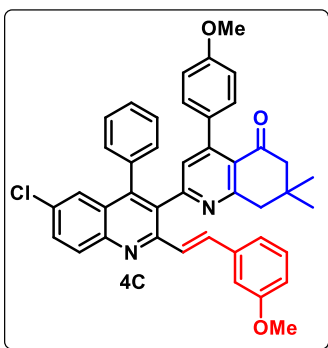

mp: 250-252°C;  $^1\text{H}$  NMR (400 MHz,  $\text{CDCl}_3$ )  $\delta$  8.07 (d,  $J = 9.0$  Hz, 1H), 7.94 (d,  $J = 15.6$  Hz, 1H), 7.59 (dd,  $J = 9.0, 2.0$  Hz, 1H), 7.47 (d,  $J = 1.9$  Hz, 1H), 7.26 (s, 3H), 7.20 – 7.13 (m, 2H), 7.08 (s, 2H), 7.01 – 6.91 (m, 2H), 6.86 – 6.71 (m, 6H), 3.73 (d,  $J = 5.3$  Hz, 6H), 2.99 (s, 2H), 2.47 (s, 2H), 1.03 (s, 6H).  $^{13}\text{C}$  NMR (101 MHz,  $\text{CDCl}_3$ )  $\delta$  197.90, 162.82, 159.79, 159.55, 159.27, 153.13, 151.02, 147.00, 146.42, 138.32, 135.90, 135.73, 132.32, 131.43, 131.14, 130.99, 130.12, 129.59, 129.34, 128.17, 127.06, 125.88, 125.30, 123.41, 119.92, 113.93, 113.42, 113.20, 55.26,

53.86, 47.62, 32.64, 28.11. FT-IR:  $\nu = 2938, 2175, 1687, 1577, 1511, 1248, 1152, 1038, 966, 829, 705, 539$   $\text{cm}^{-1}$ . HRMS (ESI):  $\text{C}_{42}\text{H}_{35}\text{ClN}_2\text{O}_3$  requires 651.2414 ( $\text{M} + \text{H}$ ) $^+$ ; found: 651.2414.

**(E)-6'-chloro-4-(4-methoxyphenyl)-7,7-dimethyl-2'-(4-methylstyryl)-4'-phenyl-7,8-dihydro-[2,3'-biquinolin]-5(6H)-one (4D).** Purification was carried out by column chromatography on silica gel using

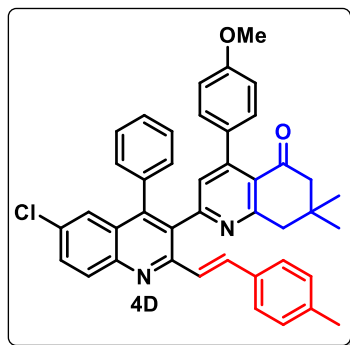

a 10% ethyl acetate/Pet ether mixture, resulting in the isolation of **4D** as a White solid (85% yield); mp: 240-242°C;  $^1\text{H}$  NMR (400 MHz,  $\text{CDCl}_3$ )  $\delta$  8.16 (d,  $J = 9.0$  Hz, 1H), 8.04 (d,  $J = 15.6$  Hz, 1H), 7.69 (dd,  $J = 9.0, 2.2$  Hz, 1H), 7.56 (d,  $J = 2.1$  Hz, 1H), 7.38 (d,  $J = 8.1$  Hz, 5H), 7.21 – 7.12 (m, 5H), 6.98 – 6.80 (m, 5H), 3.84 (s, 3H), 3.10 (s, 2H), 2.57 (s, 2H), 2.37 (s, 3H), 1.10 (d,  $J = 33.1$  Hz, 6H).  $^{13}\text{C}$  NMR (101 MHz,  $\text{CDCl}_3$ )  $\delta$  198.0, 162.8, 159.5, 159.4, 153.4, 151.0, 146.9, 146.5, 138.7, 136.0, 135.8, 134.1, 132.2, 132.1, 131.4, 131.1, 130.9, 130.1, 129.4,

129.3, 128.2, 128.2, 128.1, 127.4, 127.0, 125.3, 124.5, 123.4, 113.4, 55.3, 53.8, 47.6, 32.6, 21.4. **FT-IR:**  $\nu = 2952, 1691, 1570, 1363, 1244, 1174, 1035, 965, 828, 699, 546 \text{ cm}^{-1}$ . **HRMS (ESI):**  $\text{C}_{42}\text{H}_{36}\text{ClN}_2\text{O}_2$  requires 635.2465 ( $\text{M} + \text{H}$ )<sup>+</sup>; found: 635.2466.

**(E)-6'-chloro-2'-(2-ethoxystyryl)-4-(4-methoxyphenyl)-7,7-dimethyl-4'-phenyl-7,8-dihydro-[2,3'-**

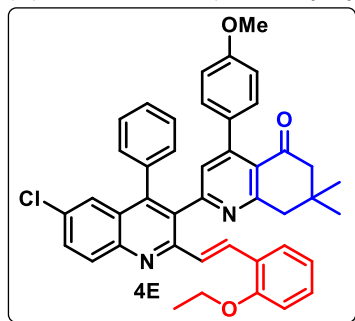

**biquinolin]-5(6H)-one (4E).** Purification was carried out by column chromatography on silica gel using a 10% ethyl acetate/Pet ether mixture, resulting in the isolation of **4E** as a White solid (80% yield); mp: 255-257°C; **<sup>1</sup>H NMR (400 MHz, CDCl<sub>3</sub>)**  $\delta$  8.23 (d,  $J = 15.7$  Hz, 1H), 8.12 (d,  $J = 7.6$  Hz, 1H), 7.58 (d,  $J = 9.0$  Hz, 1H), 7.44 (s, 1H), 7.36 (d,  $J = 7.4$  Hz, 1H), 7.29 – 7.20 (m, 4H), 7.20 – 7.11 (m, 2H), 7.08 (s, 2H), 6.83 (d,  $J = 8.1$  Hz, 2H), 6.78 (t,  $J = 7.7$  Hz, 4H), 3.96 (q,  $J = 6.8$  Hz,

2H), 3.73 (s, 3H), 2.96 (s, 2H), 2.44 (s, 2H), 1.21 (t,  $J = 6.9$  Hz, 3H), 1.01 (s, 6H). **<sup>13</sup>C NMR (101 MHz, CDCl<sub>3</sub>)**  $\delta$  197.9, 162.8, 159.5, 157.5, 153.9, 150.9, 135.7, 132.5, 132.1, 131.5, 130.9, 130.1, 129.7, 129.3, 129.2, 128.1, 128.0, 127.0, 125.8, 125.2, 123.4, 120.5, 113.4, 112.0, 63.8, 55.3, 53.9, 47.6, 32.6, 14.7. **FT-IR:**  $\nu = 2937, 1686, 1606, 1512, 1242, 1179, 1034, 962, 830, 704, 542 \text{ cm}^{-1}$ . **HRMS (ESI):**  $\text{C}_{43}\text{H}_{38}\text{ClN}_2\text{O}_3$  requires 665.2571 ( $\text{M} + \text{H}$ )<sup>+</sup>; found: 665.2578.

**(E)-6'-chloro-2'-(4-(dimethylamino)styryl)-4-(4-methoxyphenyl)-7,7-dimethyl-4'-phenyl-7,8-**

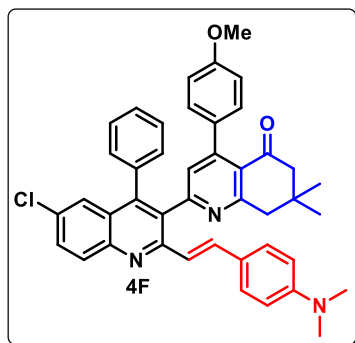

**dihydro-[2,3'-biquinolin]-5(6H)-one (4F).** Purification was carried out by column chromatography on silica gel using a 12% ethyl acetate/Pet ether mixture, resulting in the isolation of **4F** as a Pale brown solid (82% yield); mp: 262-264°C; **<sup>1</sup>H NMR (400 MHz, CDCl<sub>3</sub>)** 8.13 (d,  $J = 9.0$  Hz, 1H), 8.02 (d,  $J = 15.5$  Hz, 1H), 7.66 (dd,  $J = 9.0, 2.0$  Hz, 1H), 7.53 (d,  $J = 1.9$  Hz, 1H), 7.42 – 7.32 (m, 5H), 7.19 (s, 2H), 6.96 – 6.85 (m, 6H), 6.67 (d,  $J = 8.6$  Hz, 2H), 3.84 (s, 3H), 3.10 (d,  $J = 4.2$  Hz, 2H), 3.00 (s, 6H),

2.57 (s, 2H), 1.13 (s, 6H). **<sup>13</sup>C NMR (101 MHz, CDCl<sub>3</sub>)**  $\delta$  198.0, 162.8, 159.8, 159.5, 154.0, 150.9, 150.7, 146.7, 146.6, 136.4, 135.9, 132.1, 131.5, 130.9, 130.7, 130.1, 129.4, 128.8, 128.2, 128.1, 128.0, 126.7, 125.3, 125.0, 123.3, 120.7, 113.4, 112.0, 55.3, 53.9, 47.6, 40.3, 32.6. **FT-IR:**  $\nu = 2938, 2827, 2174, 1685, 1603, 1519, 1362, 1247, 1170, 1033, 646, 831, 694, 520 \text{ cm}^{-1}$ . **HRMS (ESI):**  $\text{C}_{43}\text{H}_{39}\text{ClN}_3\text{O}_2$  requires 664.2731 ( $\text{M} + \text{H}$ )<sup>+</sup>; found: 664.2735.

**(E)-6'-chloro-2'-(2-(furan-2-yl)vinyl)-4-(4-methoxyphenyl)-7,7-dimethyl-4'-phenyl-7,8-dihydro-**

**[2,3'-biquinolin]-5(6H)-one (4G).** Purification was carried out by column chromatography on silica gel using a 10% ethyl acetate/Pet ether mixture, resulting in the isolation of **4G** as a Dark brown solid (78% yield); mp: 222-224 °C; **<sup>1</sup>H NMR (400 MHz, CDCl<sub>3</sub>)**  $\delta$  8.09 (d,  $J = 8.9$  Hz, 1H), 7.87 (d,  $J = 15.3$  Hz,

1H), 7.64 (d,  $J = 8.4$  Hz, 1H), 7.52 (s, 1H), 7.31 (t,  $J = 19.1$  Hz, 4H), 7.15 (s, 2H), 7.00 (d,  $J = 15.3$  Hz,

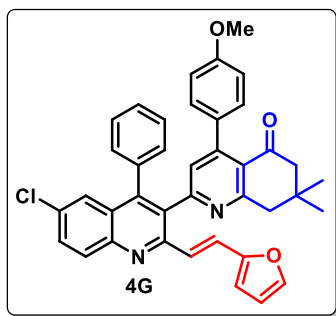

1H), 6.91 (d,  $J = 8.2$  Hz, 2H), 6.89 – 6.78 (m, 3H), 6.46 (d,  $J = 29.9$  Hz, 2H), 3.81 (s, 3H), 3.05 (s, 2H), 2.54 (s, 2H), 1.10 (s, 6H).  $^{13}\text{C}$  NMR (101 MHz,  $\text{CDCl}_3$ )  $\delta$  198.1, 162.9, 159.5, 159.2, 153.1, 153.0, 150.9, 146.9, 146.4, 143.1, 135.8, 132.3, 132.1, 131.5, 131.0, 130.9, 130.1, 129.4, 128.1, 127.0, 125.3, 123.4, 123.3, 123.0, 113.4, 112.0, 112.0, 55.3, 53.9, 47.5, 32.6. **FT-IR:**  $\nu = 2952, 1691, 1570, 1509, 1363, 1244, 1174, 1035, 965, 828, 699, 546$   $\text{cm}^{-1}$ . **HRMS (ESI):**  $\text{C}_{39}\text{H}_{32}\text{ClN}_2\text{O}_3$  requires 611.2101

( $\text{M} + \text{H}$ ) $^+$ ; found: 611.2110.

**(E)-6'-chloro-2'-(4-chlorostyryl)-4-(4-methoxyphenyl)-4'-phenyl-7,8-dihydro-[2,3'-biquinolin]-**

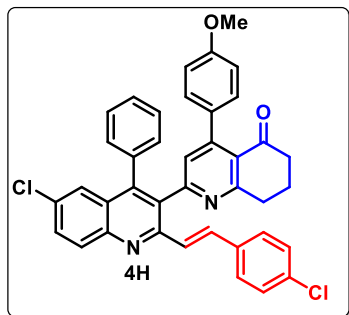

**5(6H)-one (4H).** Purification was carried out by column chromatography on silica gel using a 12% ethyl acetate/Pet ether mixture, resulting in the isolation of **4H** as a White solid (76% yield); mp: 253-255  $^\circ\text{C}$ ;  $^1\text{H}$  NMR (400 MHz,  $\text{CDCl}_3$ )  $\delta$  8.06 (d,  $J = 9.0$  Hz, 1H), 7.93 (d,  $J = 15.6$  Hz, 1H), 7.60 (dd,  $J = 9.0, 2.1$  Hz, 1H), 7.46 (t,  $J = 5.1$  Hz, 1H), 7.36 – 7.21 (m, 7H), 7.12 – 6.99 (m, 3H), 6.84 – 6.71 (m, 5H), 3.74 (s, 3H), 3.09 (t,  $J = 6.0$  Hz, 2H), 2.61 (t,  $J = 6.5$  Hz, 2H), 2.18 – 2.03 (m, 2H).  $^{13}\text{C}$  NMR (101

**MHz,  $\text{CDCl}_3$ )  $\delta$  197.9, 164.1, 159.6, 158.9, 151.4, 147.1, 146.4, 135.7, 135.2, 134.3, 132.6, 132.1, 131.4, 131.0, 130.1, 129.4, 129.3, 128.6, 128.3, 128.3, 128.2, 127.4, 127.2, 126.8, 125.3, 124.5, 113.4, 55.2, 40.1, 33.6, 21.5. **FT-IR:**  $\nu = 2941, 1685, 1569, 1510, 1472, 1240, 1175, 1036, 958, 826, 705, 659$   $\text{cm}^{-1}$ .**

**HRMS (ESI):**  $\text{C}_{39}\text{H}_{29}\text{Cl}_2\text{N}_2\text{O}_2$  requires 627.1606 ( $\text{M} + \text{H}$ ) $^+$ ; found: 627.1600.

**(E)-6'-chloro-2'-(4-fluorostyryl)-4-(4-methoxyphenyl)-4'-phenyl-7,8-dihydro-[2,3'-biquinolin]-**

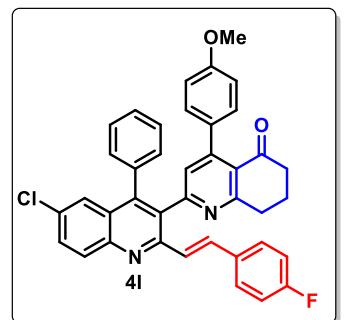

**5(6H)-one (4I).** Purification was carried out by column chromatography on silica gel using a 12% ethyl acetate/Pet ether mixture, resulting in the isolation of **4I** as a Pale yellow solid (75% yield); mp: 228-230  $^\circ\text{C}$ ;  $^1\text{H}$  NMR (400 MHz,  $\text{CDCl}_3$ )  $\delta$  8.06 (d,  $J = 9.0$  Hz, 1H), 7.94 (d,  $J = 15.6$  Hz, 1H), 7.60 (dd,  $J = 9.0, 2.3$  Hz, 1H), 7.45 (d,  $J = 2.2$  Hz, 1H), 7.37 (dd,  $J = 8.6, 5.5$  Hz, 2H), 7.31 – 7.28 (m, 2H), 7.19 (s, 2H), 7.09 (s, 2H), 6.99 (d,  $J = 5.0$  Hz, 1H), 6.97 – 6.93 (m, 2H), 6.83 – 6.79 (m, 2H), 6.78 (s, 1H), 6.75

(d,  $J = 6.7$  Hz), 3.74 (s, 3H), 3.09 (t,  $J = 6.1$  Hz, 2H), 2.61 (t,  $J = 6.6$  Hz, 2H), 2.12 (dt,  $J = 12.8, 6.5$  Hz, 2H).  $^{13}\text{C}$  NMR (101 MHz,  $\text{CDCl}_3$ )  $\delta$  197.9, 164.1, 159.6, 158.9, 153.1, 151.3, 147.0, 146.4, 135.7, 134.8, 133.1, 132.3, 132.1, 131.5, 131.1, 131.0, 129.1, 129.0, 128.3, 128.3, 128.2, 127.1, 125.3, 125.3, 124.4,

115.8, 115.6, 113.4, 55.2, 40.1, 33.6, 21.6. **FT-IR:**  $\nu = 2924, 1677, 1503, 1307, 1227, 1142, 979, 829, 702, 607, 499 \text{ cm}^{-1}$ . **HRMS (ESI):**  $\text{C}_{39}\text{H}_{29}\text{ClFN}_2\text{O}_2$  requires 611.1902 ( $\text{M} + \text{H}$ )<sup>+</sup>; found: 611.1905.

**(E)-6'-chloro-2'-(2-chlorostyryl)-4-(4-methoxyphenyl)-4'-phenyl-7,8-dihydro-[2,3'-biquinolin]-**

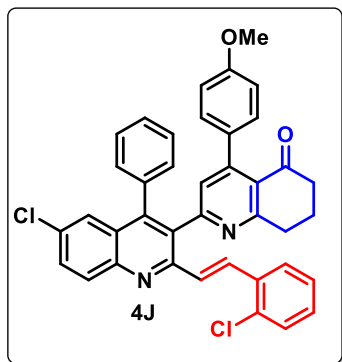

**5(6H)-one (4J).** Purification was carried out by column chromatography on silica gel using a 10% ethyl acetate/Pet ether mixture, resulting in the isolation of **4J** as a White solid (72% yield); mp: 216-218°C; **<sup>1</sup>H NMR (400 MHz, CDCl<sub>3</sub>)**  $\delta$  8.30 (d,  $J = 15.7$  Hz, 1H), 8.20 (d,  $J = 9.0$  Hz, 1H), 7.70 (dd,  $J = 9.0, 2.2$  Hz, 1H), 7.55 (d,  $J = 2.2$  Hz, 1H), 7.52 (dd,  $J = 5.2, 4.2$  Hz, 1H), 7.43 – 7.38 (m, 4H), 7.25 (dd,  $J = 14.0, 9.0$  Hz, 3H), 7.20 (s, 2H), 6.90 (d,  $J = 8.9$  Hz, 2H), 6.86 (d,  $J = 10.4$  Hz, 3H), 3.84 (s, 3H), 3.19 (t,  $J = 6.1$  Hz, 2H), 2.69 (t,  $J = 6.6$  Hz, 2H), 2.28 – 2.13 (m, 2H). **<sup>13</sup>C NMR**

**(101 MHz, CDCl<sub>3</sub>)**  $\delta$  197.8, 164.1, 159.5, 158.9, 153.0, 151.3, 147.0, 146.3, 135.6, 135.1, 134.3, 132.5, 132.3, 132.2, 131.5, 131.4, 131.0, 130.1, 130.0, 129.3, 129.2, 128.5, 128.3, 128.2, 128.1, 127.4, 127.1, 126.8, 125.2, 124.4, 113.4, 55.2, 40.1, 33.5, 21.5. **FT-IR:**  $\nu = 2941, 1684, 1566, 1507, 1472, 1243, 1178, 1041, 956, 830, 704, 549 \text{ cm}^{-1}$ . **HRMS (ESI):**  $\text{C}_{39}\text{H}_{29}\text{Cl}_2\text{N}_2\text{O}_2$  requires 627.1606 ( $\text{M} + \text{H}$ )<sup>+</sup>; found: 627.1603.

**(E)-6'-chloro-2'-(2-chlorostyryl)-4-(4-methoxyphenyl)-4'-phenyl-7,8-dihydro-[2,3'-biquinolin]-**

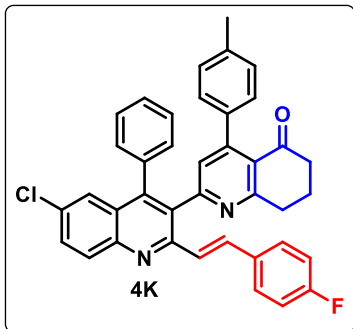

**5(6H)-one (4K).** Purification was carried out by column chromatography on silica gel using a 10% ethyl acetate/Pet ether mixture, resulting in the isolation of **4K** as a Pale yellow solid (79% yield); mp: 230-232°C; **<sup>1</sup>H NMR (400 MHz, CDCl<sub>3</sub>)**  $\delta$  8.05 (d,  $J = 9.0$  Hz, 1H), 7.94 (d,  $J = 15.6$  Hz, 1H), 7.58 (dd,  $J = 9.0, 2.3$  Hz, 1H), 7.44 (d,  $J = 2.2$  Hz, 1H), 7.36 (dd,  $J = 8.5, 5.5$  Hz, 2H), 7.28 (d,  $J = 3.0$  Hz, 3H), 7.06 (t,  $J = 8.1$  Hz, 4H), 6.98 (d,  $J = 7.5$  Hz, 1H), 6.94 (d,  $J = 8.8$  Hz, 2H), 6.75 (d,  $J = 7.7$

Hz, 3H), 3.09 (t,  $J = 6.1$  Hz, 2H), 2.60 (t,  $J = 6.5$  Hz, 2H), 2.28 (s, 3H), 2.16 – 2.06 (m, 2H). **<sup>13</sup>C NMR (101 MHz, CDCl<sub>3</sub>)**  $\delta$  197.7, 164.1, 164.0, 161.7, 159.0, 153.1, 151.7, 147.1, 146.4, 137.8, 136.5, 135.7, 134.8, 133.1, 133.1, 132.3, 132.1, 131.1, 131.0, 130.1, 129.1, 129.0, 128.7, 128.3, 128.2, 127.7, 127.1, 125.3, 125.3, 125.2, 124.5, 115.8, 115.6, 40.0, 33.5, 21.6, 21.3. **FT-IR:**  $\nu = 2921, 1678, 1505, 1307, 1227, 1143, 977, 828, 704, 607, 504 \text{ cm}^{-1}$ . **HRMS (ESI):**  $\text{C}_{39}\text{H}_{28}\text{ClFN}_2\text{O}$  requires 595.1952 ( $\text{M} + \text{H}$ )<sup>+</sup>; found: 595.1962.

**(E)-6'-chloro-2'-(2-chlorostyryl)-4'-phenyl-4-(p-tolyl)-7,8-dihydro-[2,3'-biquinolin]-5(6H)-one (4L).**

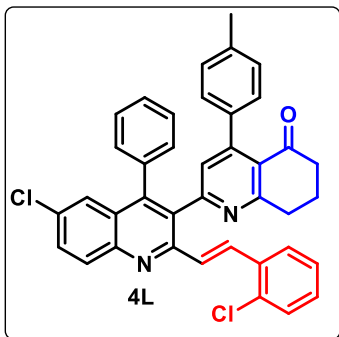

Purification was carried out by column chromatography on silica gel using a 10% ethyl acetate/Pet ether mixture, resulting in the isolation of **4L** as a White solid (65% yield); mp: 262-264 °C; <sup>1</sup>H NMR (400 MHz, CDCl<sub>3</sub>) δ 8.19 (d, *J* = 15.7 Hz, 1H), 8.10 (d, *J* = 9.0 Hz, 1H), 7.60 (dd, *J* = 9.0, 2.3 Hz, 1H), 7.47 – 7.39 (m, 2H), 7.34 – 7.30 (m, 1H), 7.30 – 7.27 (m, 3H), 7.19 – 7.12 (m, 3H), 7.10 – 7.02 (m, 4H), 6.74 (d, *J* = 7.4 Hz, 3H), 3.09 (t, *J* = 6.2 Hz, 2H), 2.58 (t, *J* = 6.6 Hz, 2H), 2.28 (s, 3H), 2.15

– 2.06 (m, 2H). <sup>13</sup>C NMR (101 MHz, CDCl<sub>3</sub>) δ 197.7, 164.0, 159.0, 153.0, 151.7, 147.1, 146.4, 137.8, 136.5, 135.6, 135.2, 134.3, 132.6, 132.4, 132.2, 131.4, 131.0, 130.1, 130.0, 129.4, 128.7, 128.6, 128.3, 128.2, 128.2, 127.7, 127.4, 127.2, 126.8, 125.3, 124.5, 40.0, 33.5, 21.6, 21.3. FT-IR: ν = 2921, 2170, 1686, 1527, 1472, 1261, 1081, 958, 826, 705, 660, 513 cm<sup>-1</sup>. HRMS (ESI): C<sub>39</sub>H<sub>29</sub>Cl<sub>2</sub>N<sub>2</sub>O requires 611.1657 (M + H)<sup>+</sup>; found: 611.1665.

**(E)-6'-chloro-2'-(4-fluorostyryl)-4-(4-methoxyphenyl)-7,7-dimethyl-4'-phenyl-7,8-dihydro-[2,3'-**

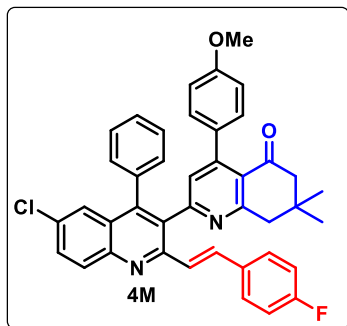

**biquinolin]-5(6H)-one (4M).** Purification was carried out by column chromatography on silica gel using a 12% ethyl acetate/Pet ether mixture, resulting in the isolation of **4M** as a Pale white solid (78% yield) mp: 232-234 °C; <sup>1</sup>H NMR (400 MHz, CDCl<sub>3</sub>) δ 8.16 (d, *J* = 9.0 Hz, 1H), 8.03 (d, *J* = 15.6 Hz, 1H), 7.70 (dd, *J* = 9.0, 2.1 Hz, 1H), 7.57 (d, *J* = 2.0 Hz, 1H), 7.45 (dd, *J* = 8.4, 5.6 Hz, 2H), 7.37 (s, 3H), 7.19 (s, 2H), 7.06 (dd, *J* = 12.1, 7.8 Hz, 3H), 6.94 – 6.83 (m, 5H), 3.84 (s, 3H),

3.09 (s, 2H), 2.58 (s, 2H), 1.14 (s, 6H). <sup>13</sup>C NMR (101 MHz, CDCl<sub>3</sub>) δ 197.9, 164.1, 162.8, 159.6, 159.3, 153.1, 151.0, 147.0, 146.4, 135.7, 134.7, 133.0, 132.3, 132.2, 131.3, 131.1, 131.0, 130.1, 129.3, 129.1, 129.0, 128.2, 127.0, 125.3, 125.2, 123.4, 115.8, 115.6, 113.4, 55.3, 53.8, 47.6, 32.7. FT-IR: ν = 2924, 2176, 1688, 1573, 1511, 1248, 1080, 1037, 959, 826, 701, 540 cm<sup>-1</sup>. HRMS (ESI): C<sub>41</sub>H<sub>33</sub>ClF<sub>1</sub>N<sub>2</sub>O<sub>2</sub> requires 639.2215 (M + H)<sup>+</sup>; found: 639.2217.



**(E)-6'-chloro-2'-(4-chlorostyryl)-4-(4-methoxyphenyl)-7,7-dimethyl-4'-phenyl-7,8-dihydro-[2,3'-**

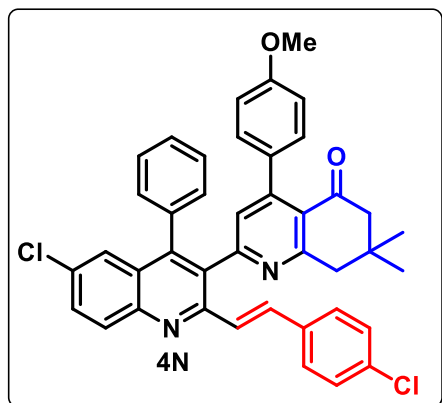

**biquinolin]-5(6H)-one (4N).** Purification was carried out by column chromatography on silica gel using a 12% ethyl acetate/Pet ether mixture, resulting in the isolation of **4N** as a White solid (76% yield); mp: 244-246 °C;  $^1\text{H NMR}$  (400 MHz,  $\text{CDCl}_3$ )  $\delta$  8.16 (d,  $J = 9.0$  Hz, 1H), 8.02 (d,  $J = 15.6$  Hz, 1H), 7.70 (dd,  $J = 9.0, 2.3$  Hz, 1H), 7.57 (d,  $J = 2.2$  Hz, 1H), 7.41 (d,  $J = 8.5$  Hz, 2H), 7.37 (s, 2H), 7.35 – 7.27 (m, 3H), 7.15 (t,  $J = 15.0$  Hz, 3H), 6.89 (q,  $J = 8.8$  Hz, 4H), 6.84 (s, 1H), 3.84 (s, 3H), 3.09 (s, 2H), 2.58 (s, 2H), 1.14 (s, 6H).  $^{13}\text{C NMR}$  (101 MHz,  $\text{CDCl}_3$ )  $\delta$  197.8, 162.8, 159.6, 159.2, 152.9, 151.1, 147.0, 146.4, 135.7, 135.4, 134.5, 134.3, 132.4, 132.3, 131.4, 131.1, 131.1, 130.1, 129.3, 128.9, 128.5, 128.2, 127.1, 126.1, 125.3, 123.4, 113.4, 55.3, 53.8, 47.6, 32.6, 28.1. **FT-IR:**  $\nu = 2952, 1683, 1577, 1509, 1244, 1176, 1087, 1031, 963, 834, 698, 541$   $\text{cm}^{-1}$ . **HRMS (ESI):**  $\text{C}_{41}\text{H}_{33}\text{Cl}_2\text{N}_2\text{O}_2$  requires 655.1919 ( $\text{M} + \text{H}$ ) $^+$ ; found: 655.1915.

**(E)-6'-chloro-2'-(4-chlorostyryl)-7,7-dimethyl-4'-phenyl-4-(p-tolyl)-7,8-dihydro-[2,3'-biquinolin]-**

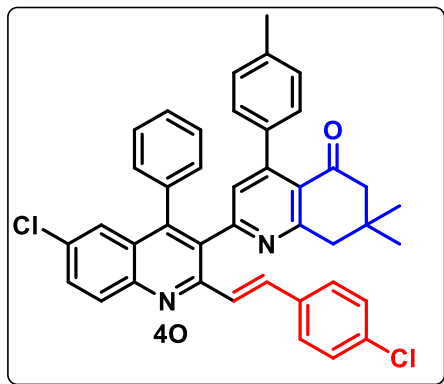

**5(6H)-one (4O).** Purification was carried out by column chromatography on silica gel using a 10% ethyl acetate/Pet ether mixture, resulting in the isolation of **4O** as a White solid (73% yield) mp: 236-238 °C;  $^1\text{H NMR}$  (400 MHz,  $\text{CDCl}_3$ )  $\delta$  8.06 (d,  $J = 9.0$  Hz, 1H), 7.91 (d,  $J = 15.6$  Hz, 1H), 7.59 (dd,  $J = 9.0, 2.1$  Hz, 1H), 7.47 (d,  $J = 1.7$  Hz, 1H), 7.30 (d,  $J = 8.4$  Hz, 2H), 7.22 (dd,  $J = 21.4, 13.0$  Hz, 5H), 7.04 (t,  $J = 10.9$  Hz, 5H), 6.75 (d,  $J = 9.6$  Hz, 3H), 2.99 (s, 2H), 2.46 (s, 2H), 2.28 (s, 3H), 1.03 (s, 6H).  $^{13}\text{C NMR}$  (101 MHz,  $\text{CDCl}_3$ )  $\delta$  197.3, 168.0, 163.2, 158.0, 156.4, 146.0, 145.7, 136.7, 135.2, 132.5, 131.0, 130.8, 130.3, 129.5, 129.3, 128.7, 128.5, 128.5, 128.4, 126.0, 125.2, 113.8, 113.5, 61.5, 55.4, 55.2, 44.1, 43.5, 39.9, 13.6. **FT-IR:**  $\nu = 2913, 1688, 1524, 1476, 1261, 1146, 1078, 956, 830, 747, 706, 659$   $\text{cm}^{-1}$ . **HRMS (ESI):**  $\text{C}_{41}\text{H}_{33}\text{Cl}_2\text{N}_2\text{O}$  requires 639.1970 ( $\text{M} + \text{H}$ ) $^+$ ; found: 639.1970.

**(E)-6'-chloro-2'-(2-chlorostyryl)-7,7-dimethyl-4'-phenyl-4-(p-tolyl)-7,8-dihydro-[2,3'-biquinolin]-**

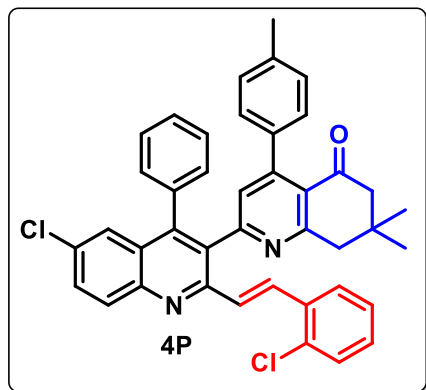

**5(6H)-one (4P).** Purification was carried out by column chromatography on silica gel using a 10% ethyl acetate/Pet ether mixture, resulting in the isolation of **4P** as a White solid (70% yield) mp: 234-236°C; <sup>1</sup>H NMR (400 MHz, CDCl<sub>3</sub>) δ 8.31 (d, *J* = 15.7 Hz, 1H), 8.20 (d, *J* = 9.0 Hz, 1H), 7.70 (dd, *J* = 9.0, 2.1 Hz, 1H), 7.57 (d, *J* = 1.9 Hz, 1H), 7.53 – 7.48 (m, 1H), 7.40 (dd, *J* = 14.7, 7.8 Hz, 4H), 7.22 (d, *J* = 4.8 Hz, 3H), 7.20 – 7.12 (m, 4H), 6.85 (d, *J* = 5.3 Hz, 3H), 3.09 (s, 2H), 2.55 (s, 2H), 2.38 (s, 3H),

1.12 (s, 6H). <sup>13</sup>C NMR (101 MHz, CDCl<sub>3</sub>) δ 197.7, 162.8, 159.3, 152.9, 151.4, 147.1, 146.4, 137.8, 136.4, 135.7, 135.1, 134.4, 132.6, 132.3, 132.2, 131.4, 131.0, 130.1, 130.0, 129.4, 128.7, 128.5, 128.2, 128.1, 127.7, 127.3, 127.1, 126.8, 125.3, 123.5, 53.7, 47.6, 32.6, 21.3. **FT-IR:** ν = 2960, 1698, 1531, 1472, 1276, 1143, 1065, 956, 824, 752, 706, 543 cm<sup>-1</sup>. **HRMS (ESI):** C<sub>41</sub>H<sub>33</sub>Cl<sub>2</sub>N<sub>2</sub>O requires 639.1970 (M + H)<sup>+</sup>; found: 639.1975.

## 2.2 General procedure for the synthesis of compounds 5

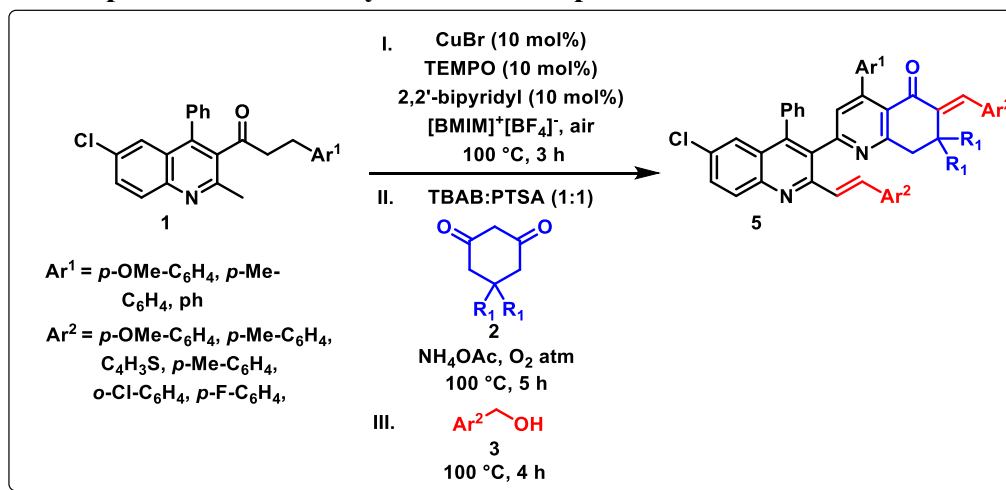

To an oven-dried reaction vial, added alkylated ketone **1** (1.0 mmol), CuBr (10 mol%), 2,2'-bipyridyl (10 mol%), TEMPO (10 mol%), and [BMIM]<sup>+</sup>[BF<sub>4</sub>]<sup>-</sup> (1.5 ml) and the reaction mixture was stirred at 100 °C for 3 h in the air atmosphere, resulting in the formation of chalcone **1'**. Then TBAB:PTSA (1:1) (200 mg), 1,3-Cyclohexanedione **2** (1.5 mmol) and NH<sub>4</sub>OAc (10.0 mmol) were added and the reaction was continued at 100 °C for 5 h in the O<sub>2</sub> atmosphere, to form the cyclized intermediate **C**. After the formation

of the cyclized intermediate **C**, alcohol **3** (3.0 mmol) was added and the reaction was continued at 100 °C for 7 h to obtain C(sp<sup>3</sup>)-H functionalized/ $\alpha$ -alkenylated quinolinyl quinolinones **5**. The progress of the reaction was monitored by TLC. When the reaction was completed, the reaction mixture was cooled to room temperature, diluted with water (40 ml), and then extracted with DCM (50 ml x 2). The combined organic layers were dried over anhydrous MgSO<sub>4</sub>, and the crude reaction mixture was purified by silica gel column chromatography using 5-7% EtOAc/Pet ether as eluent to yield 71-83% of the desired products (**5A-5F**).

**6'-chloro-6-((E)-4-methoxybenzylidene)-4-(4-methoxyphenyl)-2'-((E)-4-methoxystyryl)-4'-phenyl-**

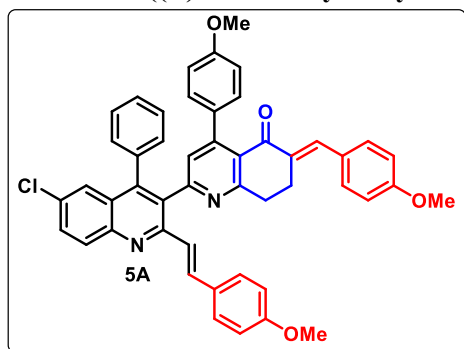

**7,8-dihydro-[2,3'-biquinolin]-5(6H)-one (5A).** Purification was carried out by column chromatography on silica gel using a 7% ethyl acetate/Pet ether mixture, resulting in the isolation of **5A** as a Pale yellow solid (79% yield); mp: 272-274 °C; <sup>1</sup>H NMR (400 MHz, CDCl<sub>3</sub>)  $\delta$  8.13 (d, *J* = 9.0 Hz, 1H), 8.02 (d, *J* = 15.6 Hz, 1H), 7.75 (s, 1H), 7.65 (dd, *J* = 9.0, 2.2 Hz, 1H), 7.52 (d, *J* = 2.2 Hz, 1H), 7.44 (t, *J* = 8.5 Hz, 4H), 7.36 (s, 3H),

7.18 (s, 2H), 7.04-6.93 (m, 5H), 6.92-6.84 (m, 5H), 3.85 (s, 3H), 3.82 (s, 6H), 3.21 (t, *J* = 5.7 Hz, 2H), 3.12 (d, *J* = 6.0 Hz, 2H). <sup>13</sup>C NMR (101 MHz, CDCl<sub>3</sub>)  $\delta$  187.2, 162.5, 160.3, 160.1, 159.6, 158.8, 154.7, 151.4, 147.0, 137.4, 135.8, 133.3, 132.2, 132.0, 132.0, 131.4, 131.0, 130.9, 130.1, 129.7, 129.4, 128.9, 128.4, 128.2, 128.1, 128.1, 127.0, 125.4, 125.3, 123.3, 114.2, 114.1, 113.6, 55.4, 55.3, 55.2, 32.3, 25.9. FT-IR:  $\nu$  = 2921, 1684, 1582, 1509, 1246, 1177, 1079, 1031, 832, 695, 550 cm<sup>-1</sup>. HRMS (ESI): C<sub>48</sub>H<sub>38</sub>ClN<sub>2</sub>O<sub>4</sub> requires 741.2520 (M + H)<sup>+</sup>; found: 741.2523.

**6'-chloro-4-(4-methoxyphenyl)-6-((E)-4-methylbenzylidene)-2'-((E)-4-methylstyryl)-4'-phenyl-7,8-**

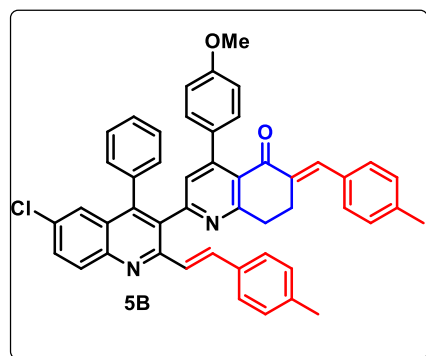

**dihydro-[2,3'-biquinolin]-5(6H)-one (5B).** Purification was carried out by column chromatography on silica gel using a 7% ethyl acetate/Pet ether mixture, resulting in the isolation of **5B** as a Pale yellow solid (83% yield) mp: 268-270 °C; <sup>1</sup>H NMR (400 MHz, CDCl<sub>3</sub>)  $\delta$  8.13 (d, *J* = 8.9 Hz, 1H), 8.03 (d, *J* = 15.5 Hz, 1H), 7.76 (s, 1H), 7.66 (d, *J* = 9.0 Hz, 1H), 7.52 (s, 1H), 7.36 (s, 7H), 7.23 (d, *J* = 7.7 Hz, 2H), 7.13 (dd, *J* = 17.3, 11.8 Hz, 5H),

6.97 (d, *J* = 8.1 Hz, 2H), 6.92 – 6.84 (m, 3H), 3.82 (s, 3H), 3.19 (d, *J* = 5.5 Hz, 2H), 3.11 (d, *J* = 5.2 Hz, 2H), 2.39 (s, 3H), 2.35 (s, 3H). <sup>13</sup>C NMR (101 MHz, CDCl<sub>3</sub>)  $\delta$  187.2, 162.7, 159.6, 158.9, 153.6, 151.5, 147.0, 146.4, 139.3, 138.7, 137.6, 136.1, 135.8, 134.5, 134.2, 132.7, 132.3, 132.1, 131.4, 131.1, 130.9, 130.1, 129.4, 129.4, 129.3, 128.2, 128.1, 127.4, 127.0, 125.3, 125.3, 124.6, 113.6, 55.2, 32.4, 25.9, 21.5,

21.4. **FT-IR:**  $\nu = 2952, 1684, 1581, 1512, 1249, 1173, 1026, 966, 830, 703, 532 \text{ cm}^{-1}$ . **HRMS (ESI):**  $\text{C}_{48}\text{H}_{38}\text{ClN}_2\text{O}_2$  requires 709.2622 ( $\text{M} + \text{H}$ )<sup>+</sup>; found: 709.2621.

**(E)-6'-chloro-4-(4-methoxyphenyl)-4'-phenyl-2'-((E)-2-(thiophen-2-yl)vinyl)-6-(thiophen-2-ylmethylene)-7,8-dihydro-[2,3'-biquinolin]-5(6H)-one (5C).**

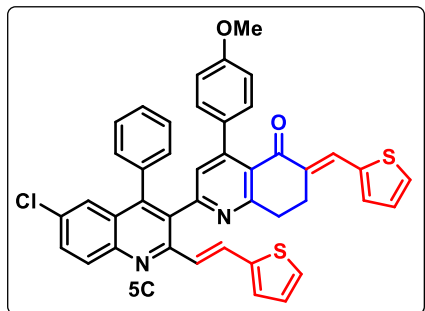

Purification was carried out by column chromatography on silica gel using a 5% ethyl acetate/Pet ether mixture, resulting in the isolation of **5C** as a Pale brown solid (81% yield) mp: 274-276 °C; **<sup>1</sup>H NMR (400 MHz, CDCl<sub>3</sub>)**  $\delta$  8.07 (dd,  $J = 28.7, 12.1$  Hz, 2H), 7.86 (s, 1H), 7.59 (dd,  $J = 9.0, 2.2$  Hz, 1H), 7.47 (dd,  $J = 9.3, 3.6$  Hz, 2H), 7.30 (s, 4H), 7.19 (s, 1H), 7.14 (dd,  $J = 11.5, 4.0$  Hz, 2H),

7.09 – 7.06 (m, 1H), 6.97 – 6.93 (m, 2H), 6.91 – 6.84 (m, 3H), 6.79 (d,  $J = 8.7$  Hz, 3H), 3.75 (s, 3H), 3.16 (d,  $J = 4.2$  Hz, 4H). **<sup>13</sup>C NMR (101 MHz, CDCl<sub>3</sub>)**  $\delta$  186.9, 162.5, 159.6, 158.5, 153.1, 151.2, 146.9, 146.4, 142.6, 138.0, 135.8, 133.6, 132.2, 132.0, 131.3, 131.0, 130.2, 130.0, 130.0, 129.4, 128.7, 128.6, 128.5, 128.4, 128.2, 127.9, 127.8, 127.0, 125.9, 125.4, 125.1, 113.6, 55.2, 31.7, 25.7. **FT-IR:**  $\nu = 2952, 1682, 1580, 1512, 1370, 1245, 1177, 1027, 968, 830, 702, 538 \text{ cm}^{-1}$ . **HRMS (ESI):**  $\text{C}_{42}\text{H}_{30}\text{ClN}_2\text{O}_2\text{S}_2$  requires 693.1437 ( $\text{M} + \text{H}$ )<sup>+</sup>; found: 693.1431.

**6'-chloro-6-((E)-4-methylbenzylidene)-2'-((E)-4-methylstyryl)-4,4'-diphenyl-7,8-dihydro-[2,3'-**

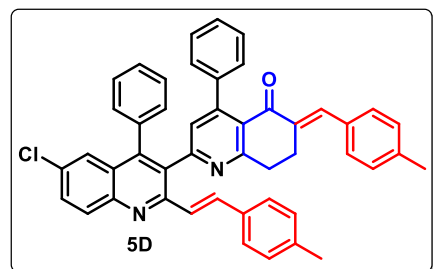

**biquinolin]-5(6H)-one (5D).** Purification was carried out by column chromatography on silica gel using a 5% ethyl acetate/Pet ether mixture, resulting in the isolation of **5D** as a Pale yellow solid (74% yield) mp: 252-254 °C **<sup>1</sup>H NMR (400 MHz, CDCl<sub>3</sub>)**  $\delta$  8.14 (d,  $J = 9.0$  Hz, 1H), 8.03 (d,  $J = 15.6$  Hz, 1H), 7.75 (s, 1H), 7.67 (dd,  $J = 9.0, 2.3$  Hz, 1H), 7.53

(d,  $J = 2.2$  Hz, 1H), 7.37 (dd,  $J = 11.6, 5.2$  Hz, 10H), 7.23 (d,  $J = 8.0$  Hz, 3H), 7.13 (dd,  $J = 20.3, 11.7$  Hz, 5H), 7.01 (dd,  $J = 6.6, 2.9$  Hz, 2H), 3.21 (d,  $J = 6.4$  Hz, 2H), 3.13 (d,  $J = 6.2$  Hz, 2H), 2.40 (s, 3H), 2.36 (s, 3H). **<sup>13</sup>C NMR (101 MHz, CDCl<sub>3</sub>)**  $\delta$  187.0, 162.6, 153.5, 151.9, 139.4, 138.8, 137.8, 136.1, 135.7, 134.3, 134.1, 132.6, 132.2, 131.1, 131.0, 130.1, 130.0, 129.4, 129.3, 128.7, 128.4, 128.3, 128.3, 128.2, 128.1, 128.0, 127.8, 127.4, 127.0, 125.3, 125.2, 124.5, 32.4, 25.9, 21.5, 21.4. **FT-IR:**  $\nu = 2956, 1681, 1577, 1512, 1366, 1244, 1174, 1075, 1024, 964, 830, 700, 539 \text{ cm}^{-1}$ . **HRMS (ESI):**  $\text{C}_{47}\text{H}_{36}\text{ClN}_2\text{O}$  requires 679.2516 ( $\text{M} + \text{H}$ )<sup>+</sup>; found: 679.2515.

**6'-chloro-6-((E)-2-chlorobenzylidene)-2'-((E)-2-chlorostyryl)-4-(4-methoxyphenyl)-4'-phenyl-7,8-**

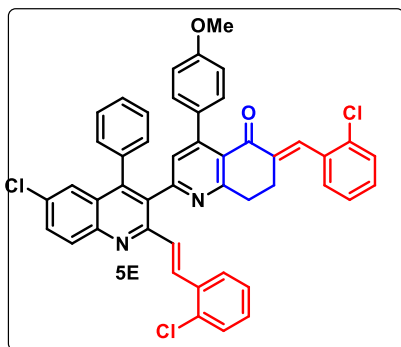

**dihydro-[2,3'-biquinolin]-5(6H)-one (5E).** Purification was carried out by column chromatography on silica gel using a 12% ethyl acetate/Pet ether mixture, resulting in the isolation of **5E** as a White solid (71% yield); mp: 268-270 °C;  $^1\text{H NMR}$  (400 MHz,  $\text{CDCl}_3$ )  $\delta$  8.37 – 8.17 (m, 2H), 7.91 (s, 1H), 7.71 (s, 1H), 7.51 (d,  $J = 31.2$  Hz, 4H), 7.40 (s, 4H), 7.33 (s, 2H), 7.26 (d,  $J = 12.7$  Hz, 5H), 6.95 (d,  $J = 20.8$  Hz, 5H), 3.85 (s, 3H), 3.11 (d,  $J = 31.8$  Hz, 4H).  $^{13}\text{C NMR}$

(101 MHz,  $\text{CDCl}_3$ )  $\delta$  186.46, 163.00, 159.65, 159.04, 153.03, 152.10, 147.11, 146.42, 136.67, 135.65, 135.16, 135.04, 134.42, 134.33, 134.10, 132.57, 132.37, 132.21, 131.45, 131.42, 131.03, 130.21, 130.11, 130.04, 129.92, 129.32, 128.61, 128.33, 128.24, 127.45, 127.16, 126.86, 126.44, 125.30, 124.89, 113.61, 55.23, 32.62, 25.96. **FT-IR:**  $\nu = 2915, 1605, 1513, 1250, 1176, 1089, 953, 834, 704$   $\text{cm}^{-1}$ . **HRMS (ESI):**  $\text{C}_{46}\text{H}_{32}\text{Cl}_3\text{N}_2\text{O}_2$  requires 749.1529 ( $\text{M} + \text{H}$ ) $^+$ ; found: 749.1531.

**6'-chloro-6-((E)-4-fluorobenzylidene)-2'-((E)-4-fluorostyryl)-4'-phenyl-4-(p-tolyl)-7,8-dihydro-[2,3'-**

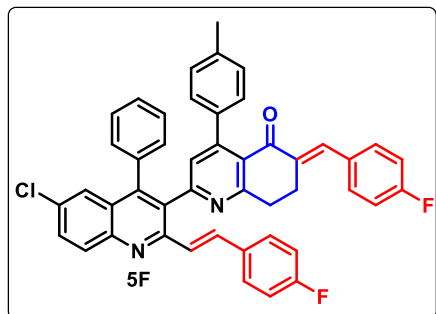

**biquinolin]-5(6H)-one (5F).** Purification was carried out by column chromatography on silica gel using a 5% ethyl acetate/Pet ether mixture, resulting in the isolation of **5F** as a Pale yellow solid (73% yield); mp: 258-620 °C;  $^1\text{H NMR}$  (400 MHz,  $\text{CDCl}_3$ ) 8.07 (d,  $J = 9.0$  Hz, 1H), 7.95 (d,  $J = 15.6$  Hz, 1H), 7.66 (s, 1H), 7.60 (dd,  $J = 9.0, 2.3$  Hz, 1H), 7.46 (d,  $J = 2.2$  Hz, 1H), 7.37 (ddd,  $J = 8.4, 5.6, 2.2$  Hz, 4H), 7.32 – 7.26 (m, 3H), 7.12 – 7.06 (m, 4H),

7.05 (s, 1H), 7.02 (d,  $J = 5.6$  Hz, 1H), 6.97 (dd,  $J = 9.9, 7.5$  Hz, 3H), 6.84 (d,  $J = 7.8$  Hz, 3H), 3.10 (d,  $J = 5.4$  Hz, 2H), 3.06 (d,  $J = 6.0$  Hz, 2H), 2.30 (s, 3H).  $^{13}\text{C NMR}$  (101 MHz,  $\text{CDCl}_3$ )  $\delta$  186.5, 163.0, 159.7, 159.0, 153.0, 152.1, 147.1, 146.4, 136.7, 135.7, 135.2, 135.0, 134.4, 134.3, 134.1, 132.6, 132.4, 132.2, 131.5, 131.4, 131.0, 130.2, 130.1, 130.0, 129.9, 129.3, 128.6, 128.3, 128.2, 127.5, 127.2, 126.9, 126.4, 125.3, 124.9, 113.6, 55.2, 32.6, 26.0. **FT-IR:**  $\nu = 2933, 1686, 1529, 1478, 1243, 1157, 1076, 1071, 832, 758, 698, 653, 535$   $\text{cm}^{-1}$ . **HRMS (ESI):**  $\text{C}_{46}\text{H}_{32}\text{ClF}_2\text{N}_2\text{O}$  requires 701.2171 ( $\text{M} + \text{H}$ ) $^+$ ; found: 701.2172.

## 2.3 The gram-scale synthesis of 4A

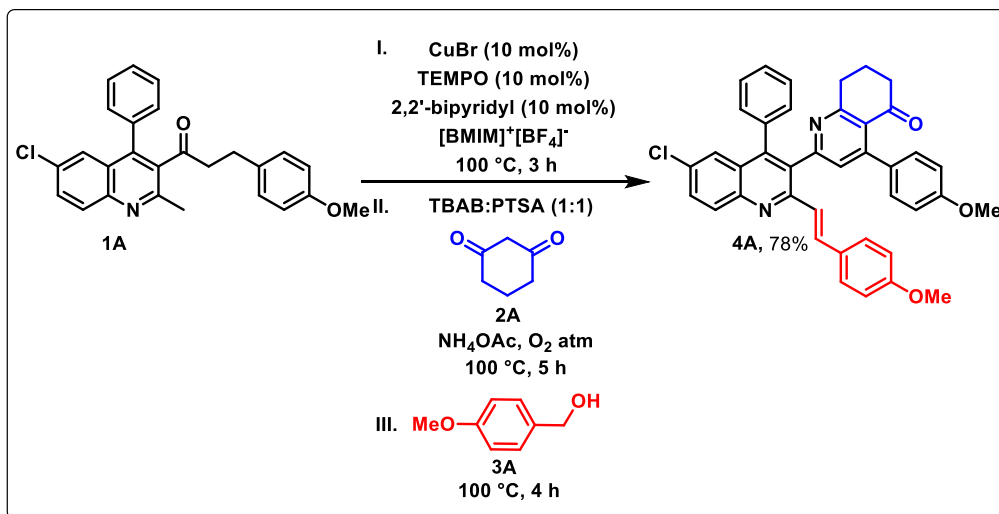

To an oven-dried reaction vial, added alkylated ketone **1** (10 mmol), CuBr (10 mol%), TEMPO (10 mol%), and [BMIM]<sup>+</sup>[BF<sub>4</sub>]<sup>-</sup> (15 ml), and the reaction mixture was stirred at 100 °C for 3 h in the air atmosphere, resulting in the formation of chalcone **1A'**. Then TBAB:PTSA (1:1) (2000mg), 1,3-Cyclohexanedione **2A** (15 mmol) and NH<sub>4</sub>OAc (100 mmol), were added and the reaction was continued at 100 °C for 5 h in the O<sub>2</sub> atmosphere, to form the cyclized intermediate **C**. After the formation of the cyclized intermediate **C**, alcohol **3A** was added and the reaction was continued at 100 °C for 4 h to obtain C(sp<sup>3</sup>)-H functionalized quinolinyl quinolinone **4A**. The progress of the reaction was monitored using TLC. After the reaction was completed, the reaction mixture was cooled to room temperature, diluted with water (400 ml) and then extracted with DCM (500 ml x 2). The combined organic layers were dried over anhydrous MgSO<sub>4</sub>, and the crude reaction mixture was purified by silica gel column chromatography using 10% EtOAc/Pet ether as eluent, to yield the desired product of C(sp<sup>3</sup>)-H functionalized quinolinyl dihydroquinolinone **4A** in a slightly decreased yield of 78%.

## 2.4 Product functionalization

### 2.4.1 Synthesis of the heterocyclic containing C(sp<sup>3</sup>)-H functionalized quinolinyl quinolinone (4Q)

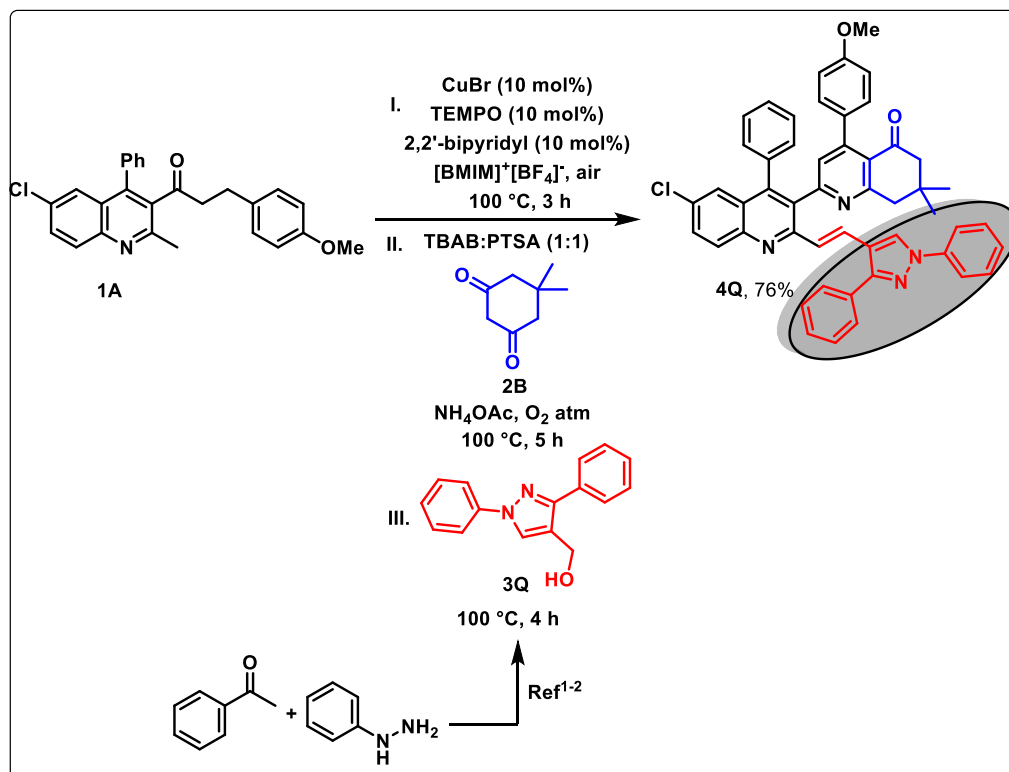

The synthesis of (1,3-diphenyl-1H-pyrazol-4-yl) methanol **3H** was performed according to previously published procedures<sup>1,2</sup>. To an oven-dried reaction vial, added alkylated ketone **1** (1 mmol), CuBr (10 mol%), TEMPO (10 mol%), and [BMIM]<sup>+</sup>[BF<sub>4</sub>]<sup>-</sup> (1.5 ml), and the reaction mixture was stirred at 100 °C for 3 h in the air atmosphere, resulting in the formation of chalcone **1A'**. Then TBAB:PTSA (1:1) (200mg), 1,3-Cyclohexanedione **2A** (1.5 mmol) and NH<sub>4</sub>OAc (10 mmol) were added and the reaction was continued at 100 °C for 5 h in the O<sub>2</sub> atmosphere, to form the cyclized intermediate **C**. After the formation of the cyclized intermediate **C**, alcohol **3Q** was added and the reaction was continued at 100 °C for 4 h to obtain C(sp<sup>3</sup>)-H functionalized quinolinyl quinolinone **4Q**. The progress of the reaction was monitored using TLC. After the reaction was completed, the reaction mixture was cooled to room temperature, diluted with water (40 ml), and then extracted with DCM (50 ml x 2). The combined organic layers were dried over anhydrous MgSO<sub>4</sub>, and the crude reaction mixture was purified by silica gel column chromatography using 15% EtOAc/Pet ether as eluent, to yield the desired product of C(sp<sup>3</sup>)-H functionalized quinolinyl quinolinone **4Q**.

**(E)-6'-chloro-2'-(2-(1,3-diphenyl-1H-pyrazol-4-yl)vinyl)-4-(4-methoxyphenyl)-7,7-dimethyl-4'-**

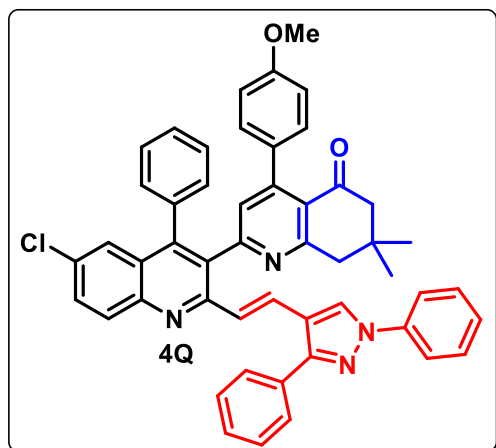

**phenyl-7,8-dihydro-[2,3'-biquinolin]-5(6H)-one (4Q).**

Purification was carried out by column chromatography on silica gel using a 15% ethyl acetate/Pet ether mixture, resulting in the isolation of **4Q** as a Dark brown solid (80% yield); mp: 274-276 °C;  $^1\text{H NMR}$  (400 MHz,  $\text{CDCl}_3$ )  $\delta$  8.15 – 8.01 (m, 3H), 7.72 (t,  $J = 7.5$  Hz, 4H), 7.65 (dd,  $J = 9.0$ , 1.8 Hz, 1H), 7.52 (d,  $J = 1.7$  Hz, 1H), 7.46 (t,  $J = 7.8$  Hz, 2H), 7.38 (dd,  $J = 14.8$ , 7.4 Hz, 3H), 7.31 (dd,  $J = 13.9$ , 7.5 Hz, 4H), 7.13 (s, 2H), 6.90 (dt,  $J = 14.9$ , 12.2 Hz, 5H), 6.79

(s, 1H), 3.82 (s, 3H), 2.98 (s, 2H), 2.53 (s, 2H), 1.08 (s, 6H).  $^{13}\text{C NMR}$  (101 MHz,  $\text{CDCl}_3$ )  $\delta$  197.9, 162.7, 159.6, 153.2, 152.5, 150.9, 139.6, 135.7, 133.1, 132.2, 132.0, 131.4, 131.0, 130.0, 129.5, 129.4, 128.7, 128.5, 128.2, 128.1, 128.0, 126.9, 126.8, 125.3, 123.4, 119.9, 119.1, 113.5, 55.3, 53.9, 47.5, 32.7, 29.7. **FT-IR:**  $\nu = 2931, 2141, 1692, 1510, 1364, 1242, 1145, 959, 830, 701, 543$   $\text{cm}^{-1}$ . **HRMS (ESI):**  $\text{C}_{51}\text{H}_{40}\text{ClN}_3\text{O}_2$  requires 763.2840 ( $\text{M} + \text{H}$ ) $^+$ ; found: 763.2849.

#### 2.4.2 Selective reduction of ketone

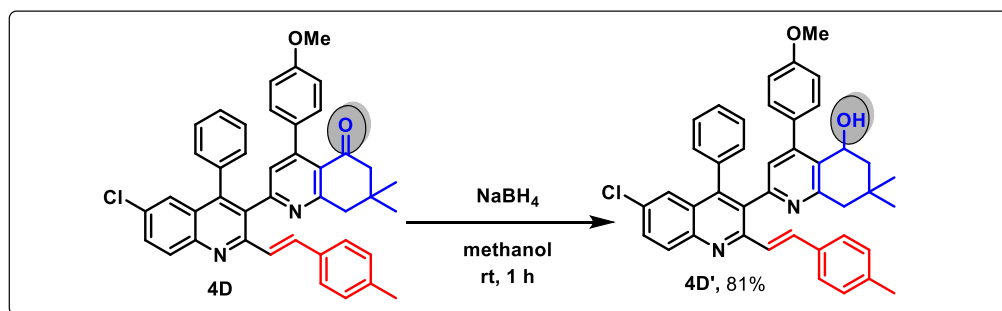

A previously established procedure was used for the selective reduction of the keto compound **4D**.<sup>3</sup> In a round-bottom flask Compound **4D** (1.0 mmol) was added and dissolved using methanol (10 ml), allowed to stir at room temperature for 5 mins. Then, sodium borohydride (0.5 mmol) was slowly added to the dissolved solution of **4D**, and the reaction was continued to be stirred at RT for 1 h. The progress of the reaction was monitored using TLC. After the reaction was completed, water was added to the reaction mixture. However, a white precipitate appeared, which was then completely filtered and dried under ambient air conditions to obtain the pure product **4D'** in 81% yield.



(*E*)-6'-chloro-4-(4-methoxyphenyl)-7,7-dimethyl-2'-(4-methylstyryl)-4'-phenyl-5,6,7,8-tetrahydro-[2,3'-biquinolin]-5-ol (**4D'**). Purification was carried out by column chromatography on silica gel using a

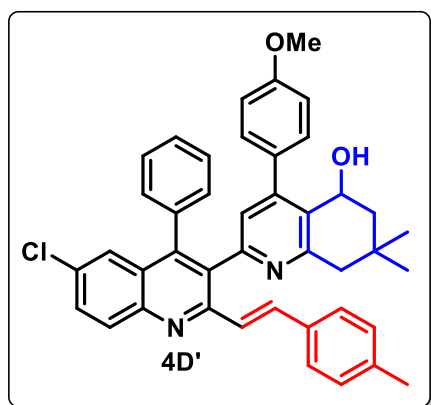

12% ethyl acetate/Pet ether mixture, resulting in the isolation of **4D'** as a Dark brown solid (81% yield); mp: 256-258 °C;  $^1\text{H}$  NMR (400 MHz,  $\text{CDCl}_3$ )  $\delta$  8.12 (d,  $J = 9.0$  Hz, 1H), 8.00 (d,  $J = 15.6$  Hz, 1H), 7.64 (dd,  $J = 9.0, 2.2$  Hz, 1H), 7.53 (d,  $J = 2.1$  Hz, 1H), 7.40 – 7.28 (m, 5H), 7.15 (dd,  $J = 15.4, 11.9$  Hz, 4H), 7.04 (dd,  $J = 21.3, 7.0$  Hz, 3H), 6.91 (d,  $J = 8.6$  Hz, 2H), 6.67 (s, 1H), 5.11 (d,  $J = 40.0$  Hz, 1H), 3.82 (s, 3H), 2.93 (d,  $J = 16.7$  Hz, 1H), 2.73 (d,  $J = 16.4$  Hz, 1H), 2.35 (s, 3H), 1.94 (dd,  $J = 13.4, 6.2$  Hz, 1H), 1.71 (dd,  $J = 13.6, 6.7$  Hz, 3H), 1.14 (s, 3H), 1.01 (s,

3H).  $^{13}\text{C}$  NMR (101 MHz,  $\text{CDCl}_3$ )  $\delta$  159.6, 156.8, 155.2, 154.0, 149.3, 146.8, 146.3, 138.5, 136.2, 135.5, 134.3, 132.8, 131.9, 131.1, 130.9, 130.6, 130.4, 129.3, 129.1, 128.9, 127.8, 127.4, 127.1, 126.6, 125.3, 125.1, 114.4, 65.1, 55.3, 47.3, 44.2, 30.5, 30.1, 27.4, 21.4. FT-IR:  $\nu = 2952, 1681, 1577, 1511, 1366, 1244, 1175, 1024, 834, 701, 538$   $\text{cm}^{-1}$ . HRMS (ESI):  $\text{C}_{42}\text{H}_{38}\text{ClN}_2\text{O}_2$  requires 637.2622 ( $\text{M} + \text{H}$ ) $^+$ ; found: 637.2632.

### 3. References

- 1 Y. Zhan, Q. Wei, J. Zhao and X. Zhang, *RSC Adv*, 2017, **7**, 48777–48784.
- 2 M. M. R. Badal, H. M. Ashekul Islam, M. Maniruzzaman and M. Abu Yousuf, *ACS Omega*, 2020, **5**, 22978–22983.
- 3 X. Lin, X. Wang, R. Li, Z. Wang, W. Liu, L. Chen, N. Chen, S. Sun, Z. Li, J. Hao, B. Lin and L. Xie, *ACS Omega*, 2022, **7**, 10994–11001.

## 4. Control Experiment

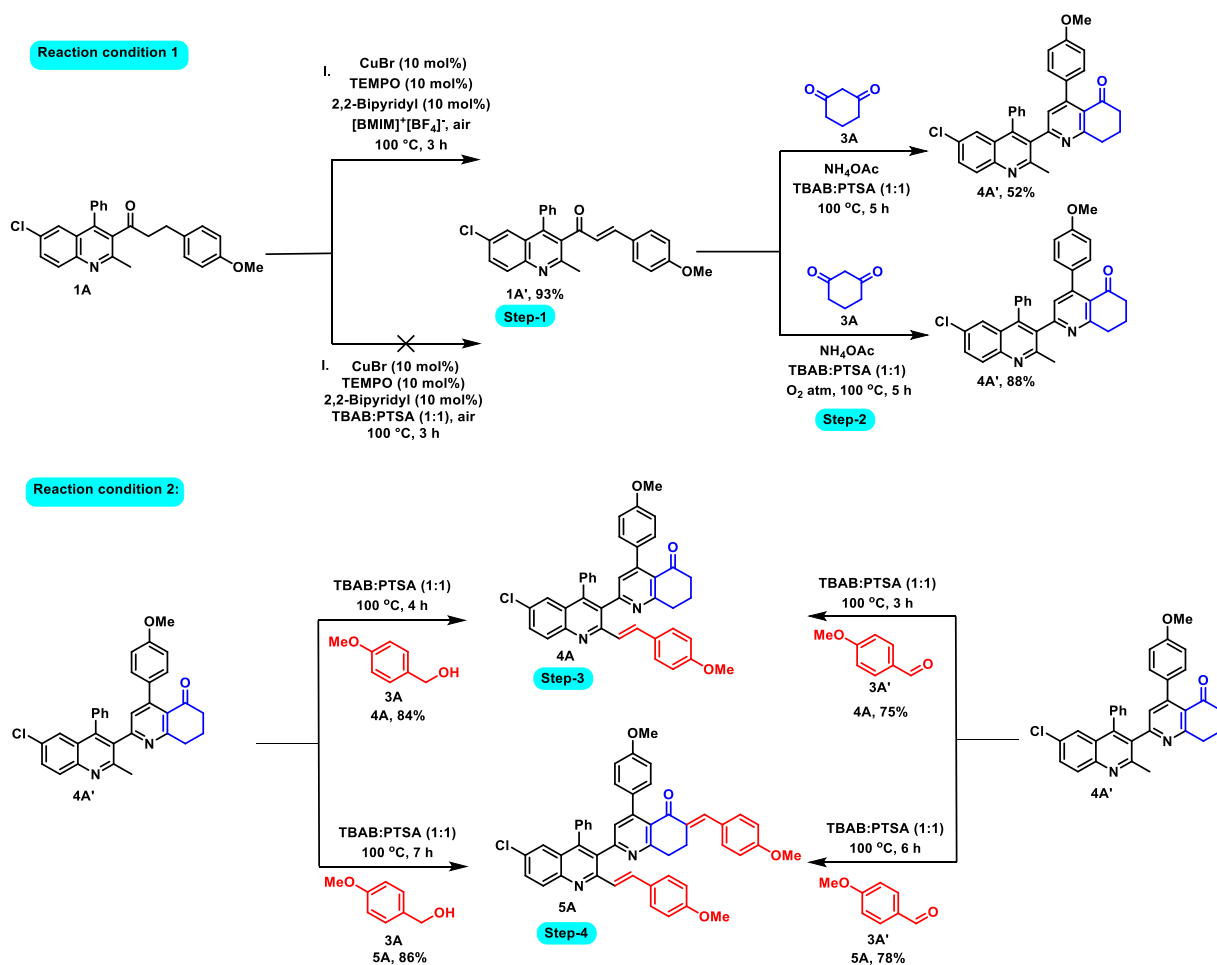

**Scheme S1** Control experiment study for the synthesis of **4** and **5**

### Reaction condition 1:

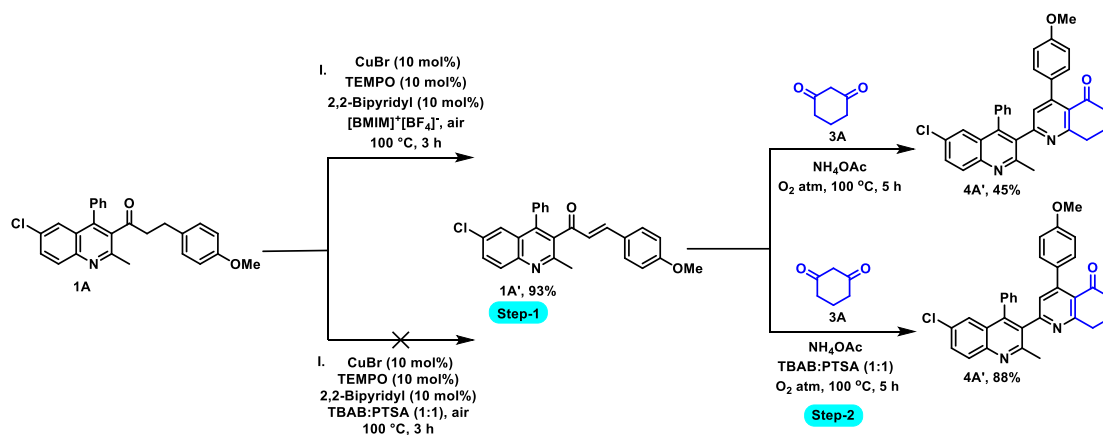

As illustrated in Scheme S1, a model reaction was examined using alkylated ketone **1A** as a starting material

followed by the addition of CuBr (10 mol%), TEMPO (10 mol%), 2,2-bipyridyl (10 mol%), and [BMIM]<sup>+</sup>[BF<sub>4</sub>]<sup>-</sup> (1.5 ml) which resulted in a 93% yield of the chalcone intermediate (**1A'**). Similarly, this reaction was also conducted in a DES medium but the formation of **1A'** was unsuccessful (Reaction condition 1, Step 1). From this observation, we found the crucial role of an ionic liquid in facilitating the formation of **1A'** from the alkylated ketone **1A**. In addition, the chalcone intermediate was isolated and confirmed by <sup>1</sup>H and <sup>13</sup>C NMR (Spectra are given on page 17). However, when **1A'** was treated with, diketone **3A**, NH<sub>4</sub>OAc in the O<sub>2</sub> atmosphere in the absence of DES, **4A'** was observed in a 45% yield. Conversely, when the same reaction was conducted in the presence of DES, the yield of **4A'** increased to 88%. In this context, it was found that DES significantly enhanced the reaction (Reaction condition 1, Step 2). Formation of **4A'** was characterized by <sup>1</sup>H and <sup>13</sup>C NMR (Spectra are given on page 18).

**(E)-1-(6-chloro-2-methyl-4-phenylquinolin-3-yl)-3-(4-methoxyphenyl)prop-2-en-1-one (1A')**. White solid

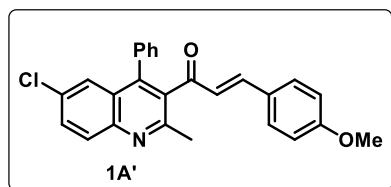

(93% yield); <sup>1</sup>H NMR (400 MHz, CDCl<sub>3</sub>) δ 8.06 (d, *J* = 9.0 Hz, 1H), 7.68 (dd, *J* = 8.9, 2.3 Hz, 1H), 7.57 (d, *J* = 2.2 Hz, 1H), 7.40 (d, *J* = 7.0 Hz, 3H), 7.30 – 7.26 (m, 4H), 7.04 (d, *J* = 16.2 Hz, 1H), 6.84 (d, *J* = 8.8 Hz, 2H), 6.49 (d, *J* = 16.2 Hz, 1H), 3.81 (s, 3H), 2.69 (s, 3H). <sup>13</sup>C NMR

(101 MHz, CDCl<sub>3</sub>) δ 197.1, 162.1, 155.5, 147.0, 146.1, 144.5, 134.6, 133.6, 132.4, 130.9, 130.5, 130.23, 129.9, 128.8, 128.5, 126.6, 126.2, 125.5, 125.1, 114.5, 55.4, 23.9.

**(6'-chloro-4-(4-methoxyphenyl)-2'-methyl-4'-phenyl-7,8-dihydro-[2,3'-biquinolin]-5(6H)-one (4')**. Pale brown solid (88% yield); <sup>1</sup>H NMR (400 MHz, CDCl<sub>3</sub>) δ 7.97 (d, *J* = 9.0 Hz, 1H), 7.57 (dd, *J* = 8.9, 2.3 Hz, 1H), 7.44 (d, *J* = 2.2 Hz, 1H), 7.31 – 7.25 (m, 3H), 7.07 (s, 2H), 6.78 (s, 4H), 6.64 (s, 1H), 3.74 (s, 3H), 3.10 (t, *J* = 6.1 Hz, 2H), 2.62 – 2.56 (m, 5H), 2.17 – 2.08 (m, 2H). <sup>13</sup>C NMR (101 MHz, CDCl<sub>3</sub>) δ 197.9, 164.1, 159.6, 159.5, 157.2, 151.5, 146.2, 145.9, 135.6, 132.8, 132.0, 131.6, 130.7, 130.5, 130.0, 129.2, 128.3, 128.2, 127.4, 126.7, 125.3, 124.5, 113.4, 55.2, 40.1, 33.5, 25.0, 21.5.

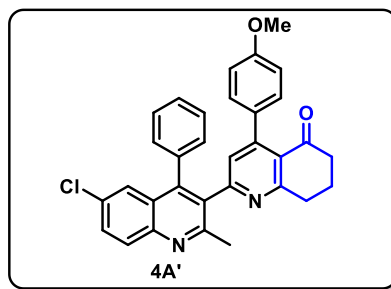

197.9, 164.1, 159.6, 159.5, 157.2, 151.5, 146.2, 145.9, 135.6, 132.8, 132.0, 131.6, 130.7, 130.5, 130.0, 129.2, 128.3, 128.2, 127.4, 126.7, 125.3, 124.5, 113.4, 55.2, 40.1, 33.5,

25.0, 21.5.

## Reaction condition 2:

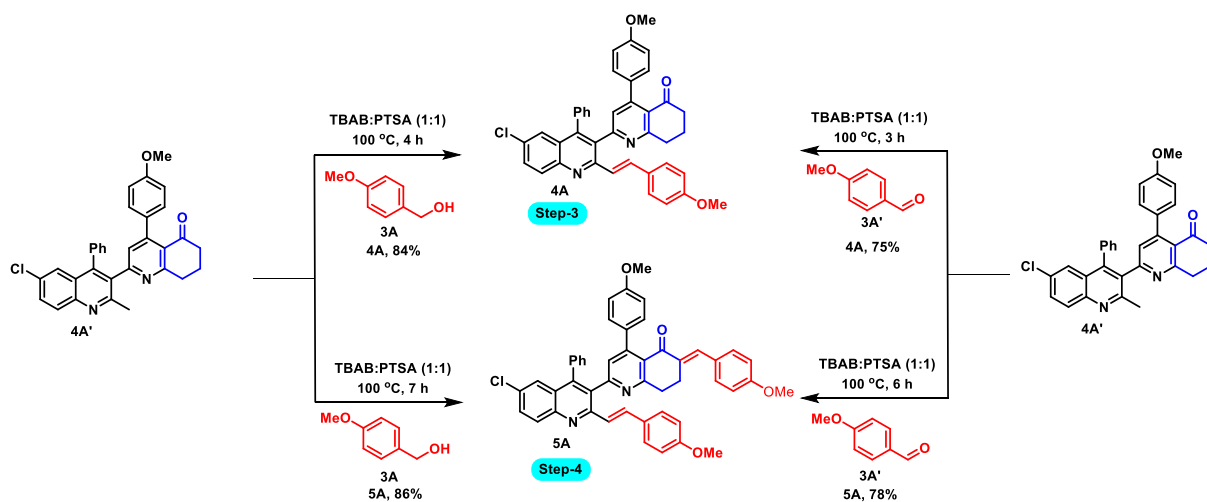

Meanwhile, the reaction was also performed by adding **3A** to intermediate **4A'** under DES condition and continued the reaction at 100 °C for 4 h, resulting in the formation of  $sp^3$  C-H functionalized quinolinyl quinolinone **4A** in 84% yield (Reaction condition 2, Step 3). Furthermore, by adding 3.0 mmol of **3A** under the same DES condition, the  $\alpha$ -alkenylated product **5A** was formed in 86% yield (Reaction condition 2, Step 4). Notably, when similar reactions were carried out by adding **3A'** instead of **3A**, the desired products **4A** & **5A** were obtained in 75% and 78% yields, respectively (Reaction condition 2, Steps 3 and 4).

**1A' <sup>1</sup>H NMR (400 MHz, CDCl<sub>3</sub>)**

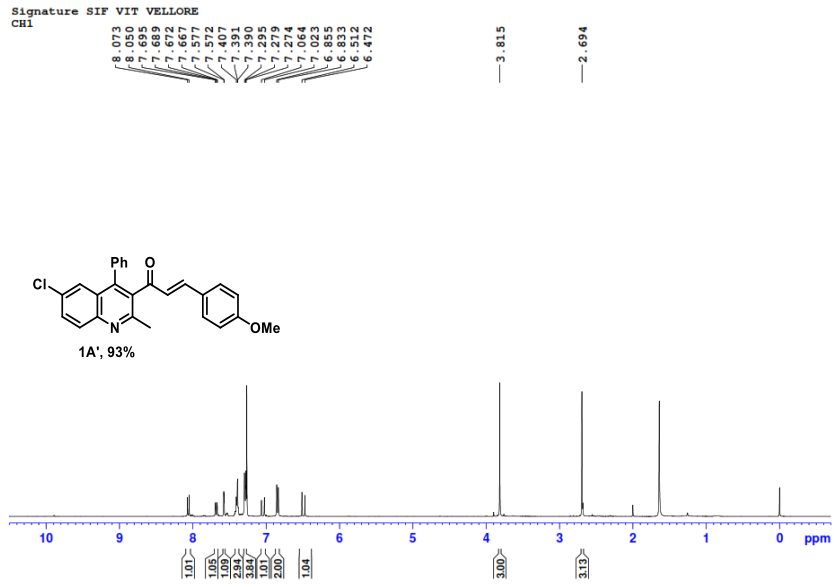

**1A' <sup>13</sup>C NMR (101 MHz, CDCl<sub>3</sub>)**

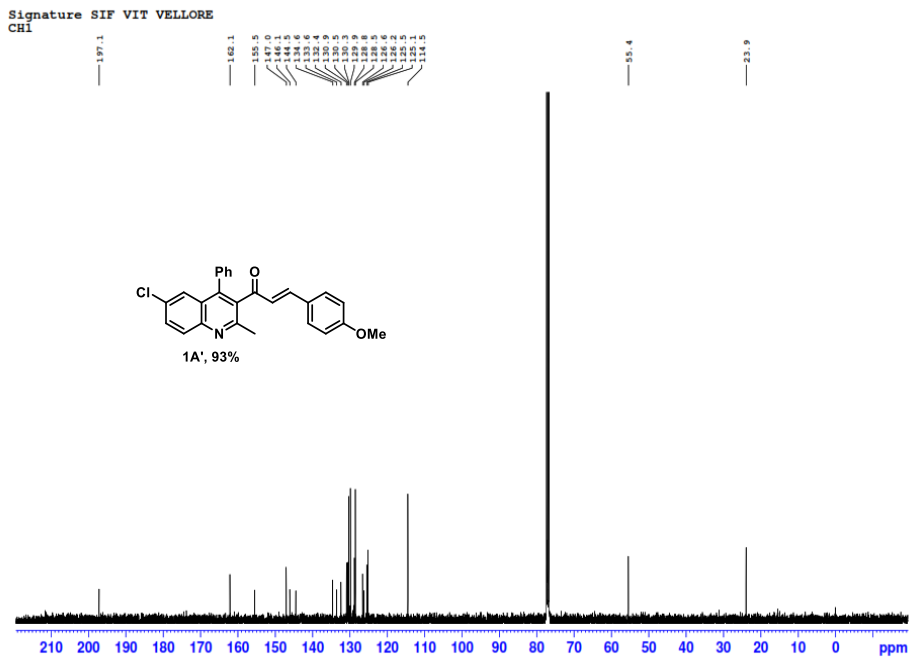

4A' <sup>1</sup>H NMR (400 MHz, CDCl<sub>3</sub>)

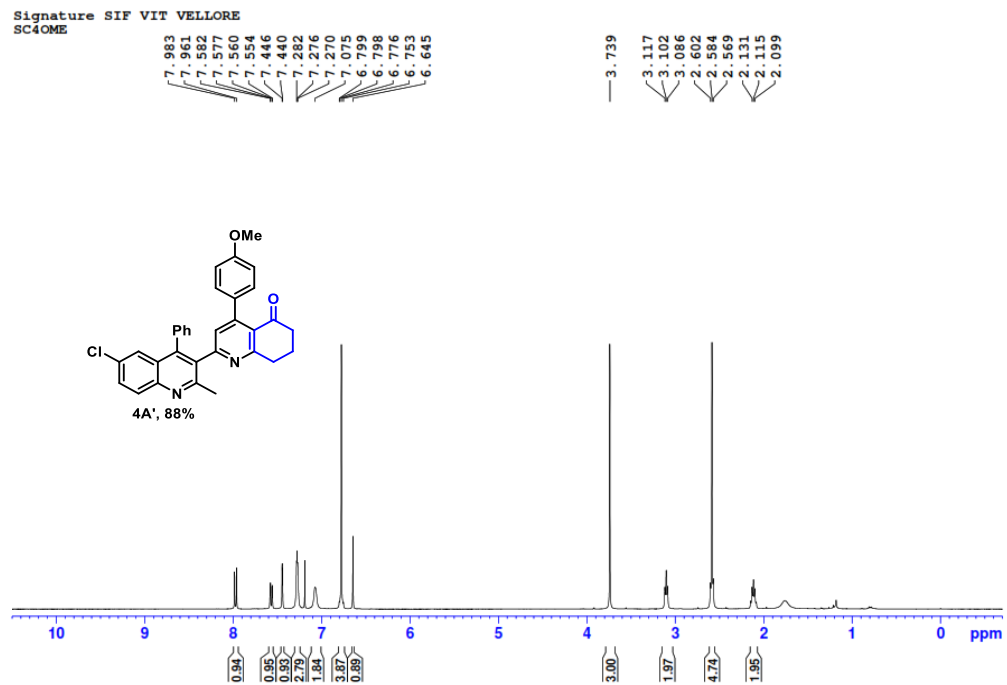

4A' <sup>13</sup>C NMR (101 MHz, CDCl<sub>3</sub>)

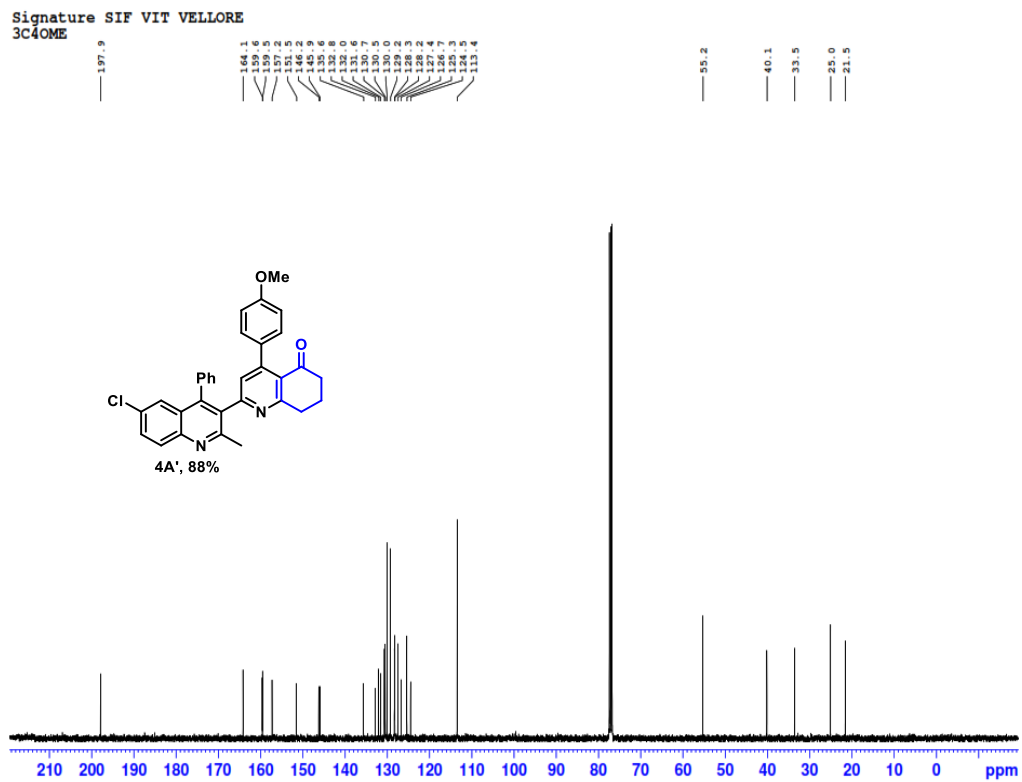

## 5. Reaction Monitoring by $^1\text{H}$ NMR Analysis

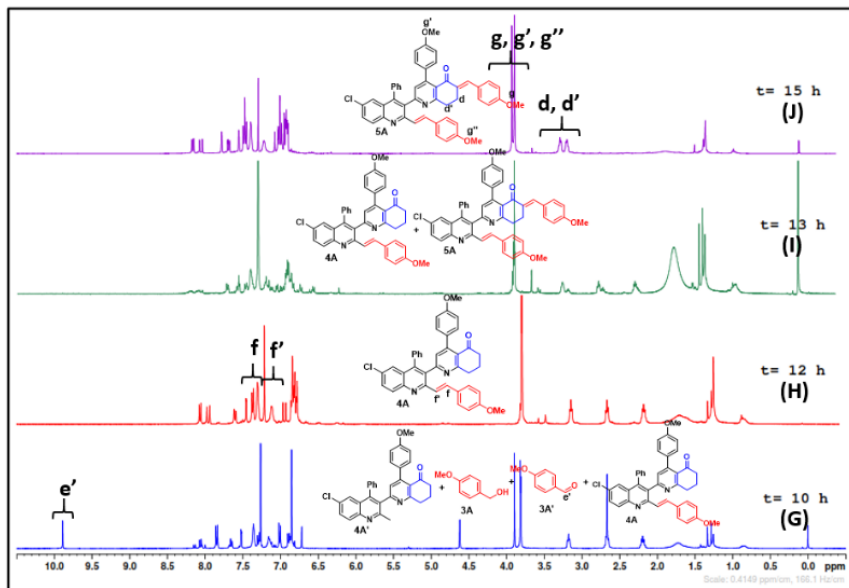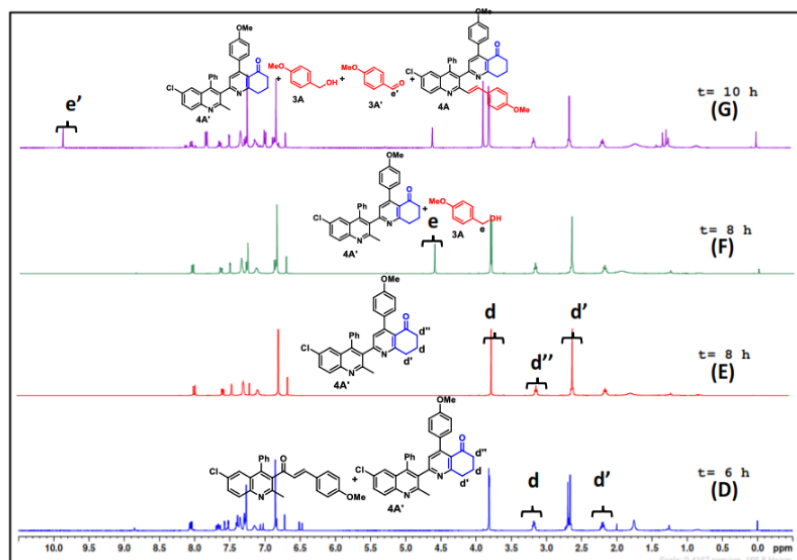

### 5.1 Reaction monitoring by $^1\text{H}$ NMR analysis for the synthesis of 4 & 5

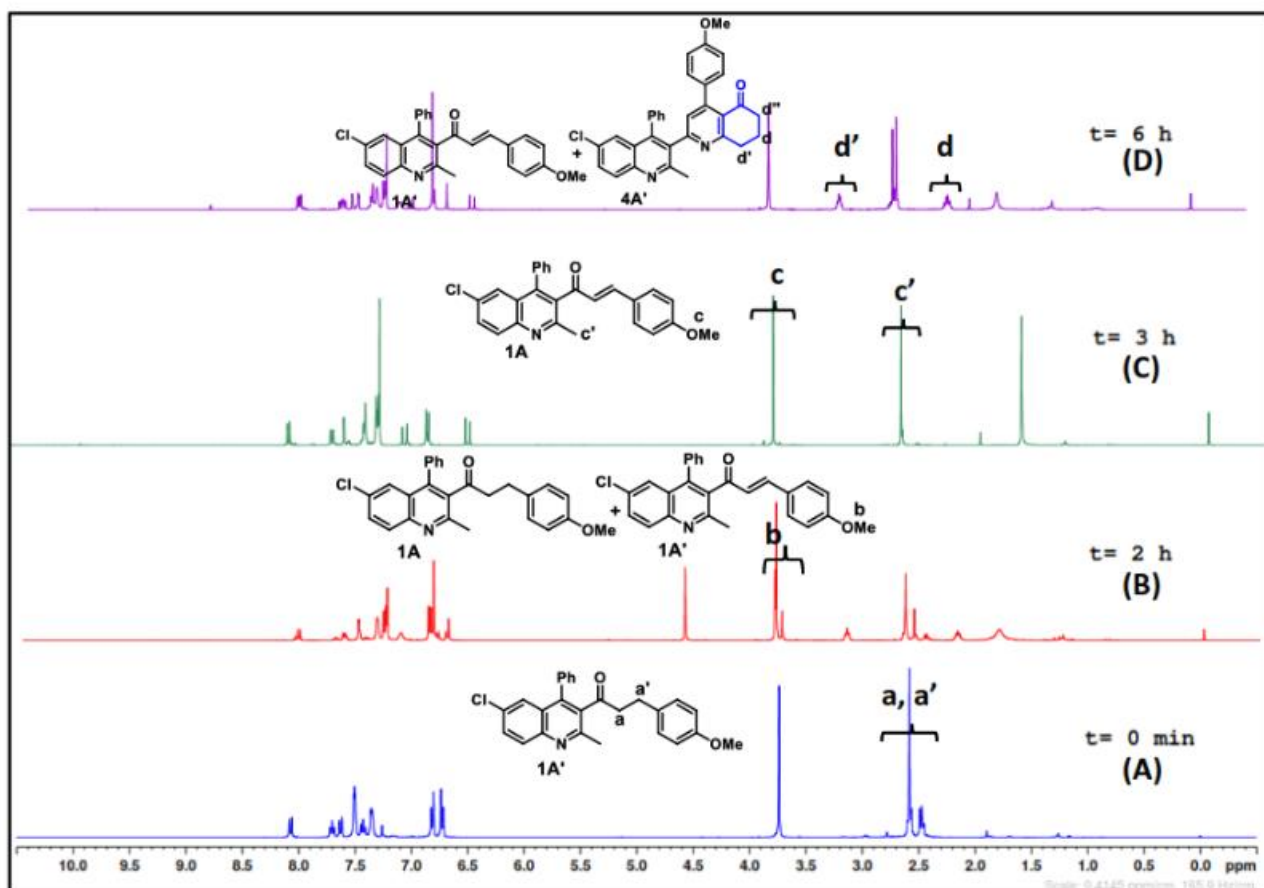

Fig S1 Reaction monitoring by  $^1\text{H}$  NMR analysis in different time intervals for the synthesis of **4** & **5**

The  $^1\text{H}$  NMR studies have been conducted to elucidate the mechanism of the sequential reaction in the synthesis of compounds **4** and **5**. The  $^1\text{H}$  NMR spectrum of **A** was taken for the alkylated ketone **1A**, before the initiation of the reaction, revealing the aliphatic  $\text{CH}_2$  protons in the range of 2.4-2.6 ppm. The Spectrum **B** recorded after 2 h shows the formation of the chalcone intermediate **1A'** as well as alkylated ketone **1A**, evidenced by the appearance of  $\text{H}-\text{C}=\text{C}-\text{H}$  protons at 6.8 and 7.7 ppm. The Spectrum **C**, recorded over a period of 3 h, revealed the exclusive formation of the chalcone intermediate **1A'**, confirmed by the disappearance of the aliphatic  $\text{CH}_2$  peaks. The Spectrum **D** and Spectrum **E** were recorded at 6 h and 8 h time intervals, shows the formation of 7,8-dihydro-[2,3'-biquinolin]-5(6H)-one **4A'**, as evidenced by the appearance of aliphatic  $\text{CH}_2$  peaks in the range of 2.0-2.1 ppm. Spectrum **F** was recorded after the addition of 4-methoxy benzyl alcohol **3A** to intermediate **4A'**, represented by the benzylic  $\text{CH}_2$  appearing at 4.6 ppm. The spectrum **G** was recorded after 10 h, showing the formation of dehydrogenation of benzyl alcohol **3A'**. This was confirmed by the appearance of  $-\text{CHO}$  proton at 10 ppm along with  $\text{C}(\text{sp}^3)-\text{H}$  functionalized 7,8-dihydro-[2,3'-biquinolin]-5(6H)-one **4A**. Spectrum **H** was recorded over a period of 12 h, showing that the reaction was completed with the formation of  $\text{C}(\text{sp}^3)-\text{H}$  functionalized 7,8-dihydro-[2,3'-biquinolin]-5(6H)-one **4A**, confirmed by the disappearance of aliphatic methyl protons in **4A'** and the appearance of **4A** olefinic protons at 7.2 and 7.6 ppm. Similarly, by adding



an excess amount (3.0 mmol) of alcohol **3A** and continuing the reaction for 15 h, the formation of the Knoevenagel product **5A** was observed. This is confirmed by the disappearance of aliphatic CH<sub>2</sub> protons adjacent to the keto group and the appearance of -C=C-H protons at 7.1 ppm and H-C=C-H protons at 7.3 and 7.7 ppm. All spectra (**Fig S1**) were recorded by performing the reactions according to the standard reaction procedure.

## 6. Optical Spectral Data of Products 4 and 5

Table S1 Photophysical properties of **4** & **5**

| Compound  | $\lambda_{\text{abs}}$ (nm) | $\lambda_{\text{em}}$ (nm) | Stoke shift (nm) | $\Phi_F$ (%) |
|-----------|-----------------------------|----------------------------|------------------|--------------|
| <b>4A</b> | 305                         | 442                        | 137              | 2.48         |
| <b>4B</b> | 297                         | 426                        | 129              | 1.17         |
| <b>4C</b> | 298                         | 420                        | 122              | 0.72         |
| <b>4D</b> | 303                         | 430                        | 127              | 0.33         |
| <b>4E</b> | 288                         | 445                        | 157              | 0.26         |
| <b>4F</b> | 298                         | 528                        | 117              | 1.19         |
| <b>4G</b> | 304                         | 441                        | 137              | 0.50         |
| <b>4H</b> | 302                         | 507                        | 205              | 0.23         |
| <b>4I</b> | 300                         | 510                        | 210              | 0.49         |
| <b>4J</b> | 298                         | 439                        | 141              | 2.88         |
| <b>4K</b> | 299                         | 360                        | 61               | 0.32         |
| <b>4L</b> | 297                         | 417                        | 120              | 0.53         |
| <b>4M</b> | 300                         | 414                        | 114              | 0.29         |
| <b>4N</b> | 302                         | 414                        | 112              | 0.32         |
| <b>4O</b> | 301                         | 415                        | 114              | 0.41         |
| <b>4P</b> | 297                         | 411                        | 114              | 0.31         |
| <b>4Q</b> | 278                         | 448                        | 170              | 0.58         |
| <b>5A</b> | 289                         | 440                        | 151              | 5.73         |
| <b>5B</b> | 329                         | 438                        | 109              | 1.36         |
| <b>5C</b> | 361                         | 442                        | 81               | 0.22         |
| <b>5D</b> | 316                         | 438                        | 122              | 0.62         |
| <b>5E</b> | 324                         | 426                        | 102              | 0.42         |
| <b>5F</b> | 317                         | 510                        | 193              | 0.15         |

The spectral data were measured in DCM solutions at RT, in concentrations ranging from ( $1.0 \times 10^{-5}$  M to  $5.0 \times 10^{-6}$  M) for absorption and emission. The Fluorescence quantum yield ( $\pm 10\%$ ) was determined relative to quinine sulfate in 0.1 M H<sub>2</sub>SO<sub>4</sub> ( $\Phi_F = 0.54$ ) as the standard.

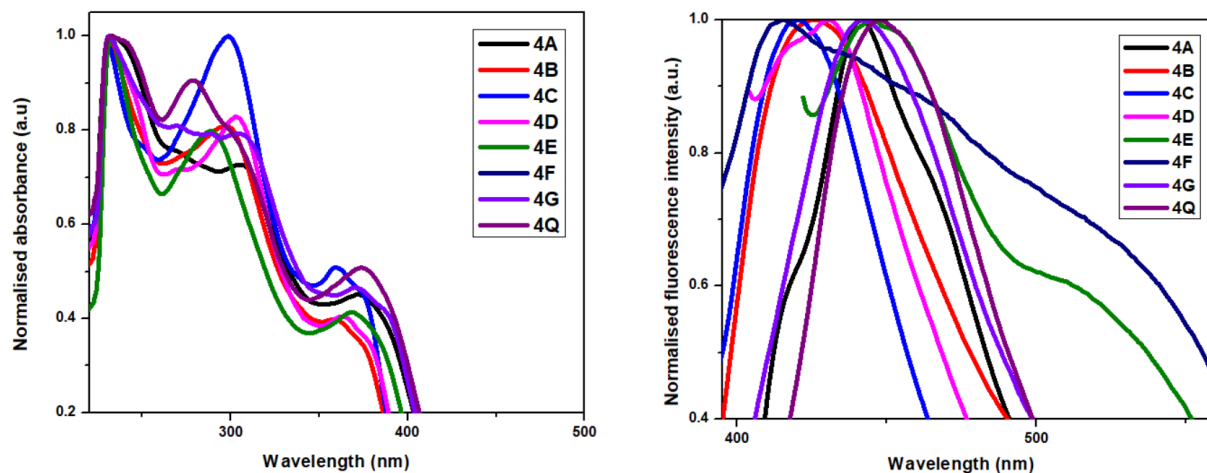

Fig S2 Normalized UV/vis and emission spectra of compounds 4A-4G and 4Q

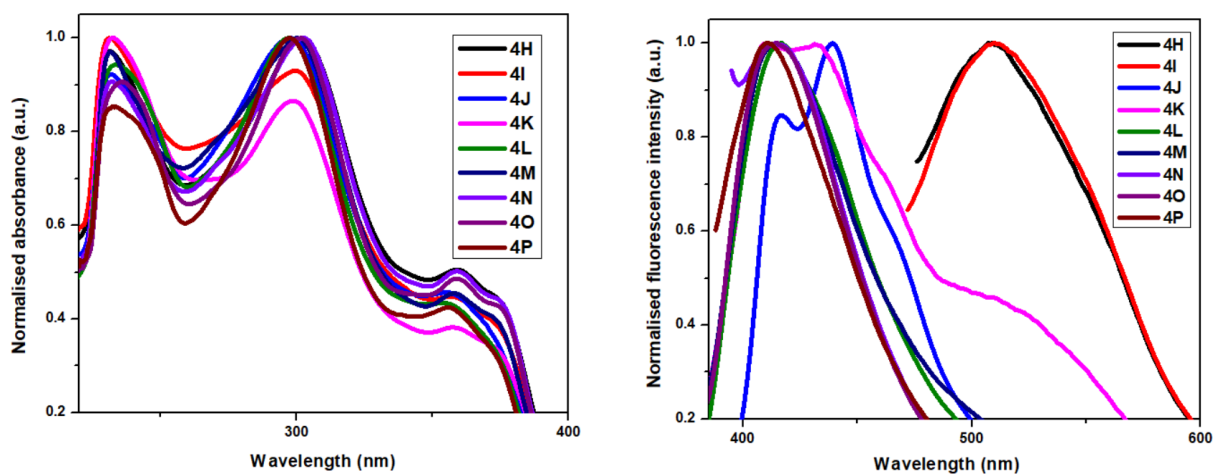

Fig S3 Normalized UV/vis and emission spectra of compounds 4H-4P

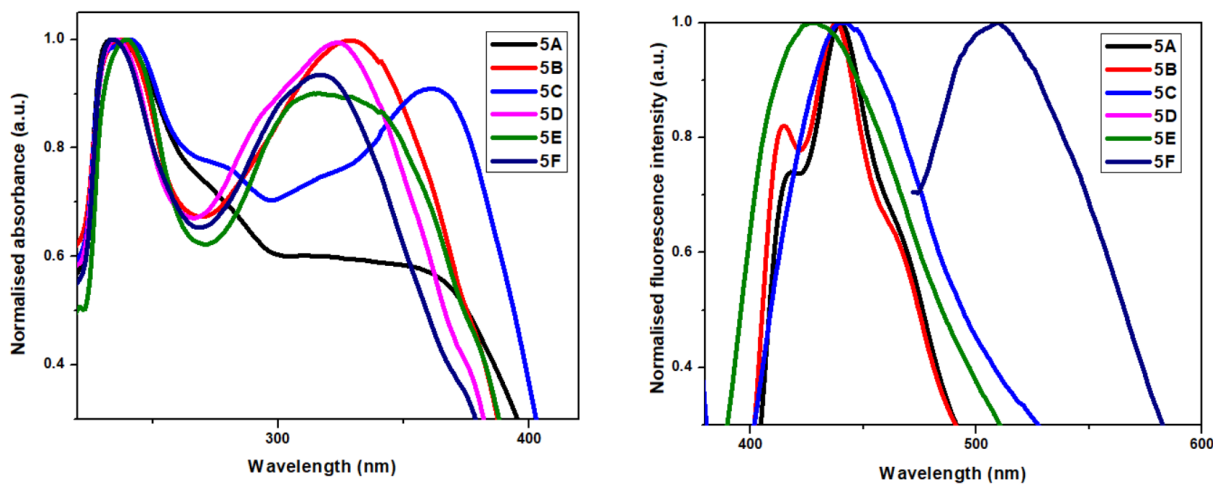

Fig S4 Normalized UV/vis and emission spectra of compounds 5A-5F

## 4. Copies of NMR ( $^1\text{H}$ & $^{13}\text{C}$ ), FT-IR and HRMS Spectra

### 4A $^1\text{H}$ NMR (400 MHz, $\text{CDCl}_3$ )

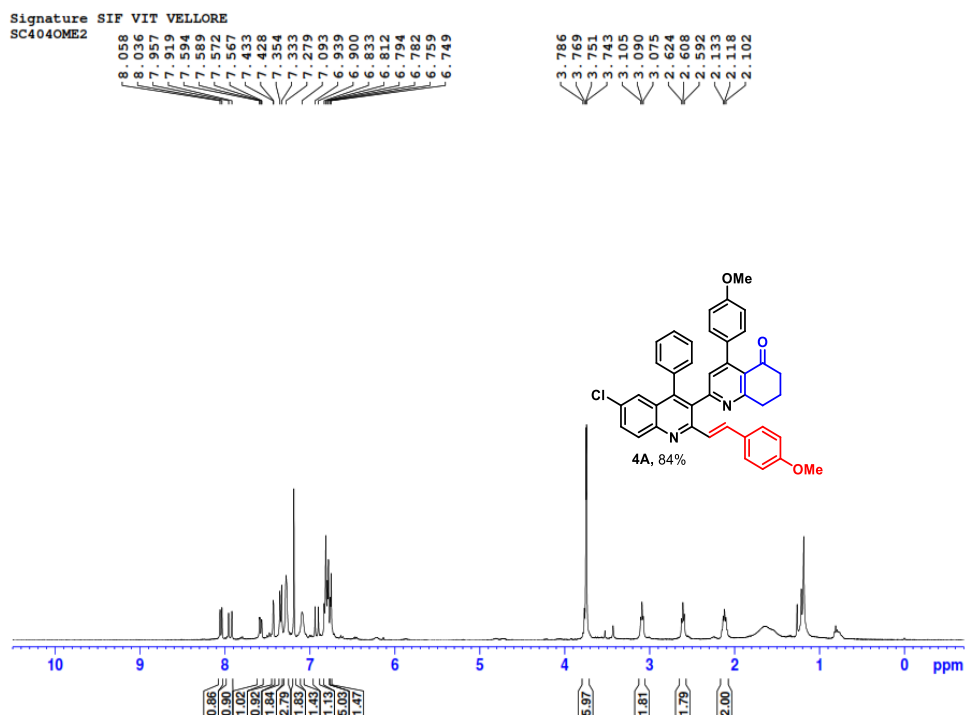

### 4A $^{13}\text{C}$ NMR (101 MHz, $\text{CDCl}_3$ )

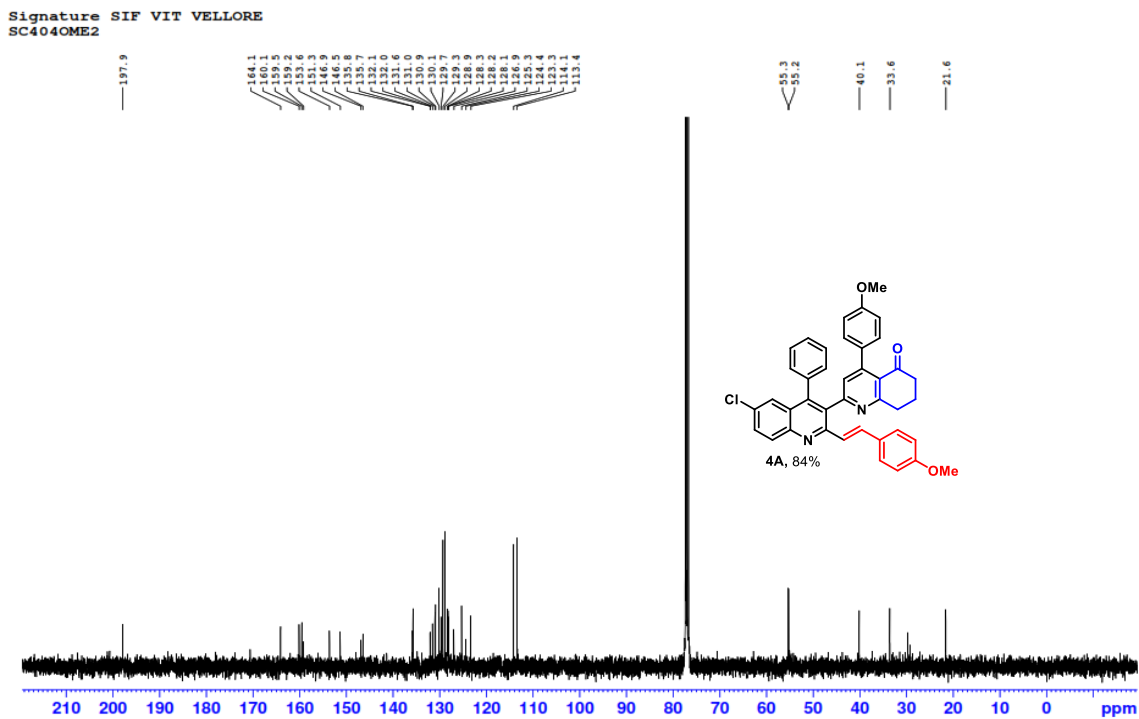

### 4A FTIR

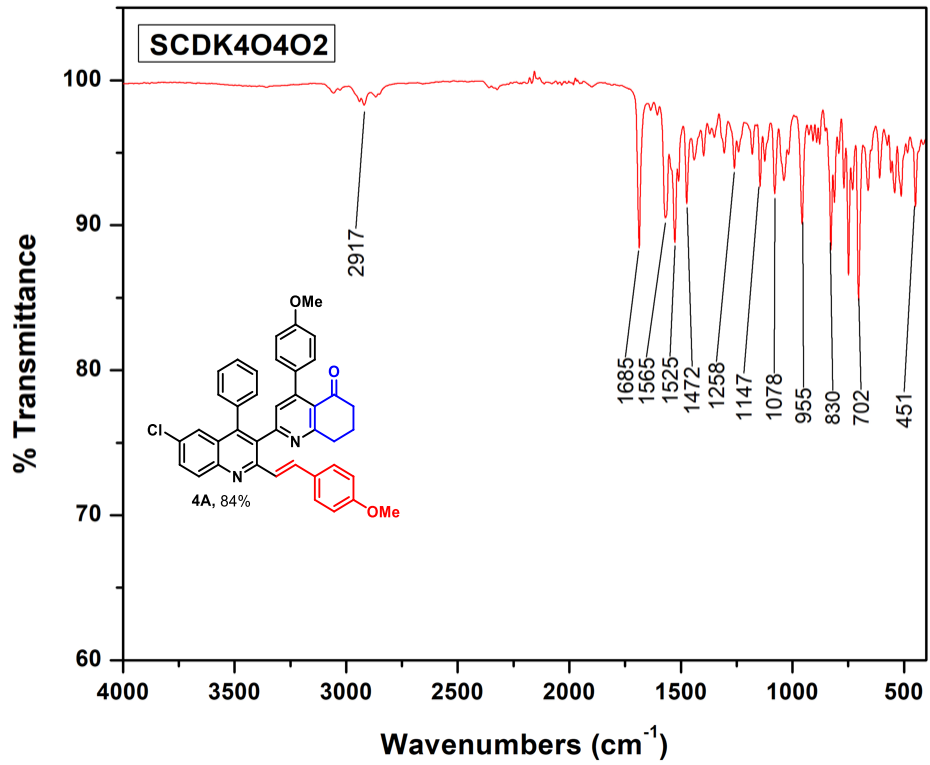

### 4A HRMS (ESI)

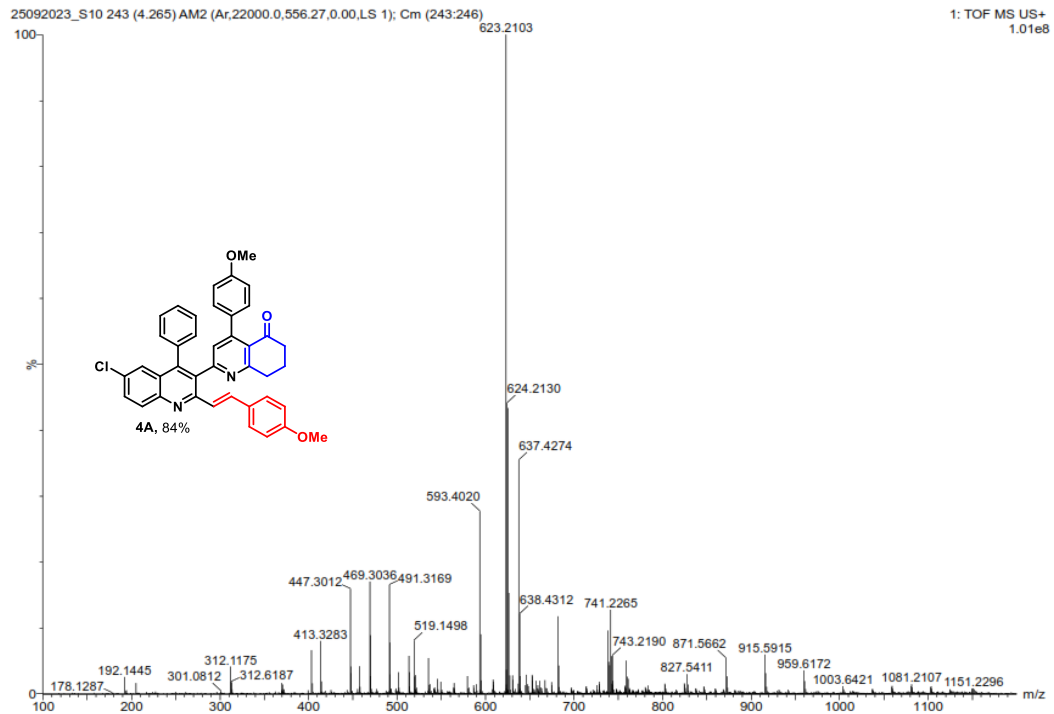

**4B**  $^1\text{H}$  NMR (400 MHz,  $\text{CDCl}_3$ )

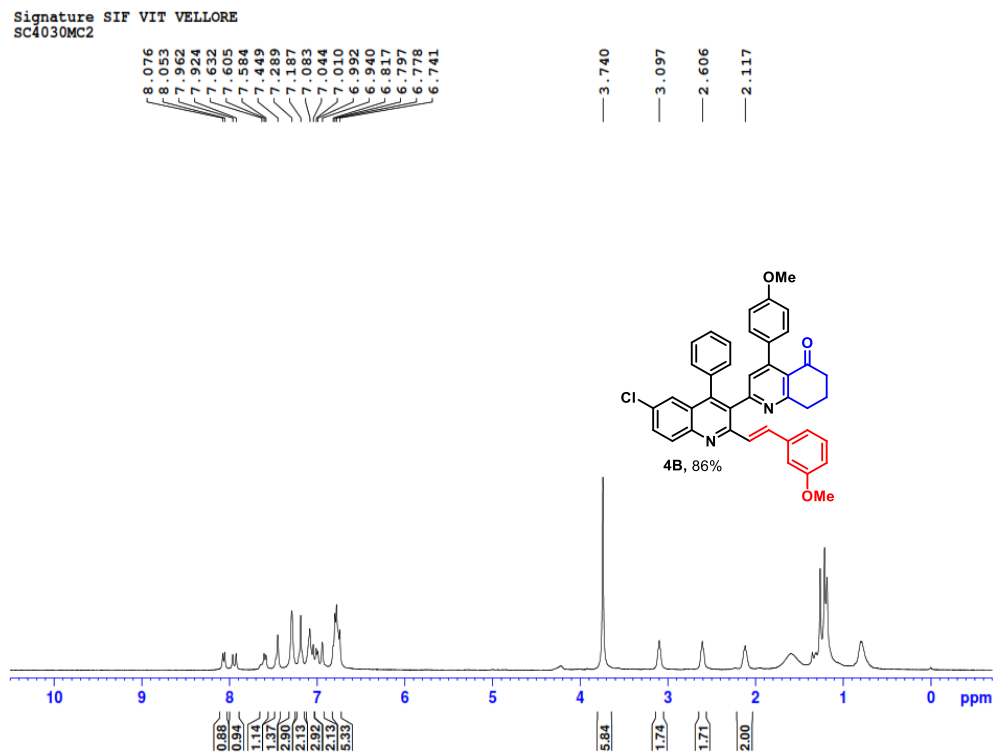

**4B**  $^{13}\text{C}$  NMR (101 MHz,  $\text{CDCl}_3$ )

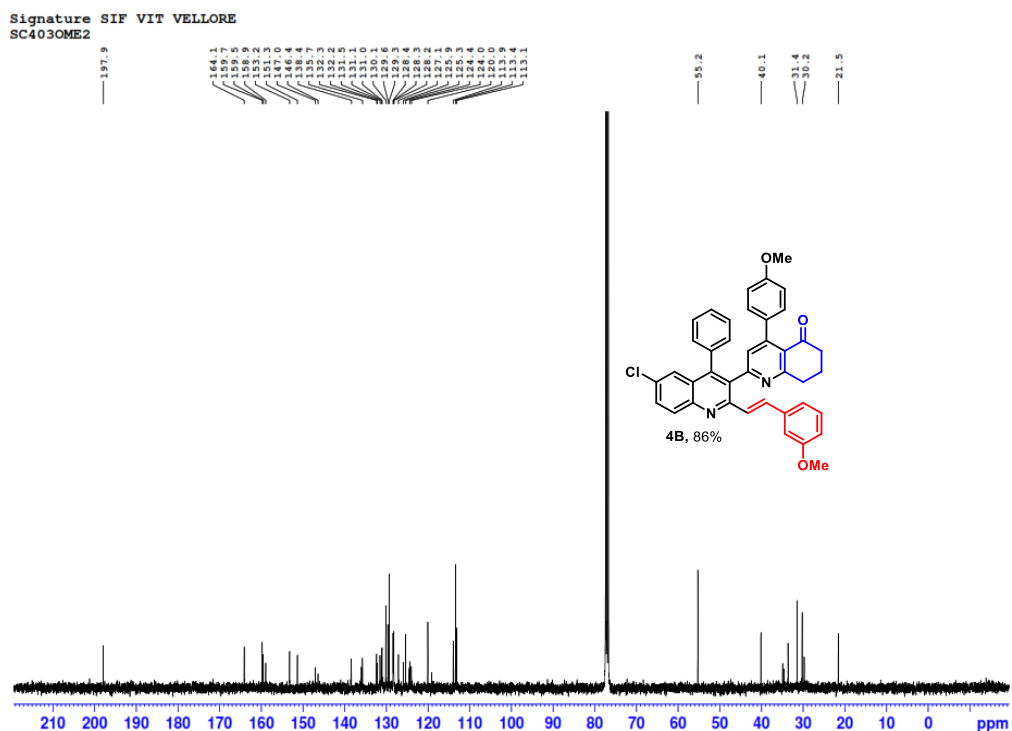

## 4B FTIR

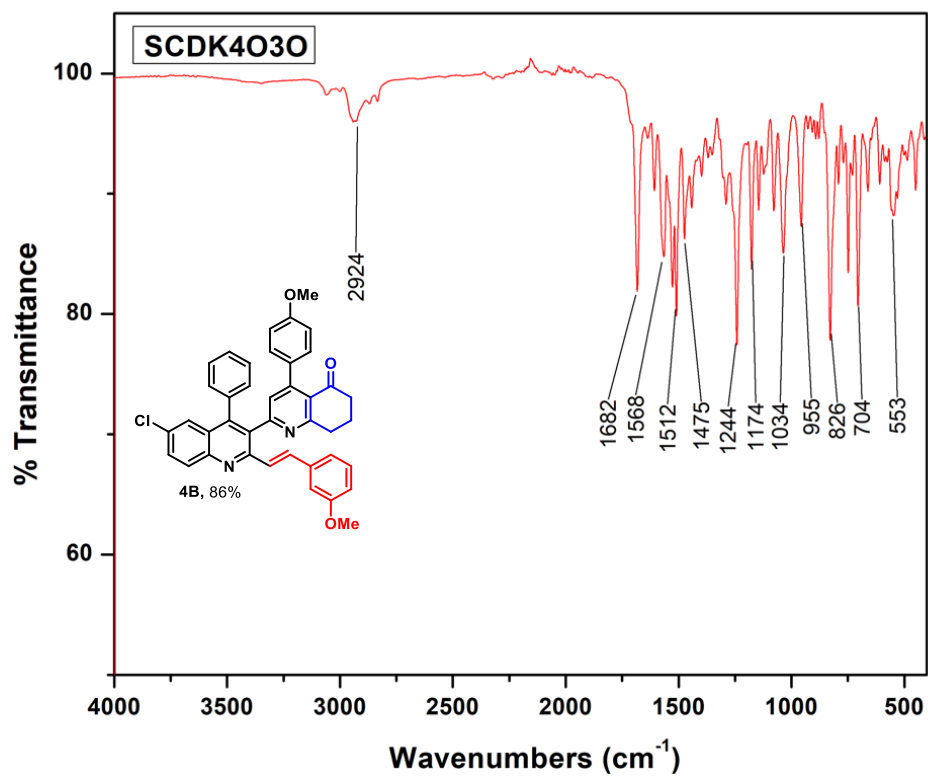

## 4B HRMS (ESI)

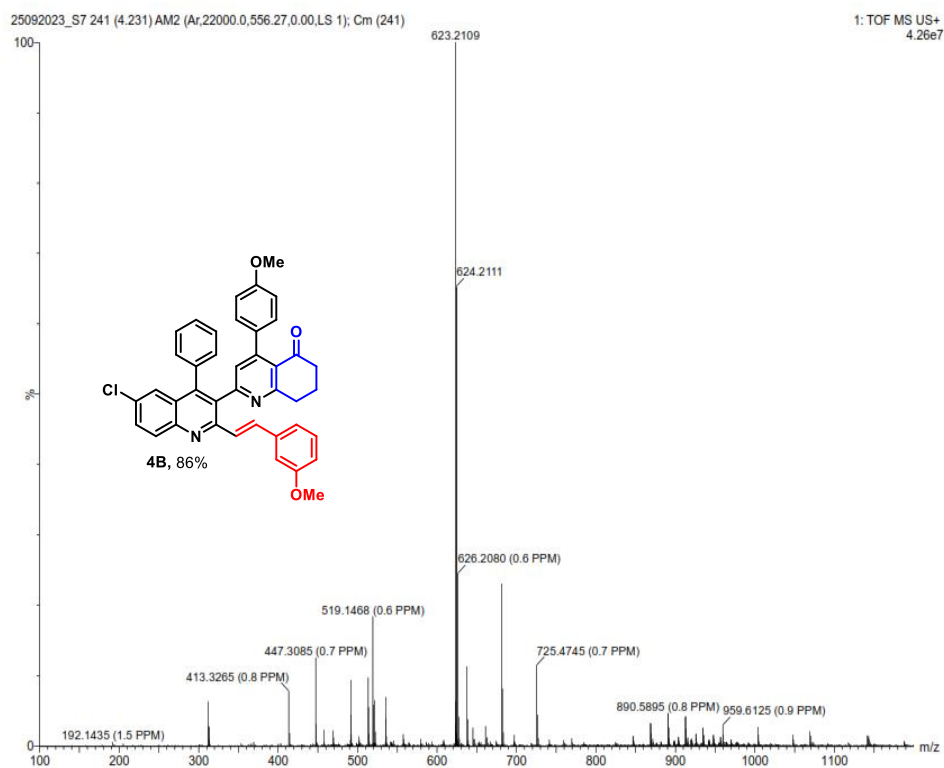

4C <sup>1</sup>H NMR (400 MHz, CDCl<sub>3</sub>)

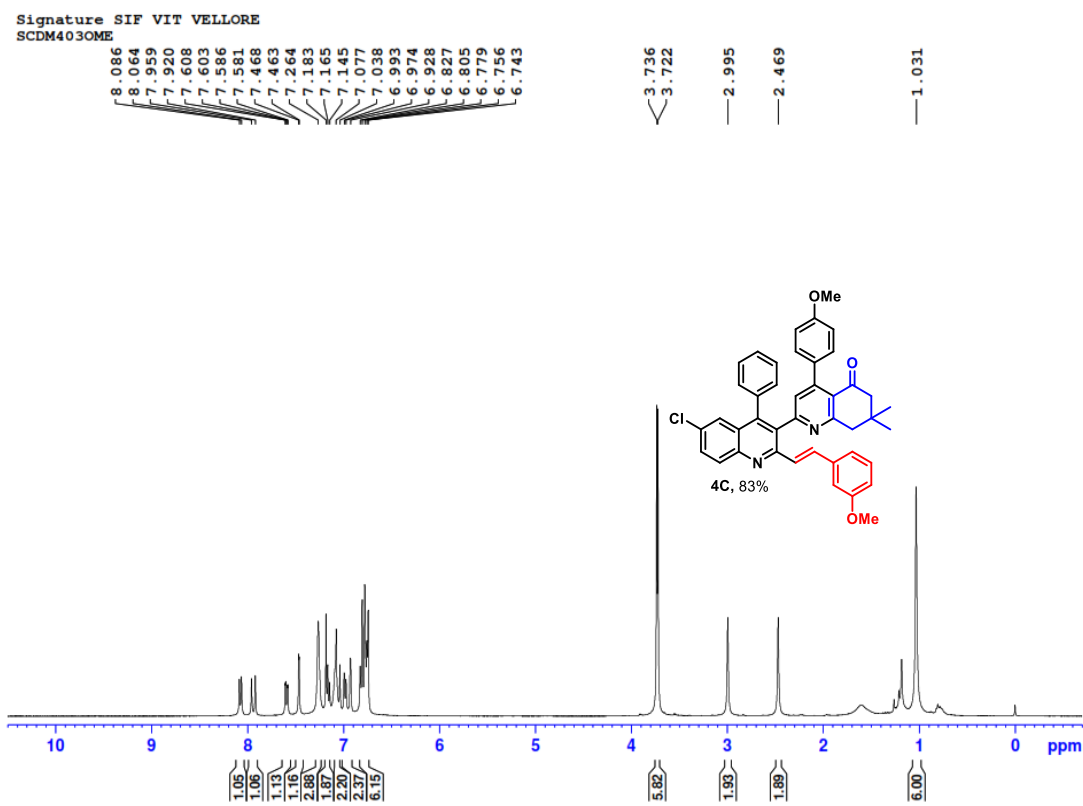

4C <sup>13</sup>C NMR (101 MHz, CDCl<sub>3</sub>)

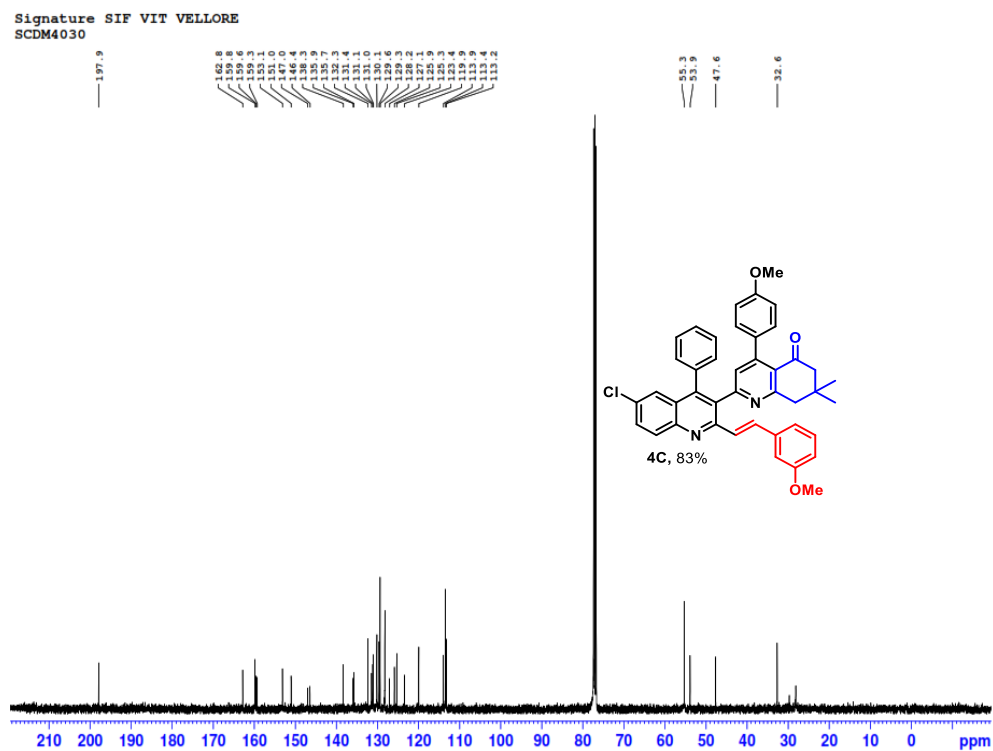

#### 4C FTIR

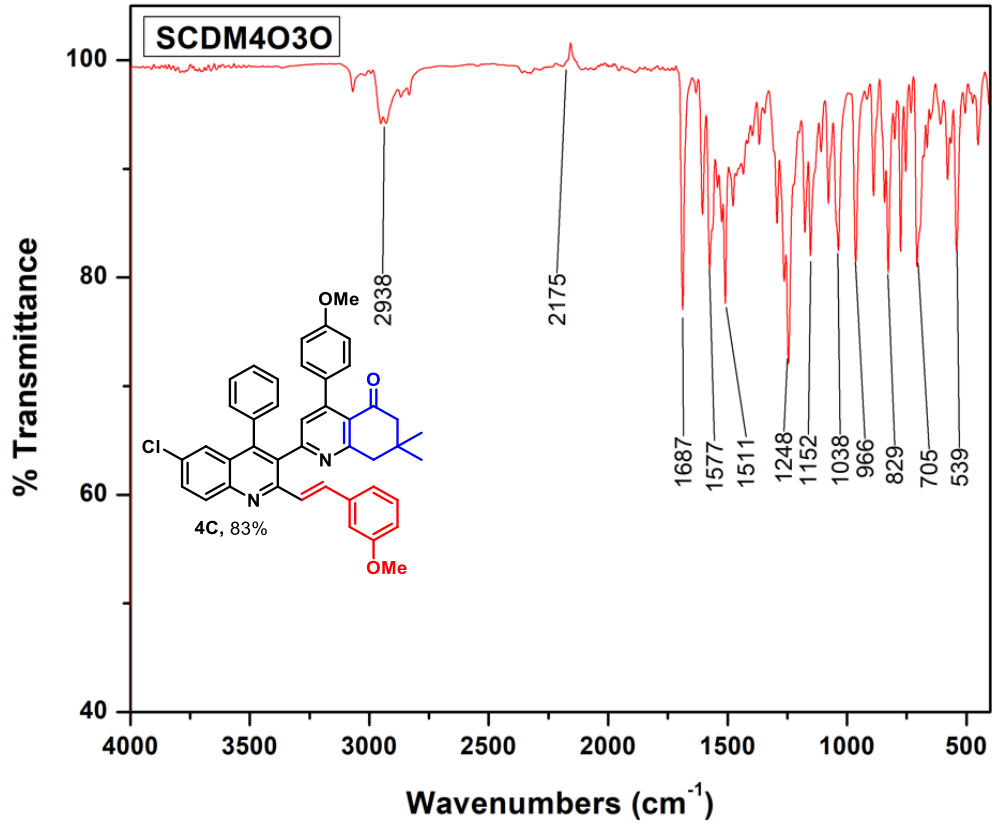

#### 4C ESI (HRMS)

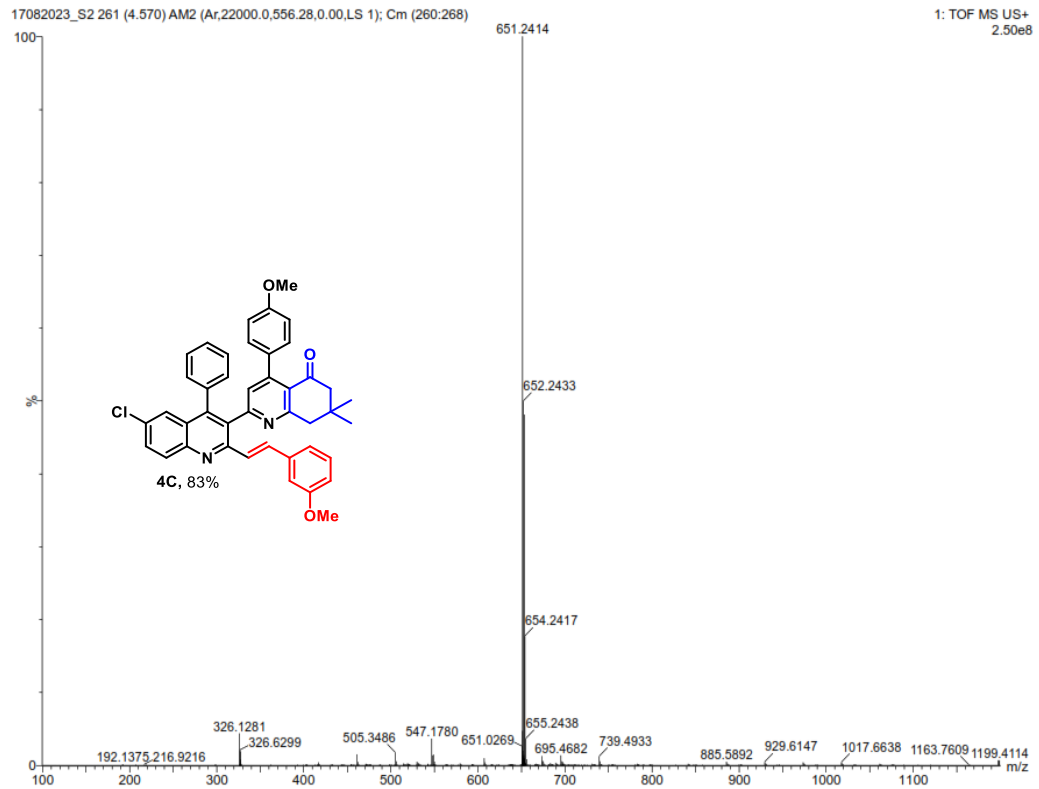



4D <sup>1</sup>H NMR (400 MHz, CDCl<sub>3</sub>)

Signature SIF VIT VELLORE  
SCDMO4PT

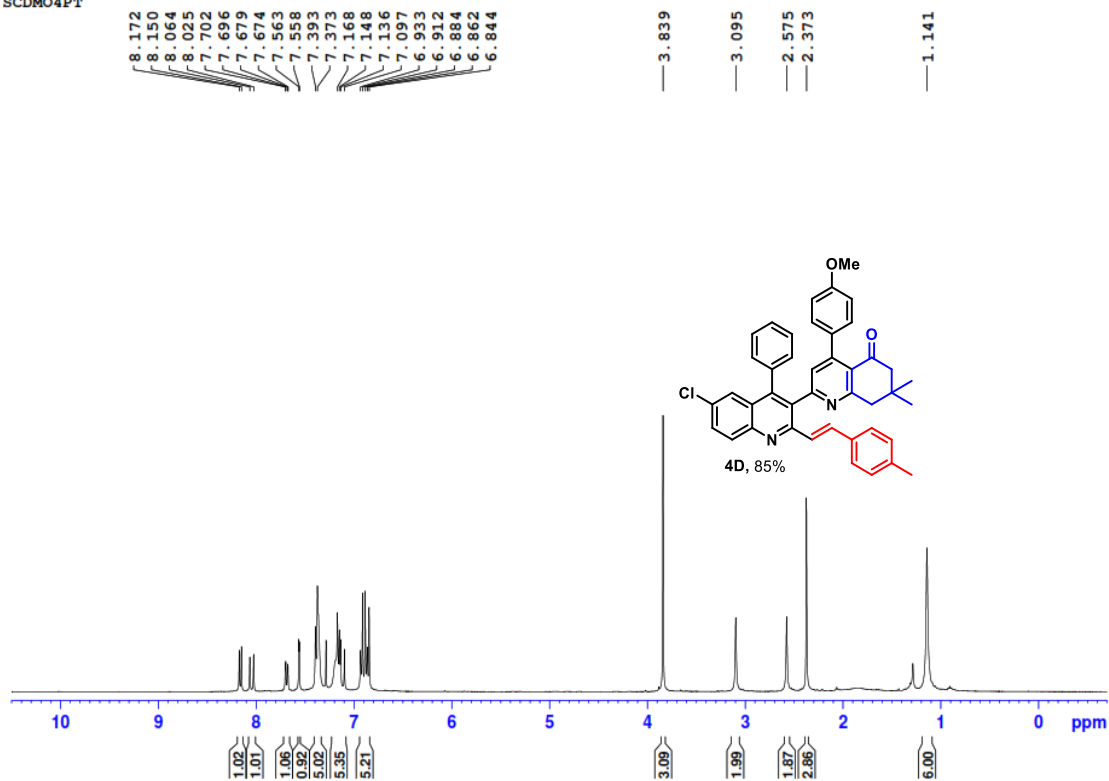

4D <sup>13</sup>C NMR (101 MHz, CDCl<sub>3</sub>)

Signature SIF VIT VELLORE  
SCDMO4PT

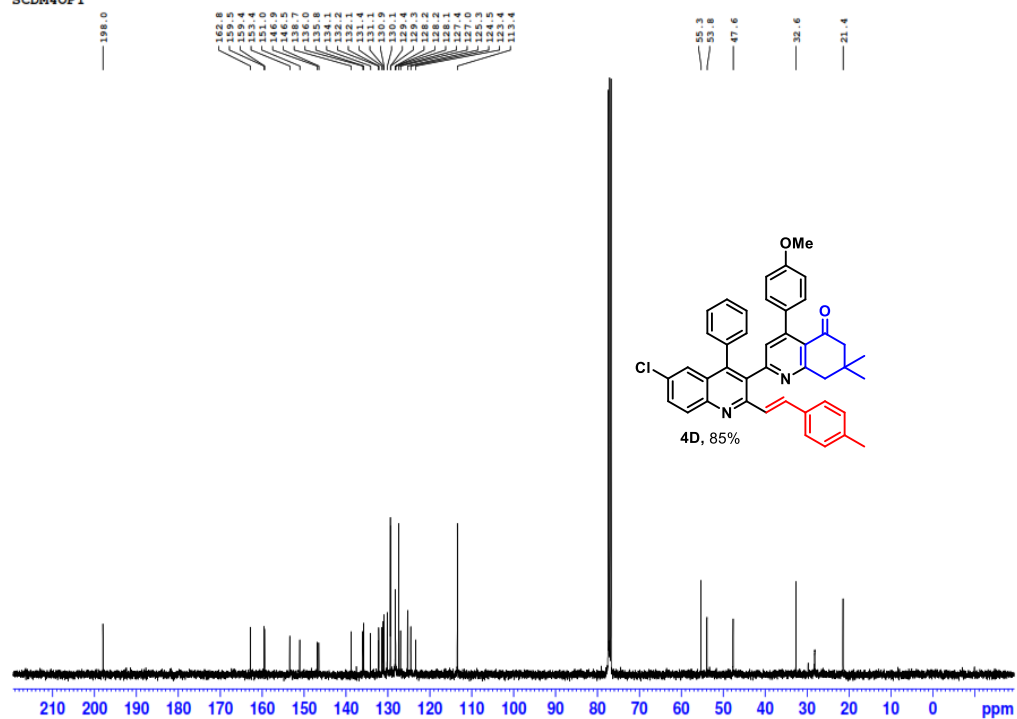

### 4D FTIR

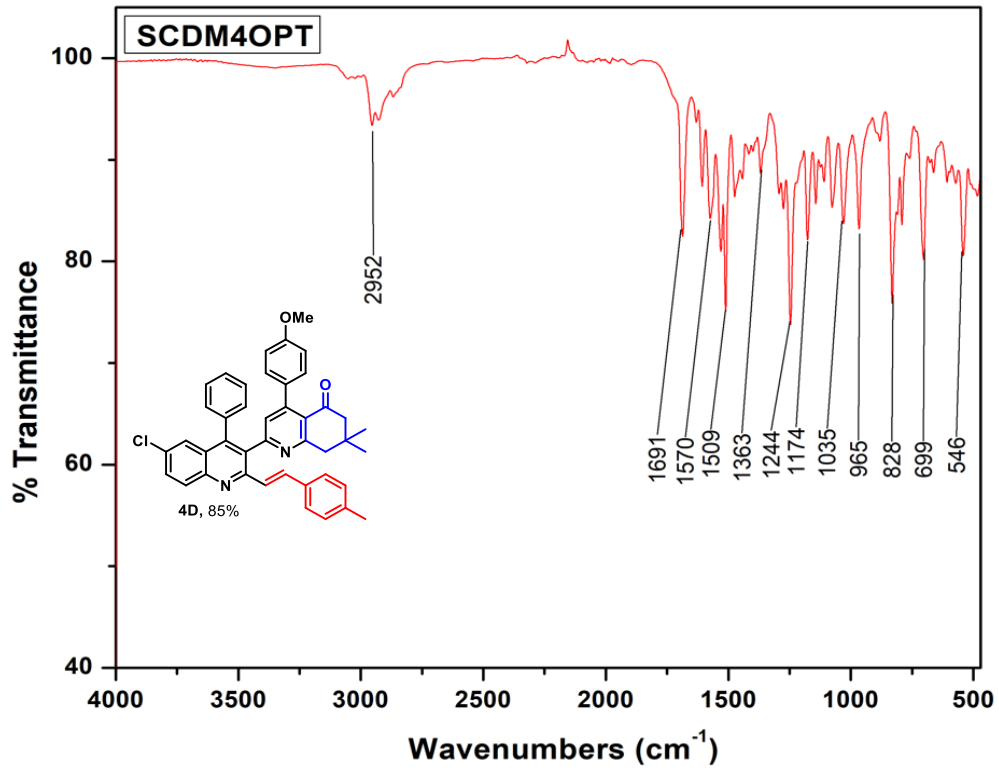

### 4D ESI (HRMS)

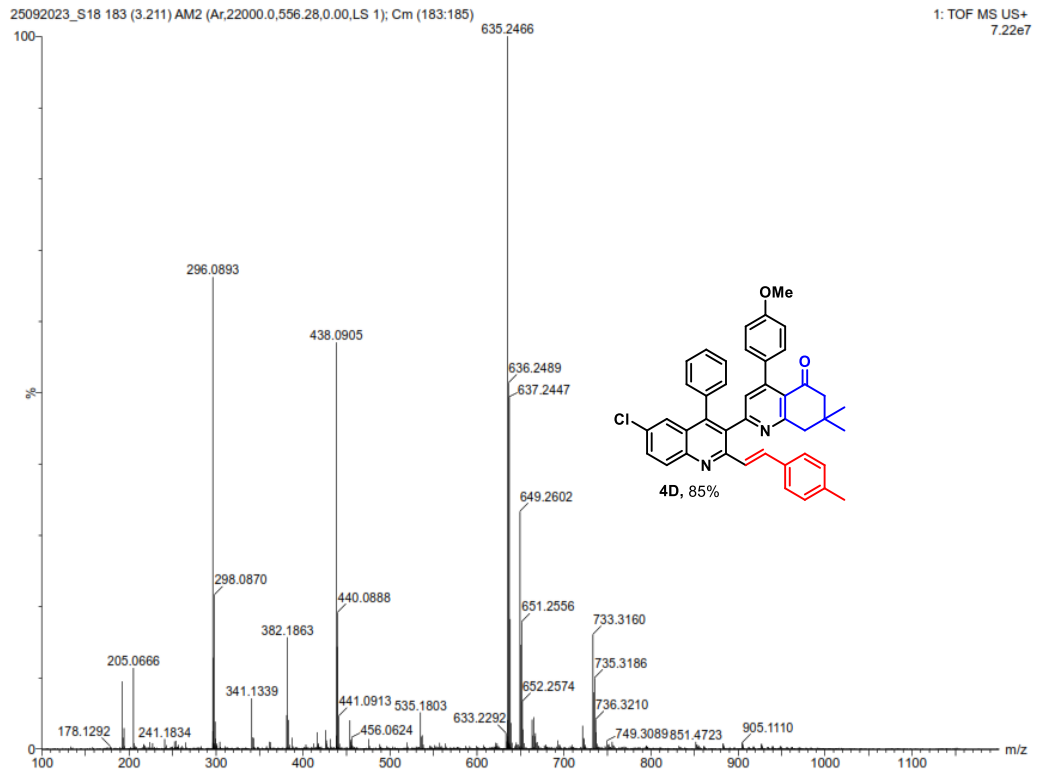

4D' <sup>1</sup>H NMR (400 MHz, CDCl<sub>3</sub>)

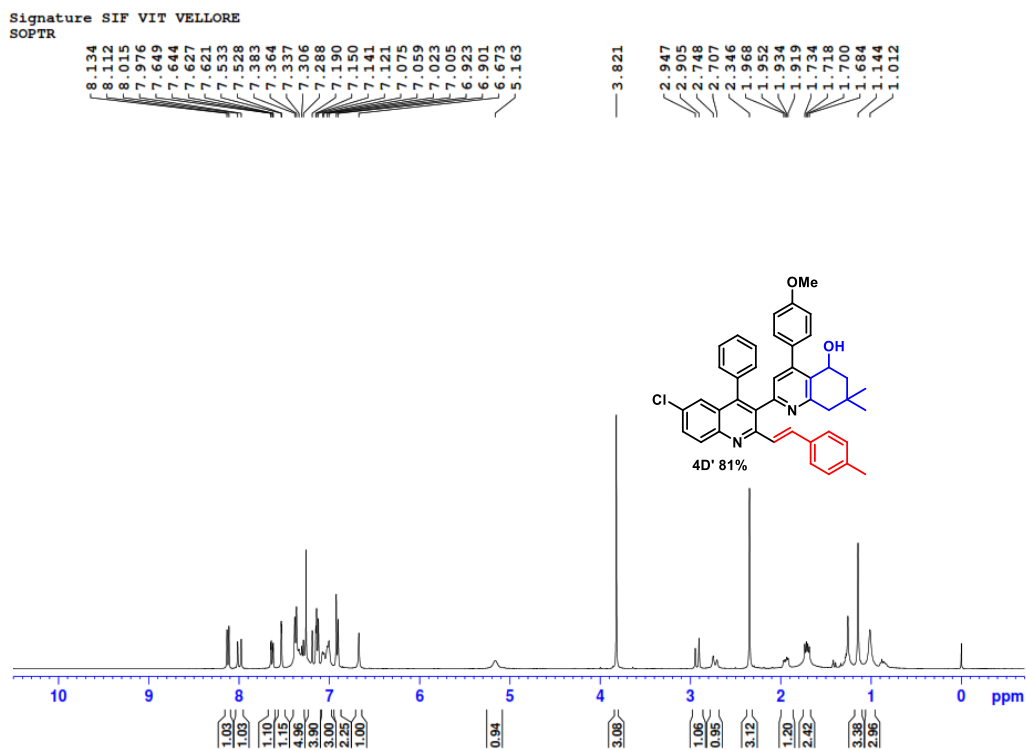

4D' <sup>13</sup>C NMR (101 MHz, CDCl<sub>3</sub>)

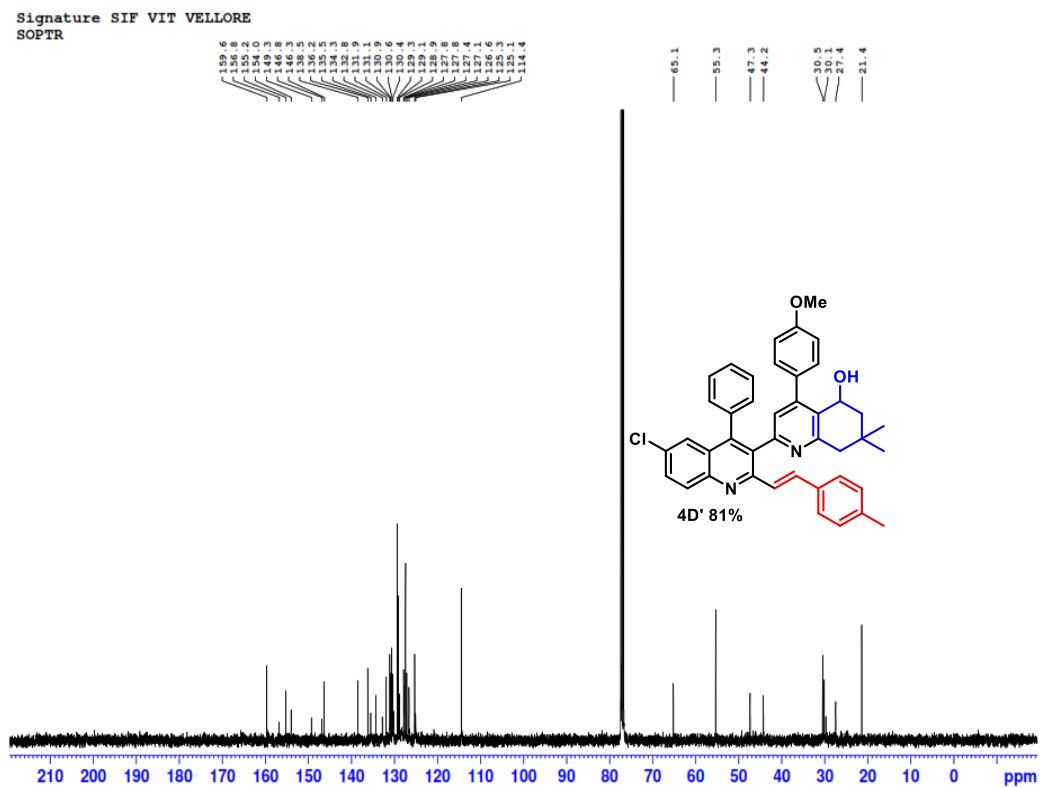

### 4D' FTIR

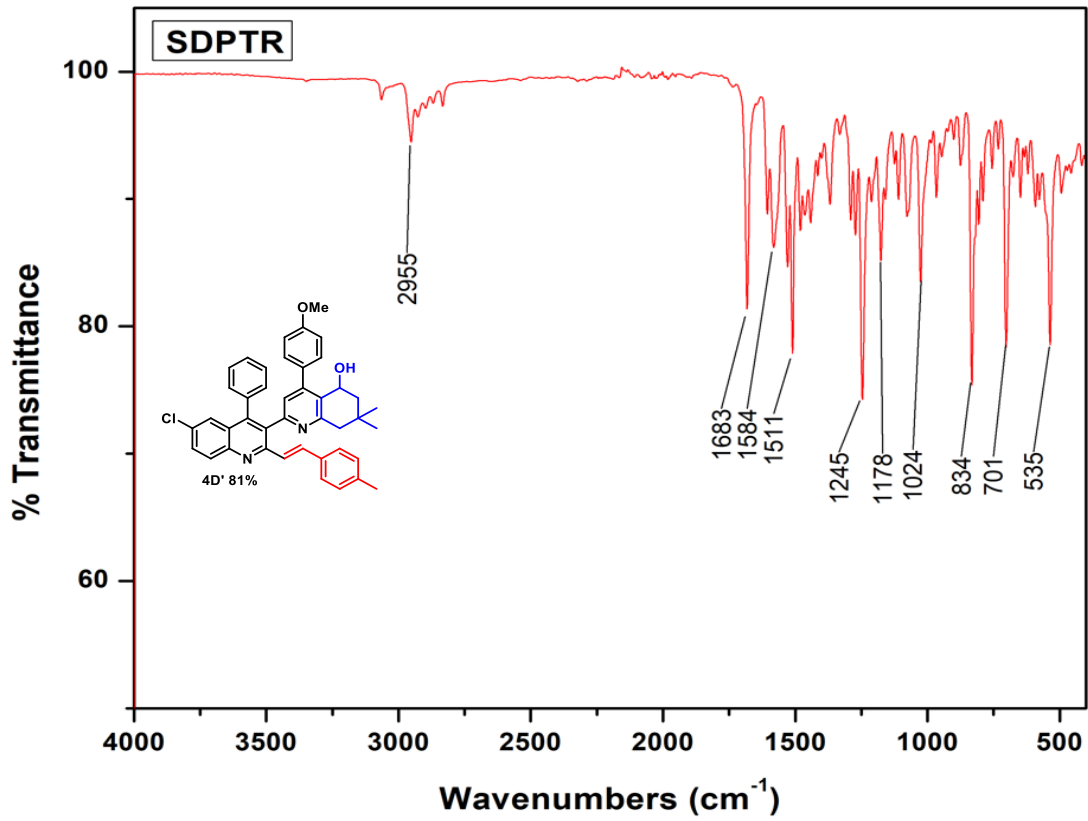

### 4D' HRMS (ESI)

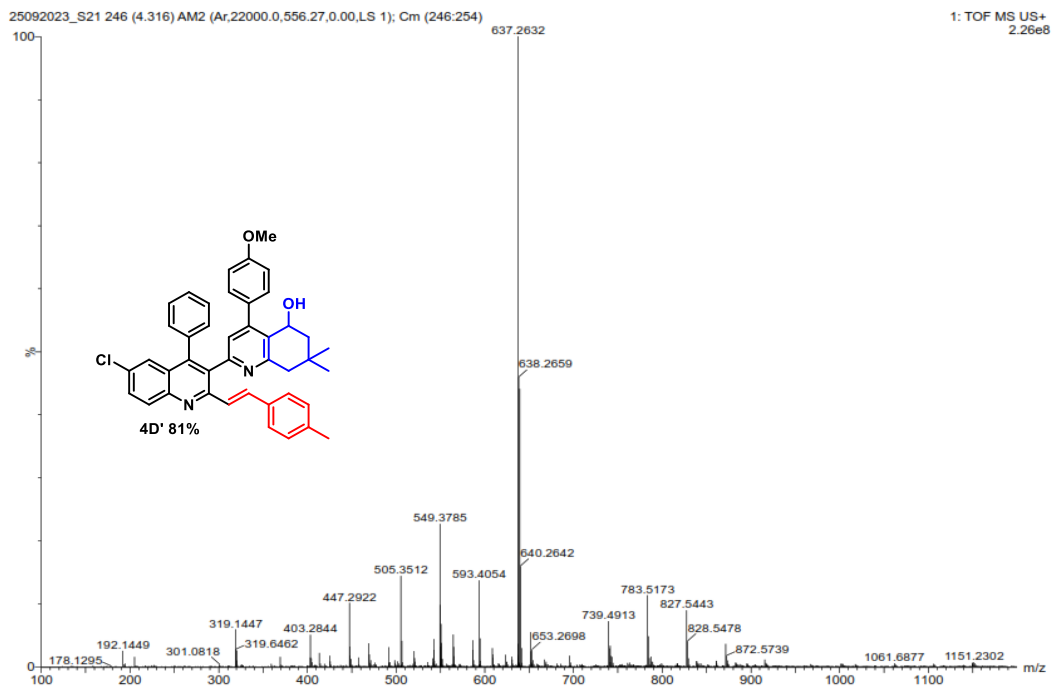

4E <sup>1</sup>H NMR (400 MHz, CDCl<sub>3</sub>)

Signature SIF VIT VELLORE  
SCDM4020ET

8.248  
8.209  
8.131  
8.112  
7.596  
7.573  
7.444  
7.365  
7.346  
7.256  
7.243  
7.220  
7.184  
7.152  
7.133  
7.081  
6.837  
6.817  
6.777  
6.758

3.990  
3.973  
3.956  
3.939  
3.735

2.962  
2.442

1.230  
1.213  
1.195  
1.008

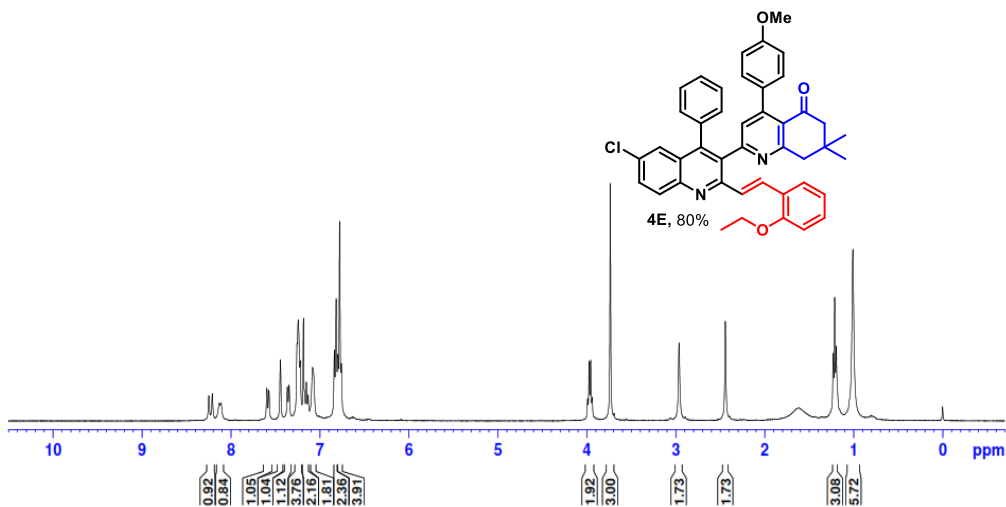

4E <sup>13</sup>C NMR (101 MHz, CDCl<sub>3</sub>)

Signature SIF VIT VELLORE  
SCDM4020ET

197.9

162.8  
157.5  
157.5  
153.9  
150.9  
135.7  
132.5  
131.5  
130.9  
130.9  
130.1  
129.3  
129.3  
128.1  
127.0  
127.0  
125.8  
125.2  
125.2  
120.5  
113.4  
112.0

63.8

55.3

51.9

47.6

32.6

14.7

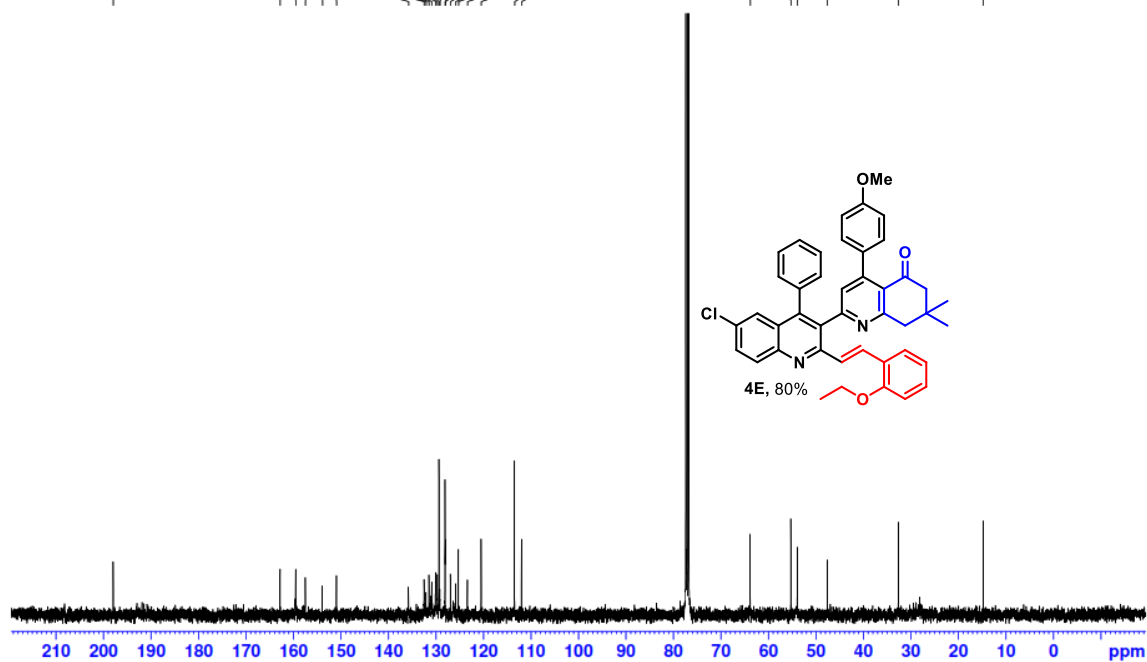

### 4E FTIR

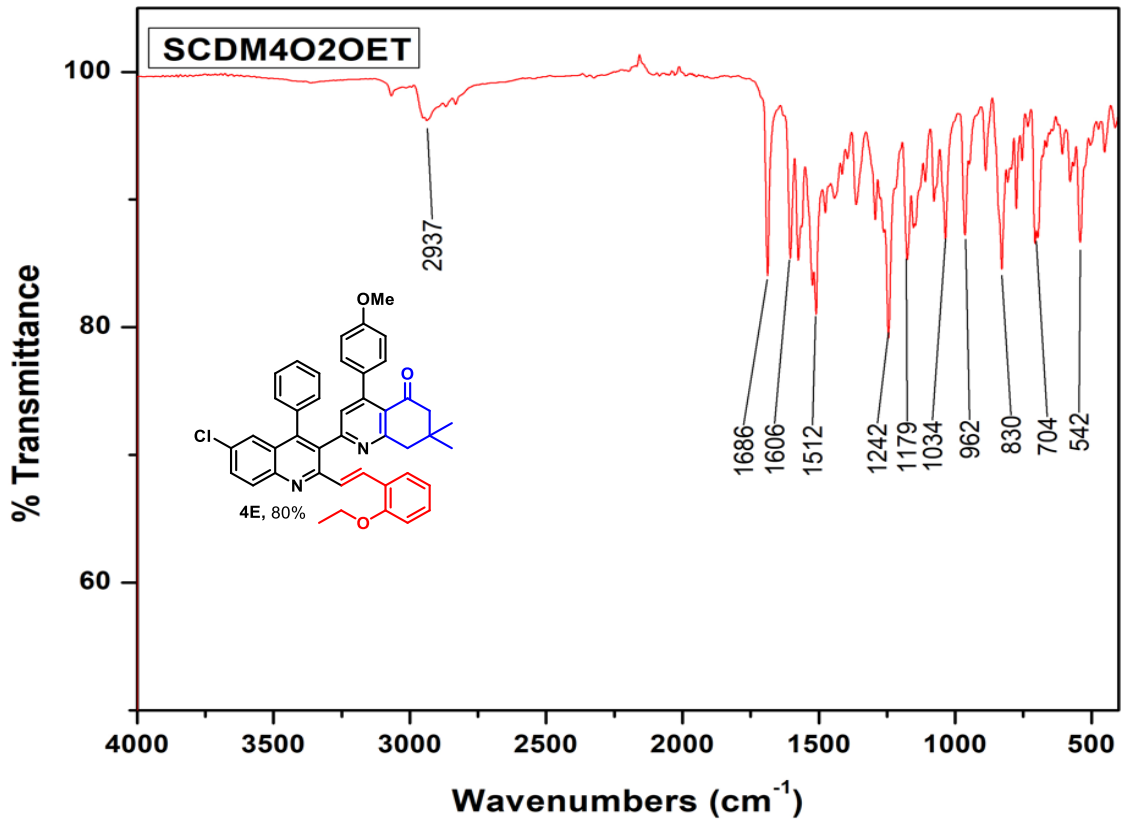

### 4E HRMS (ESI)

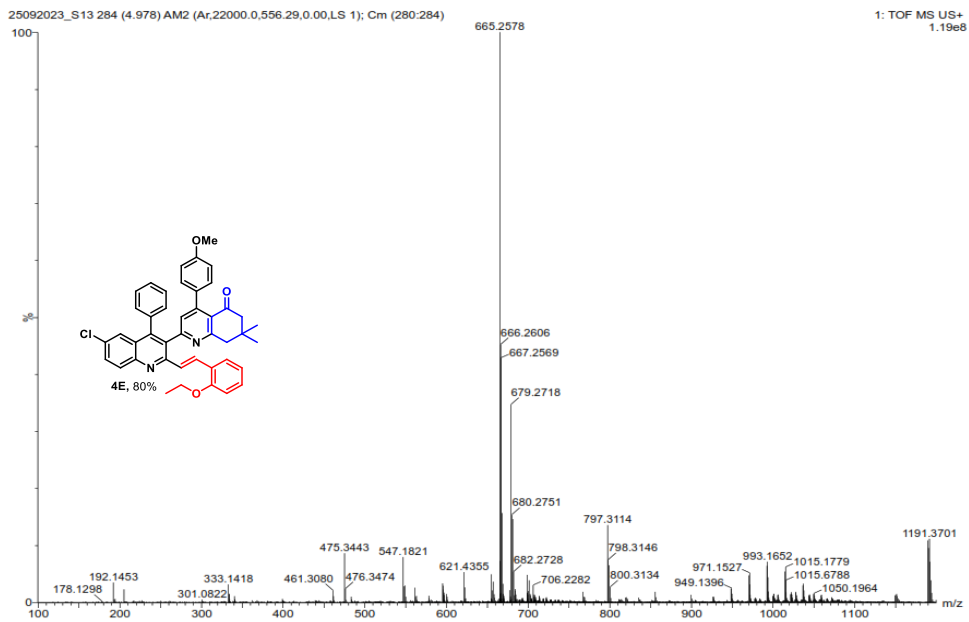

4F <sup>1</sup>H NMR (400 MHz, CDCl<sub>3</sub>)

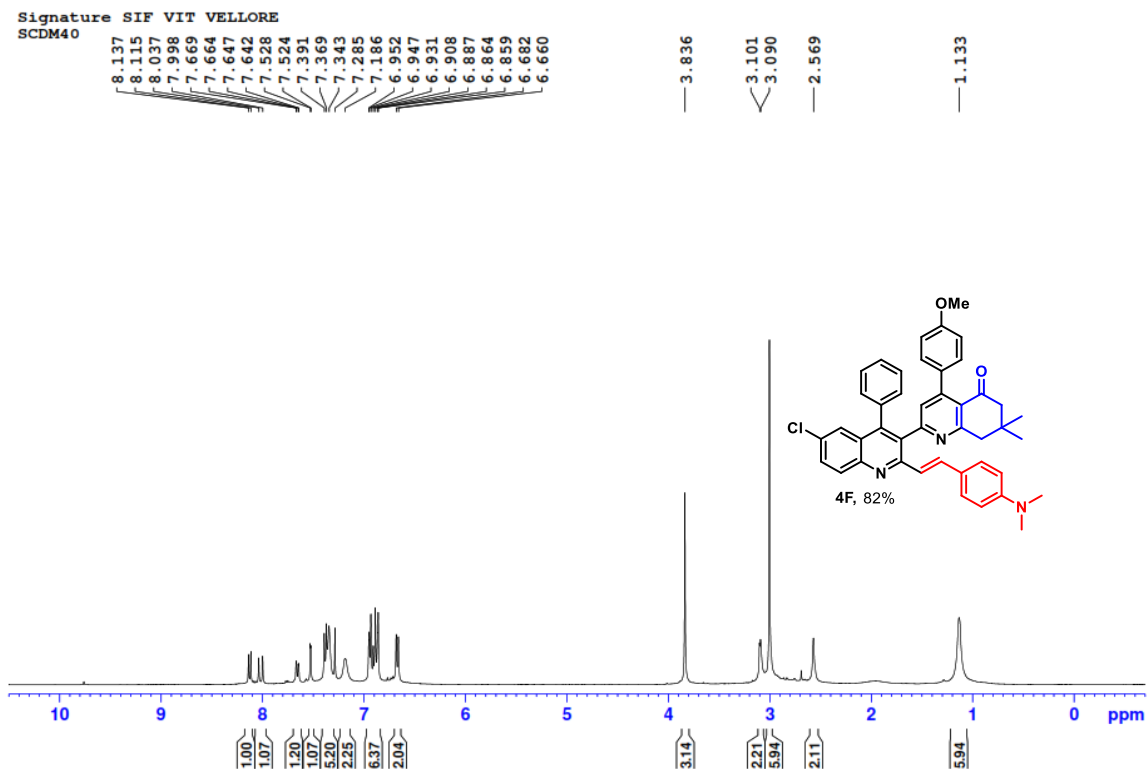

4F <sup>13</sup>C NMR (101 MHz, CDCl<sub>3</sub>)

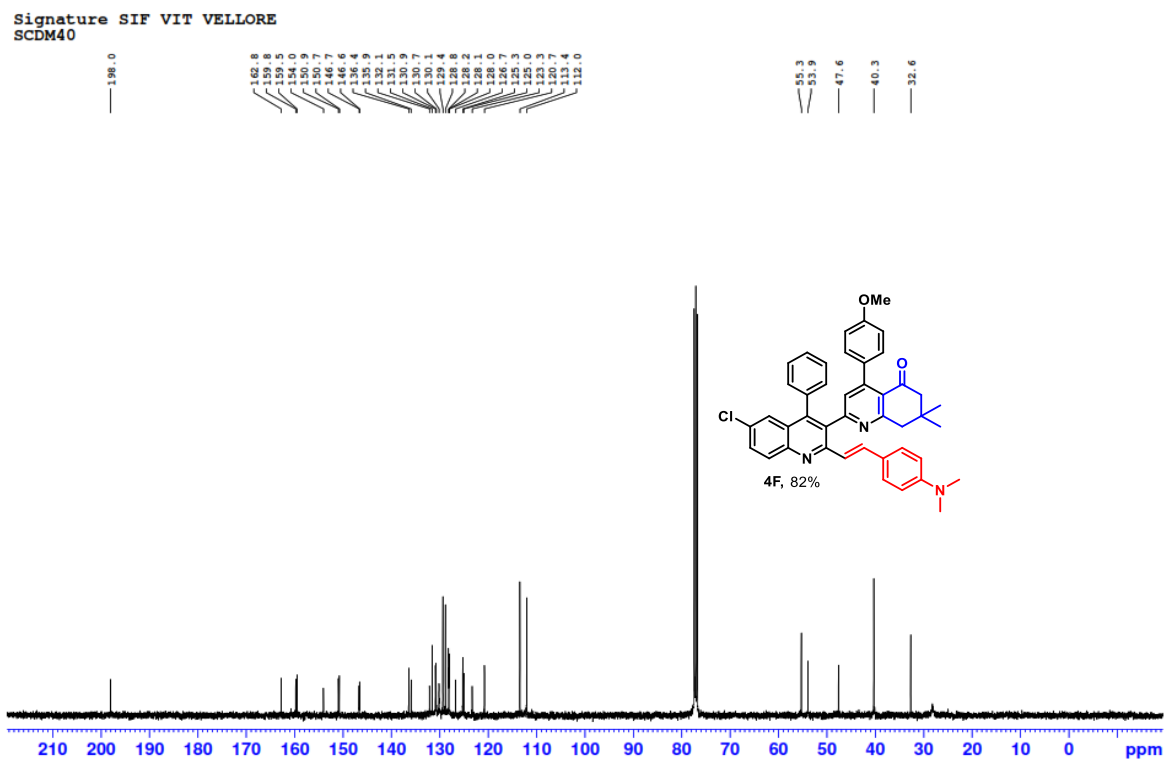

#### 4F FTIR

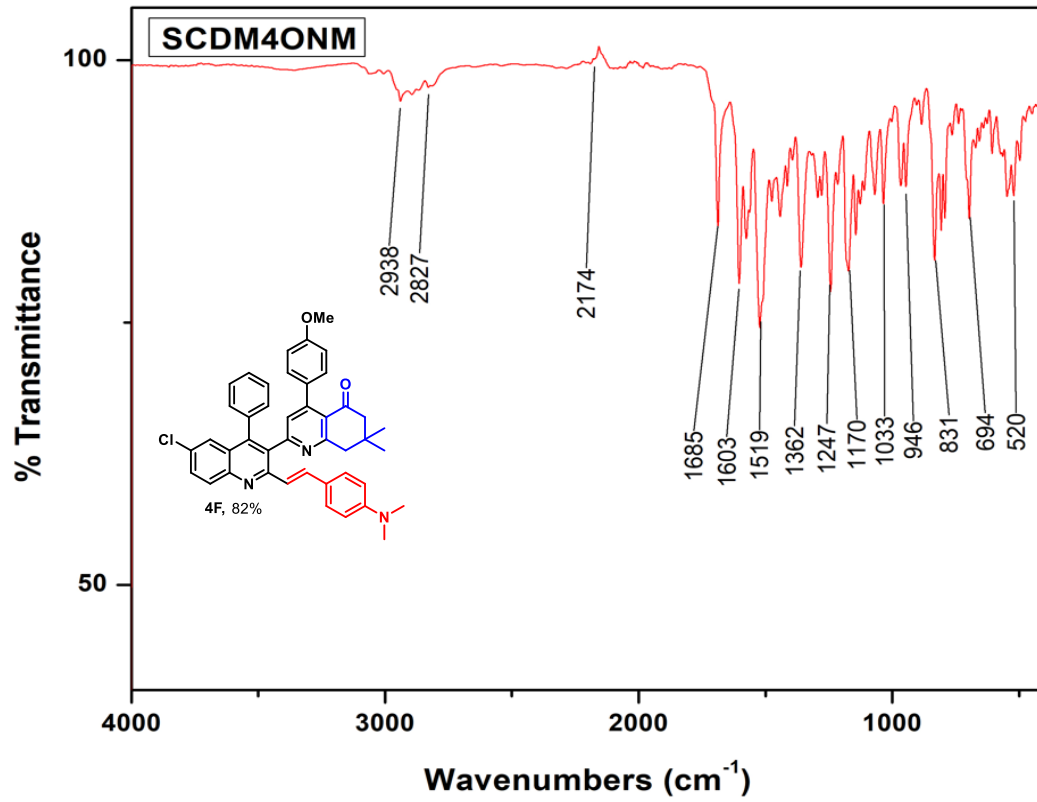

#### 4F HRMS (ESI)

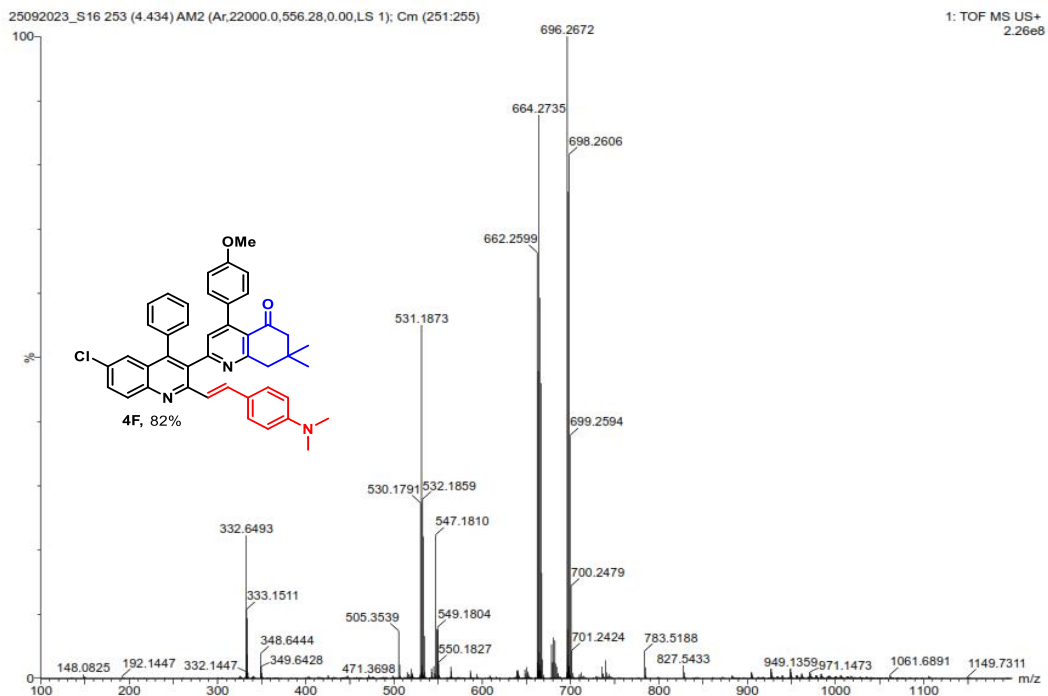



4G <sup>1</sup>H NMR (400 MHz, CDCl<sub>3</sub>)

Signature SIF VIT VELLORE  
SCDM4OFH

8.099  
8.077  
7.885  
7.846  
7.655  
7.634  
7.519  
7.355  
7.326  
7.155  
7.018  
6.980  
6.924  
6.904  
6.861  
6.840  
6.815  
6.501  
6.426

3.813  
3.053  
2.539  
1.100

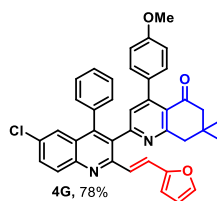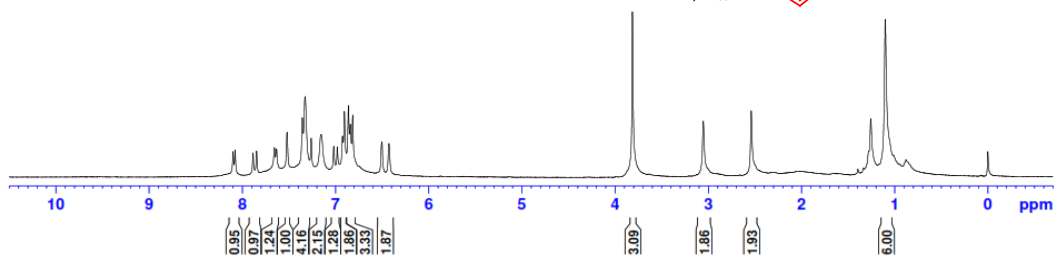

4G <sup>13</sup>C NMR (101 MHz, CDCl<sub>3</sub>)

Signature SIF VIT VELLORE  
SCDM4OFH

198.1  
162.9  
159.5  
159.2  
153.1  
153.0  
146.9  
146.4  
143.1  
135.8  
132.3  
132.1  
131.5  
131.0  
130.9  
130.1  
128.1  
127.0  
125.3  
123.4  
123.0  
113.4  
112.0

55.3  
53.9  
47.5  
32.6

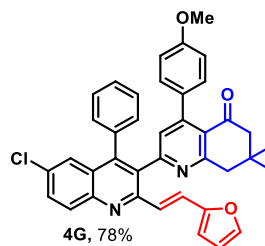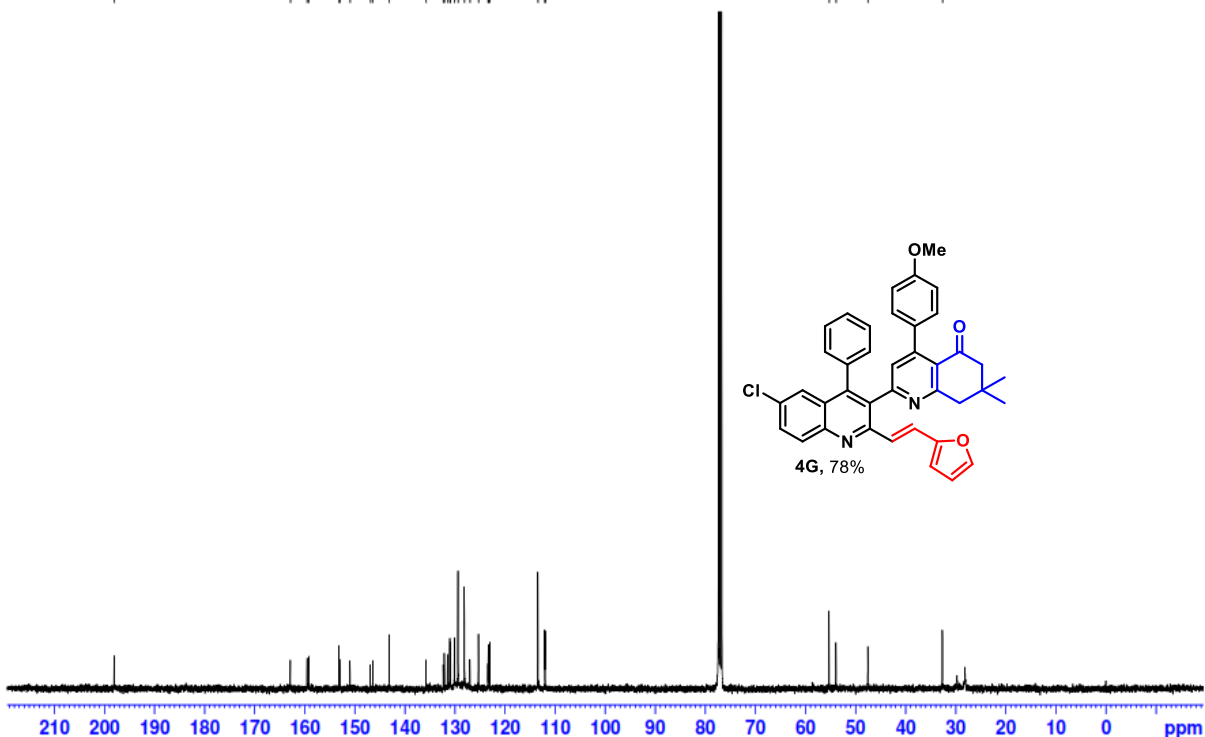

### 4G FTIR

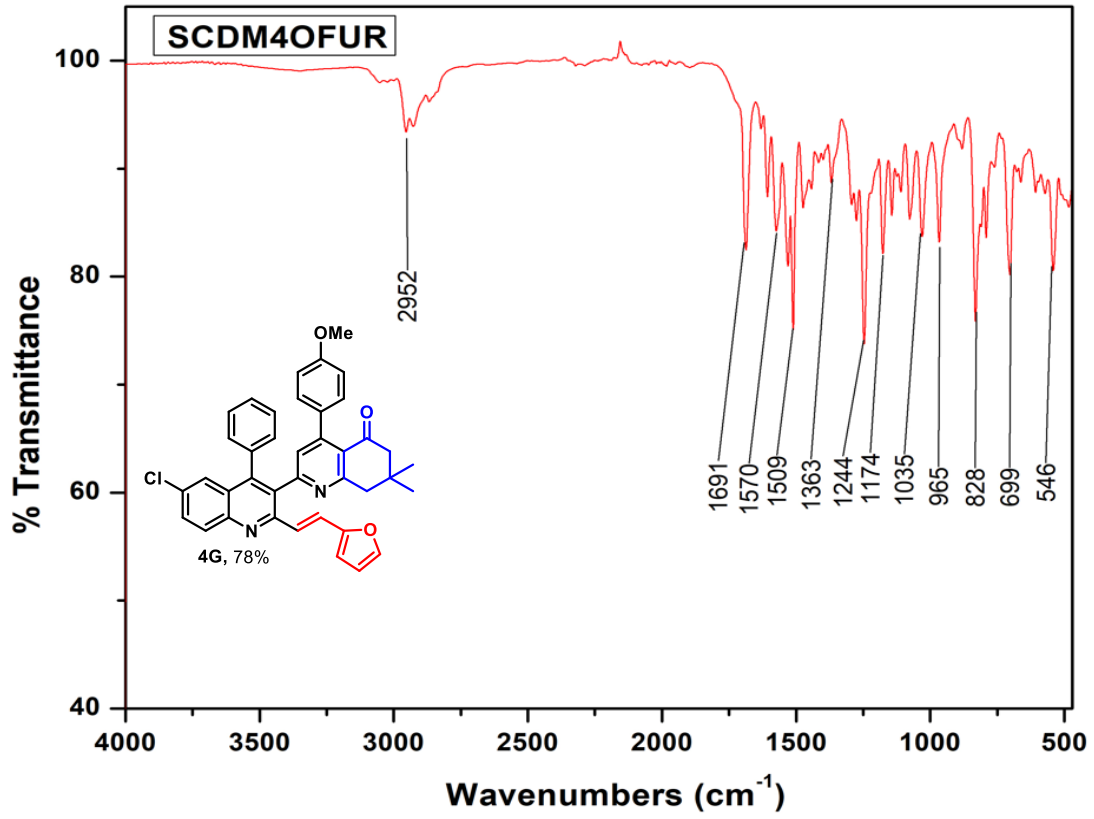

### 4G HRMS (ESI)

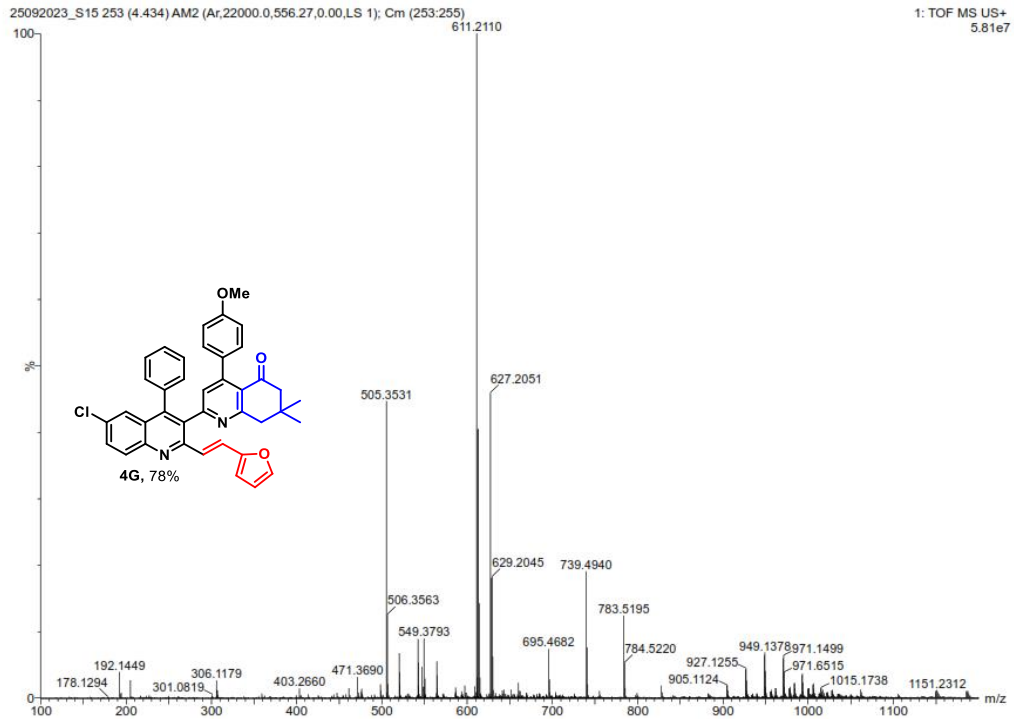

4H <sup>1</sup>H NMR (400 MHz, CDCl<sub>3</sub>)

Signature SIF VIT VELLORE  
SC404CL2

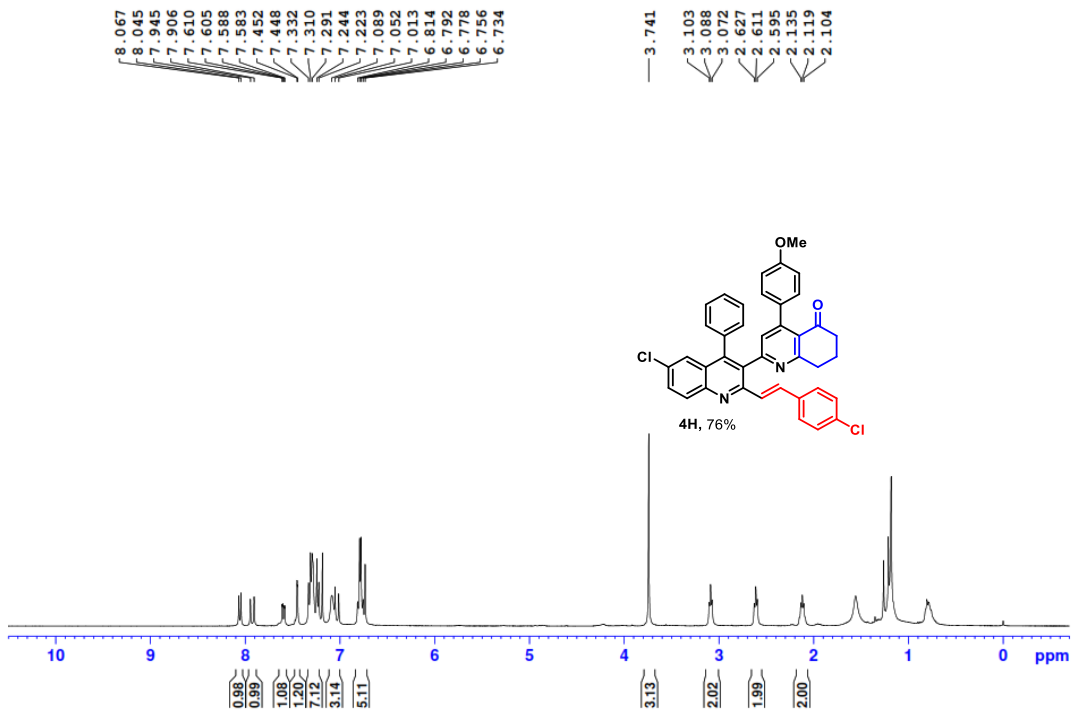

4H <sup>13</sup>C NMR (101 MHz, CDCl<sub>3</sub>)

Signature SIF VIT VELLORE  
SC404CL

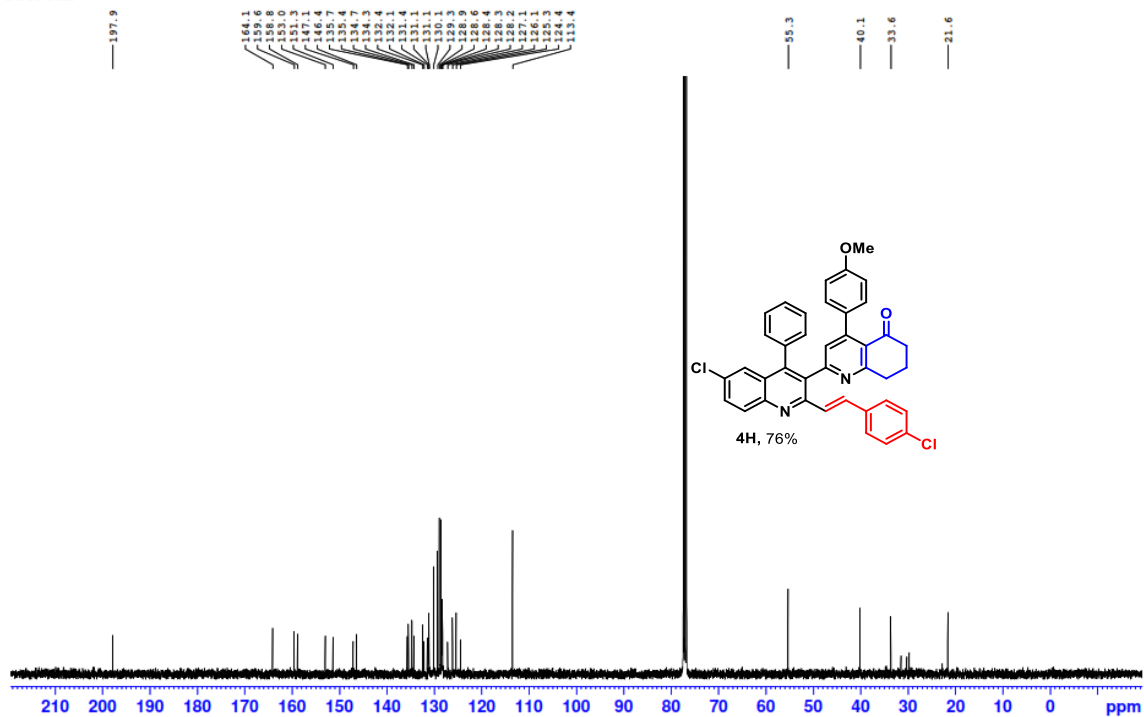

#### 4H FTIR

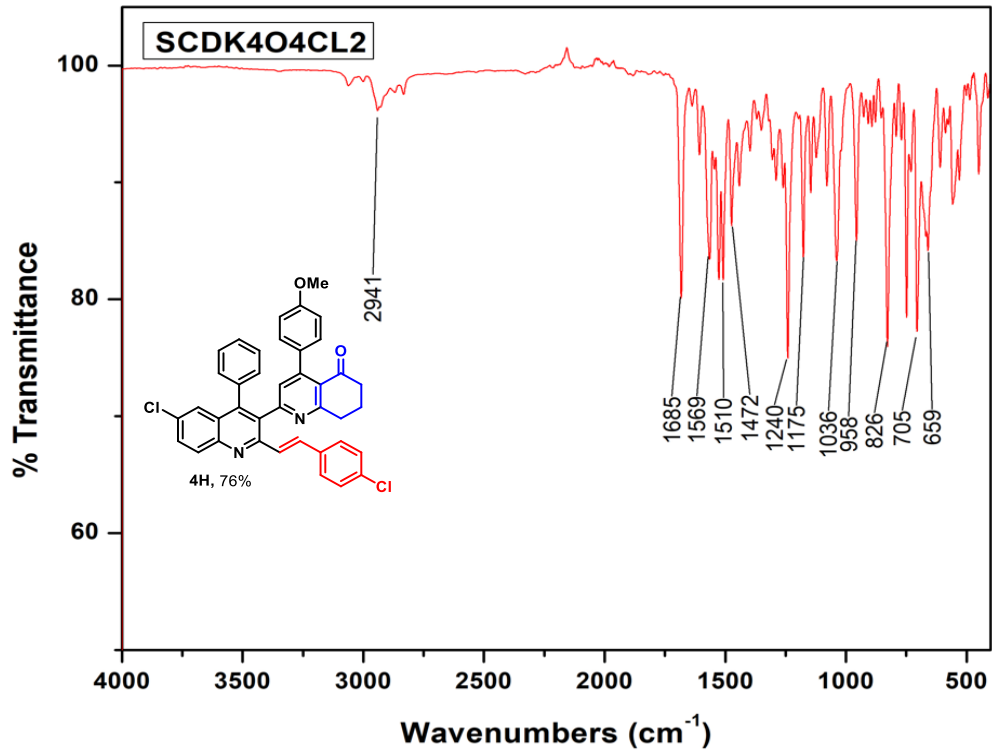

#### 4H HRMS (ESI)

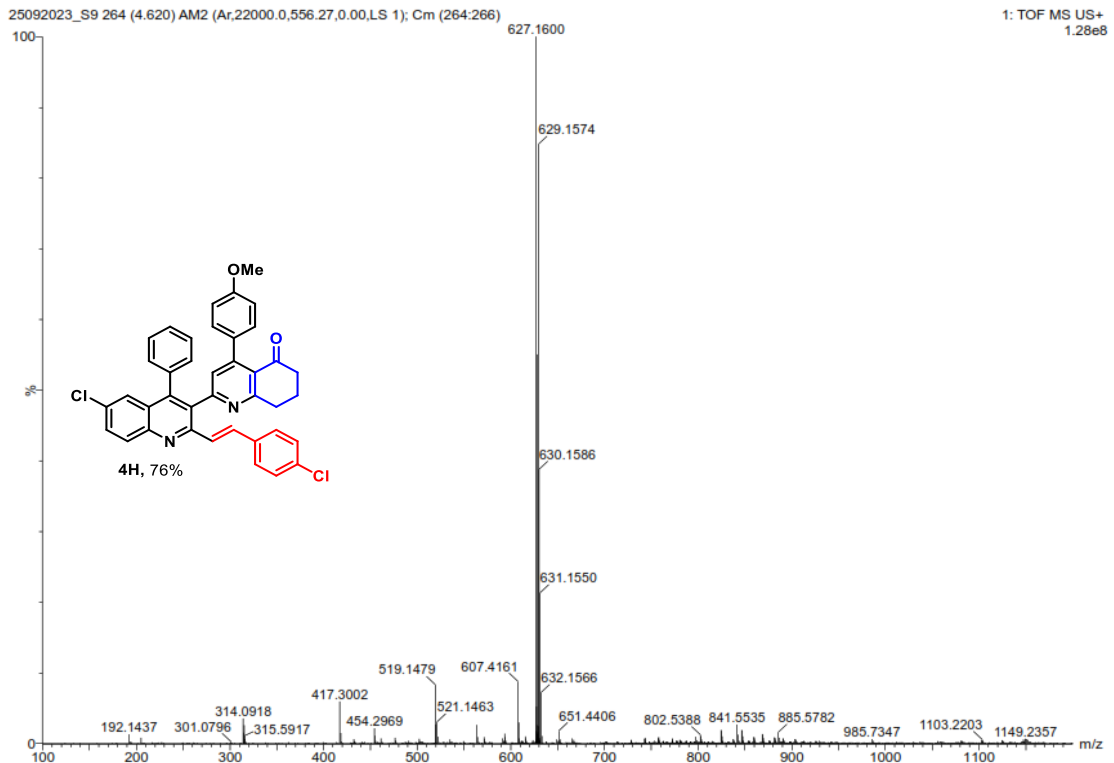

**4I** <sup>1</sup>H NMR (400 MHz, CDCl<sub>3</sub>)

Signature SIF VIT VELLORE  
SCPT4F2

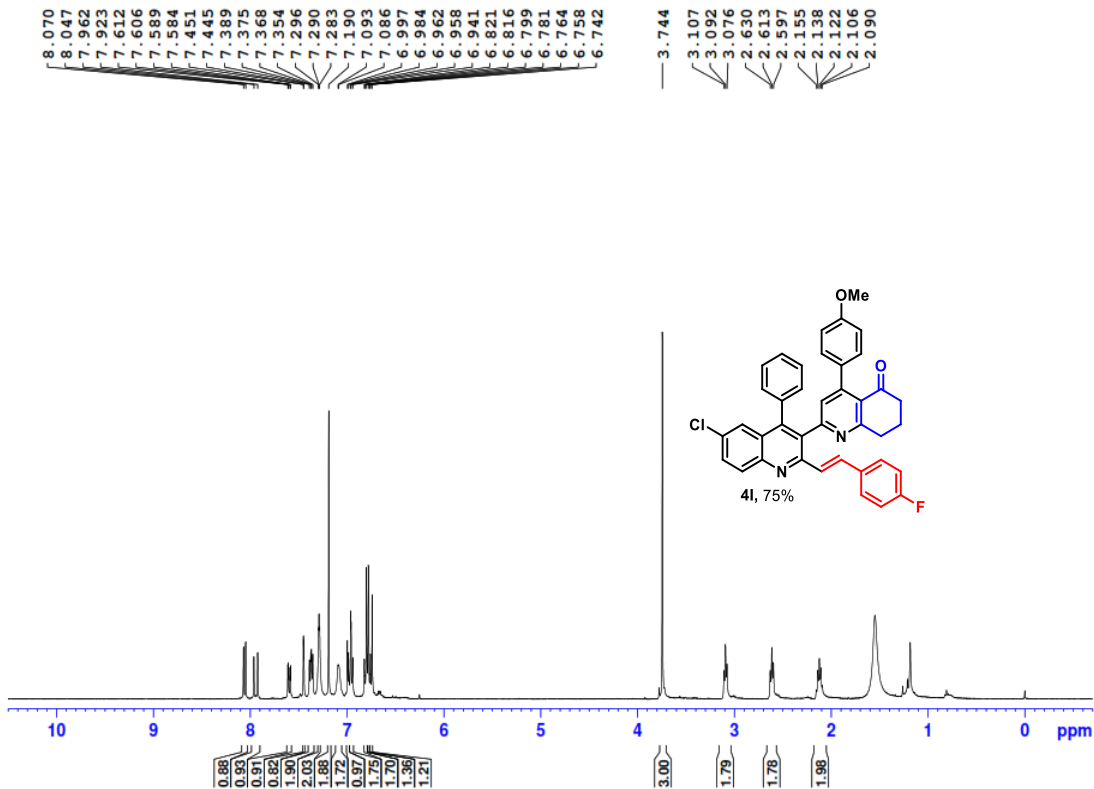

**4I** <sup>13</sup>C NMR (101 MHz, CDCl<sub>3</sub>)

Signature SIF VIT VELLORE  
SC404F2

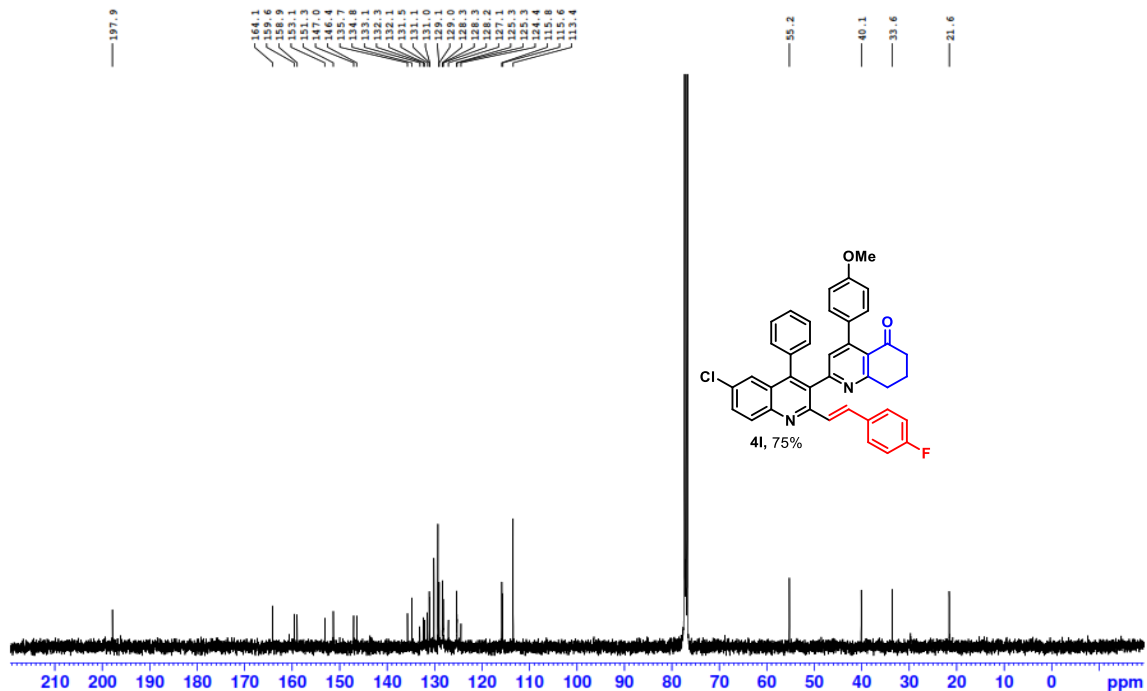

# 4I FTIR

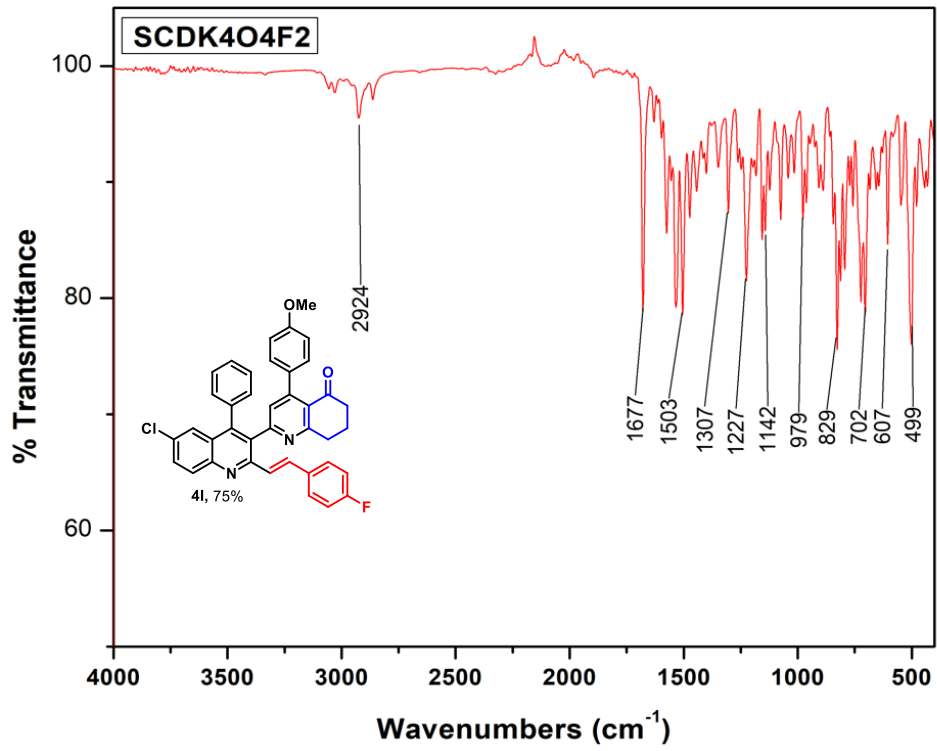

# 4I HRMS (ESI)

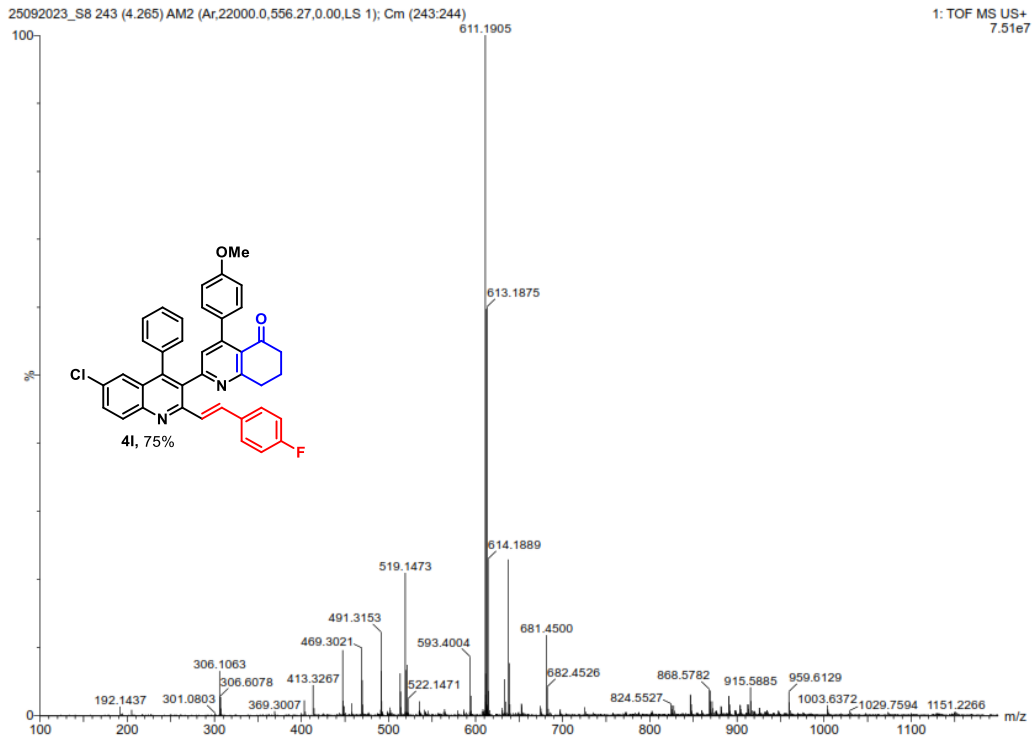

4J <sup>1</sup>H NMR (400 MHz, CDCl<sub>3</sub>)

Signature SIF VIT VELLORE  
SC402CL2

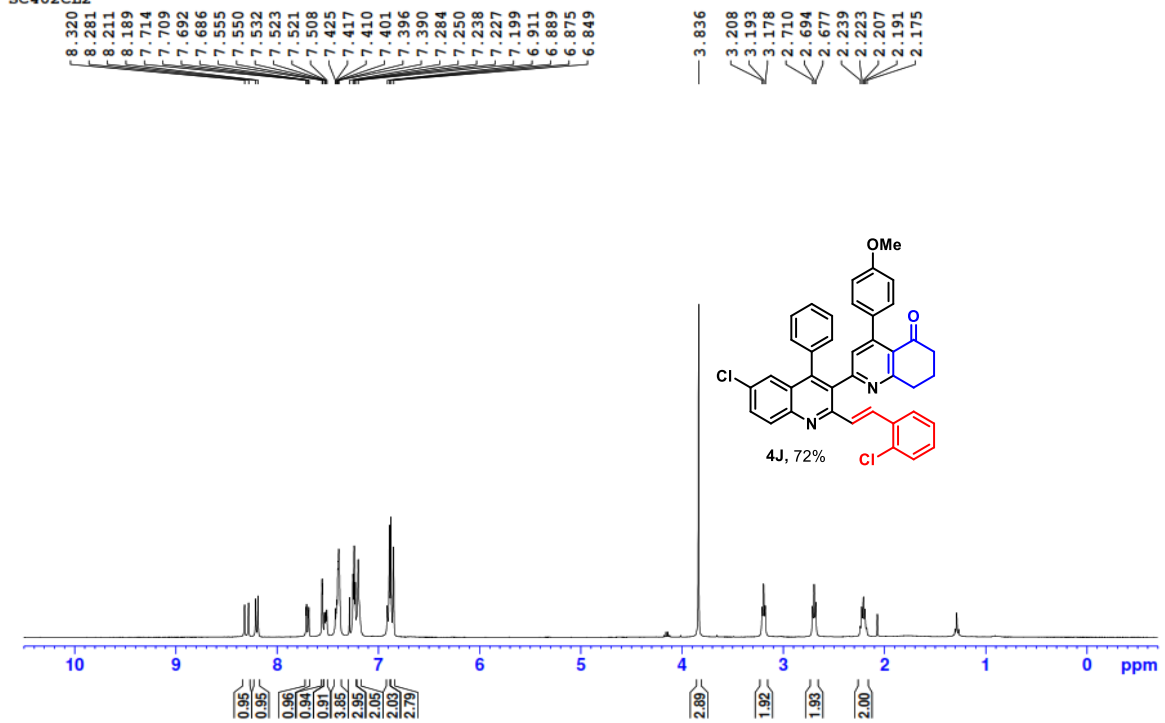

4J <sup>13</sup>C NMR (101 MHz, CDCl<sub>3</sub>)

Signature SIF VIT VELLORE  
SC402CL2

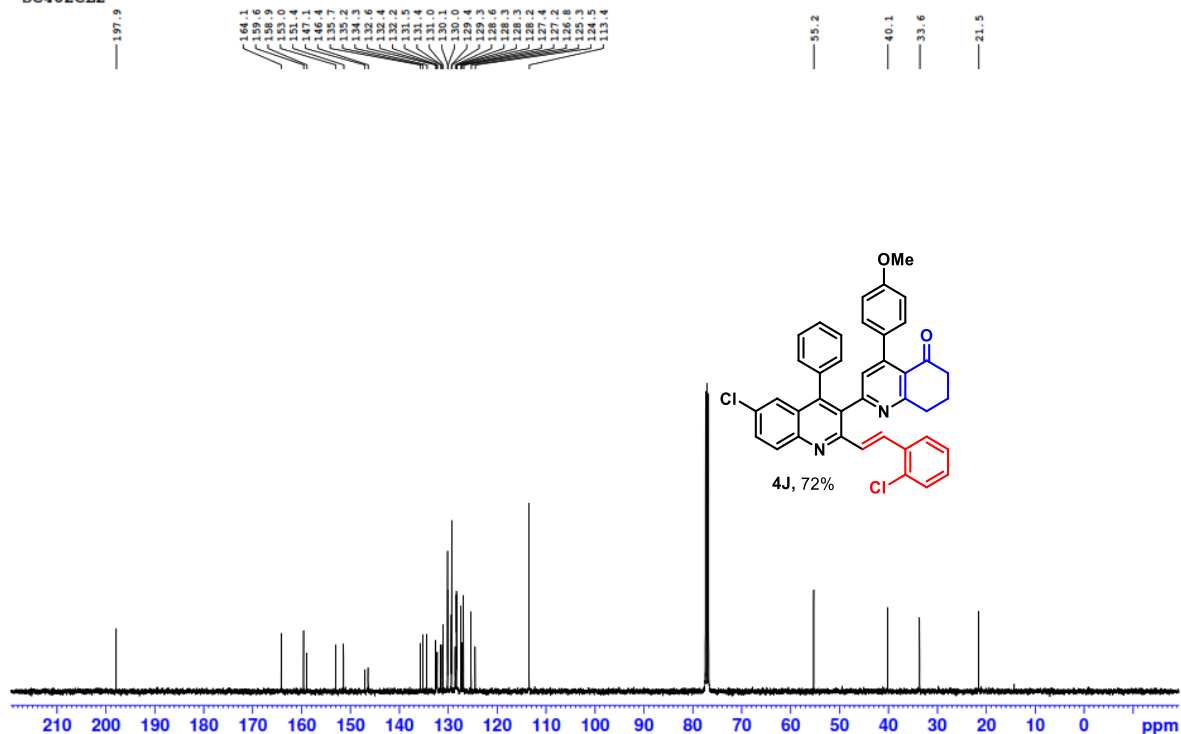

#### 4J FTIR

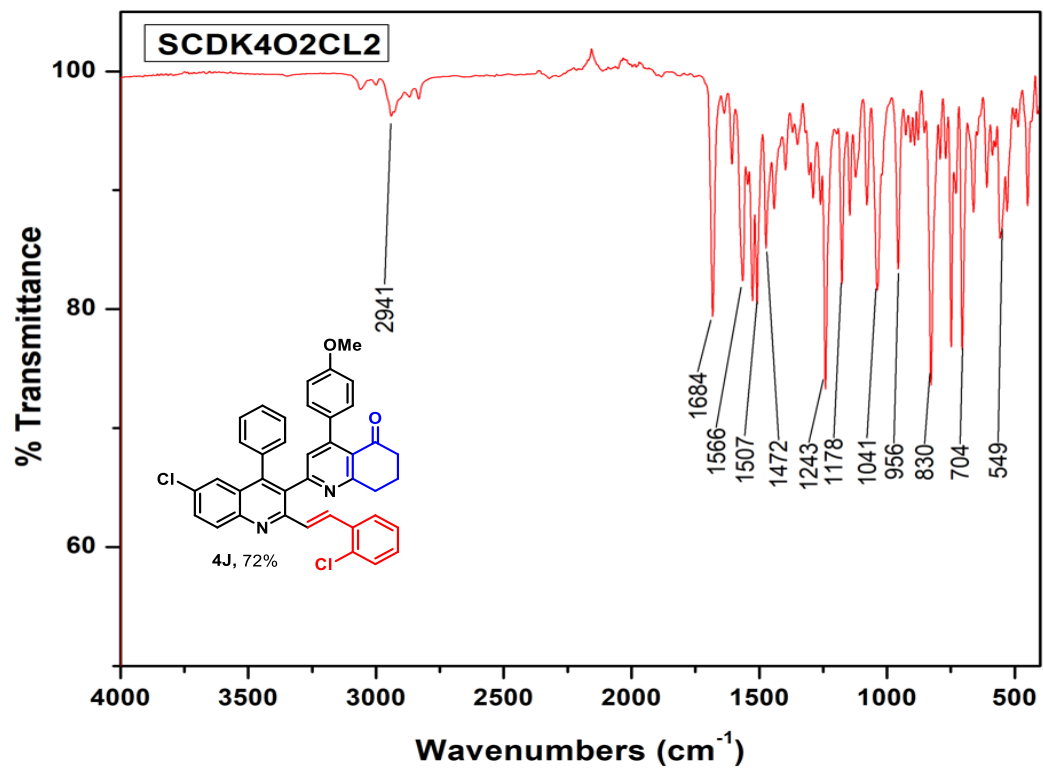

#### 4J HRMS (ESI)

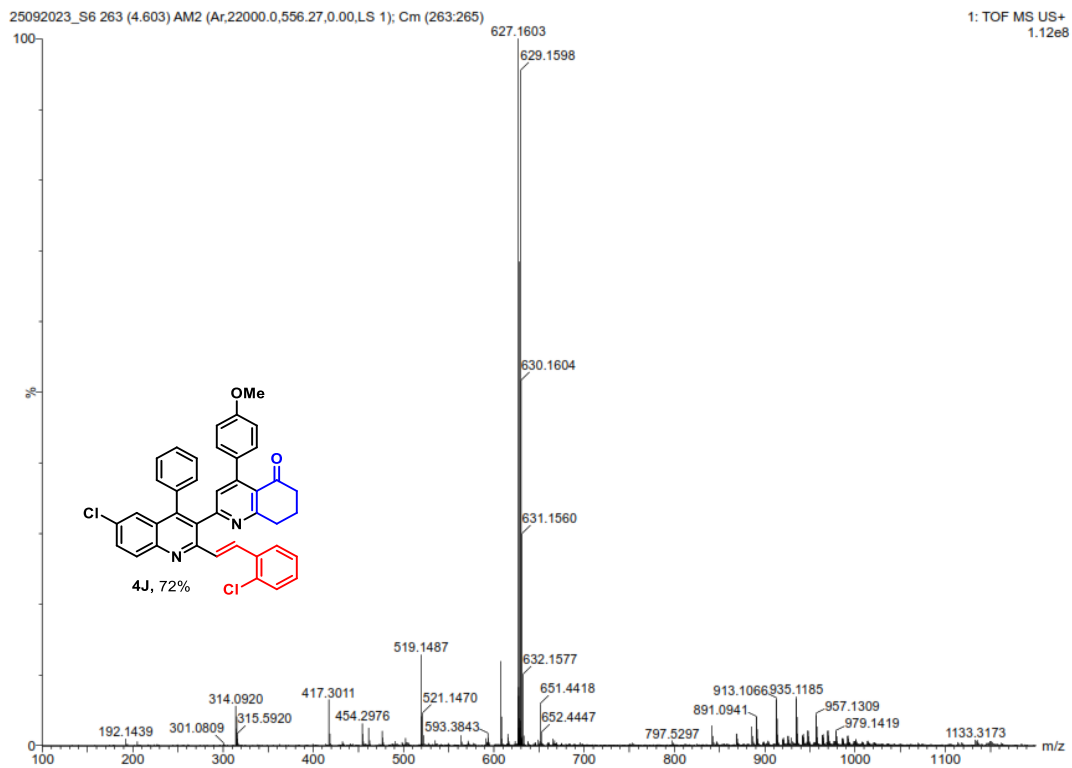



4K <sup>1</sup>H NMR (400 MHz, CDCl<sub>3</sub>)

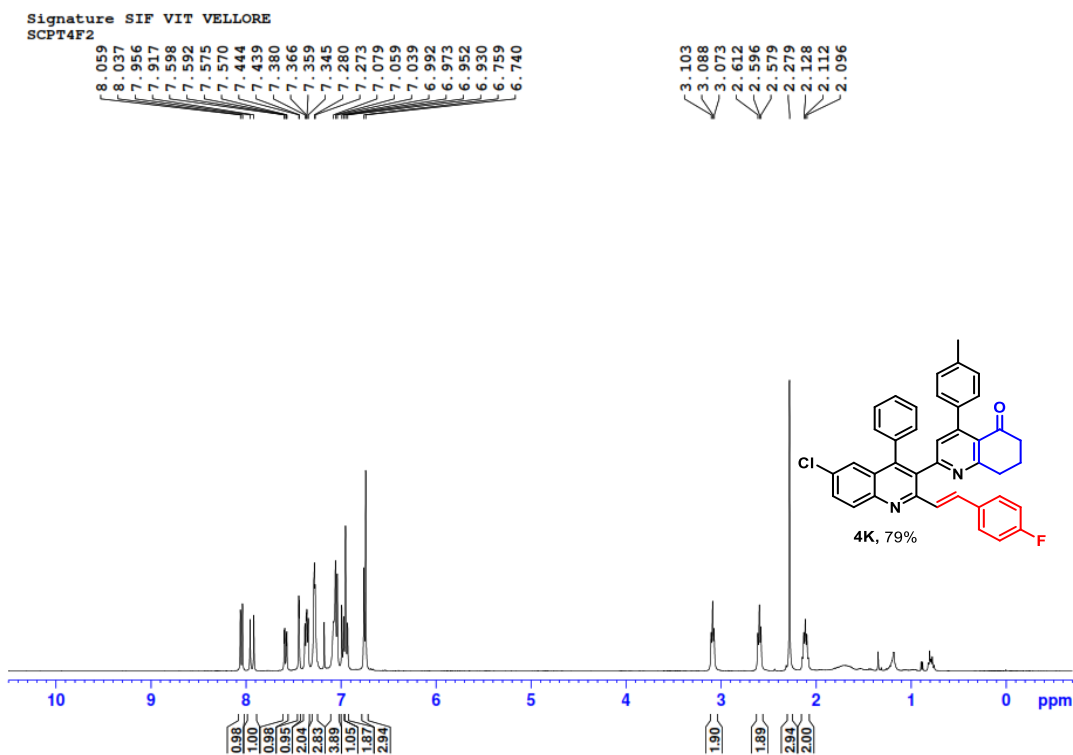

4K <sup>13</sup>C NMR (101 MHz, CDCl<sub>3</sub>)

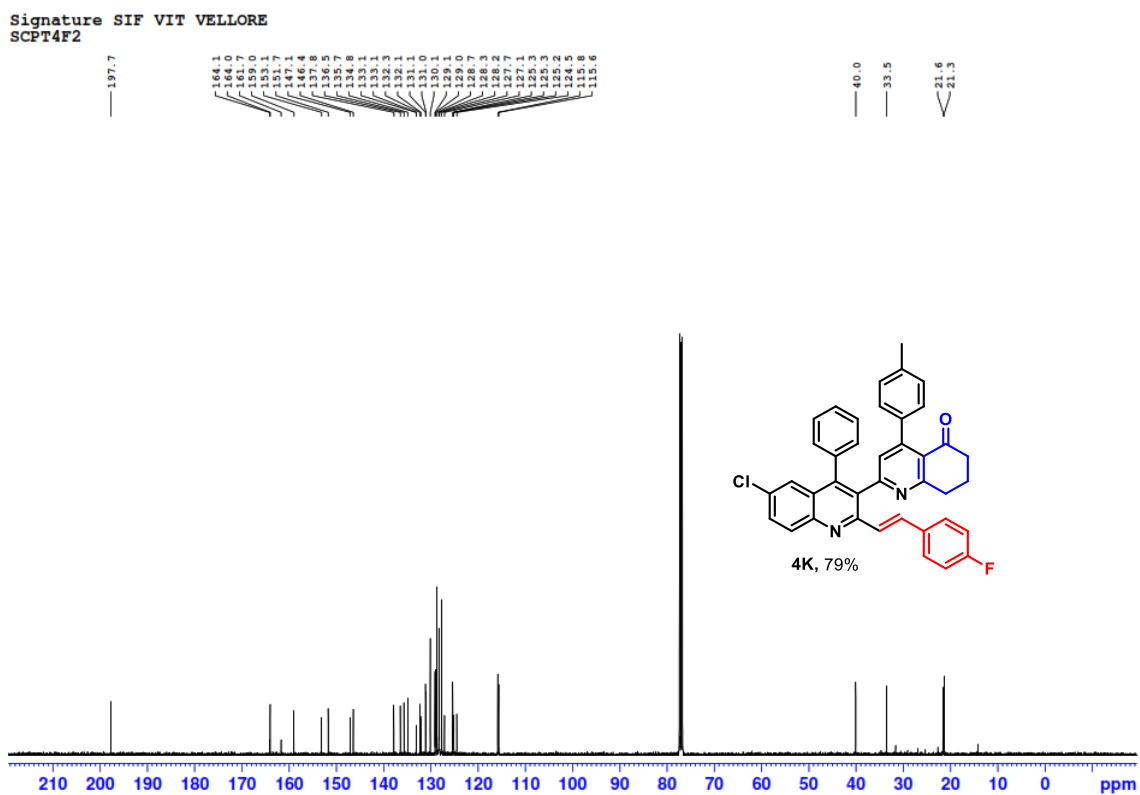

### 4K FTIR

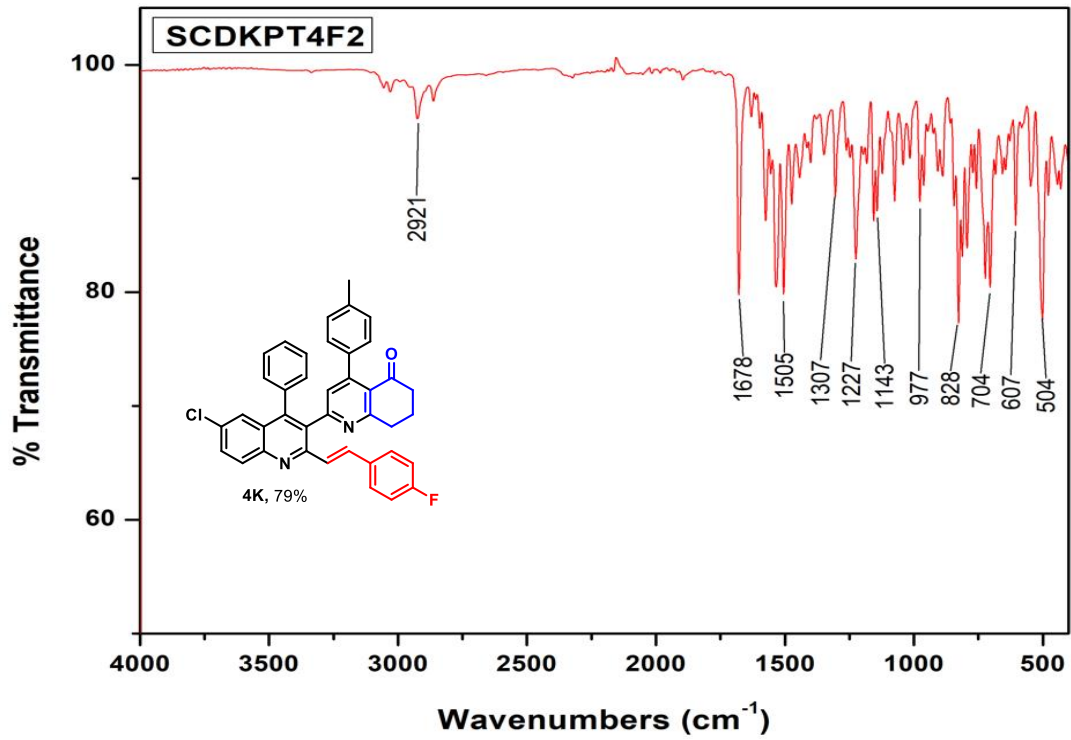

### 4K HRMS (ESI)

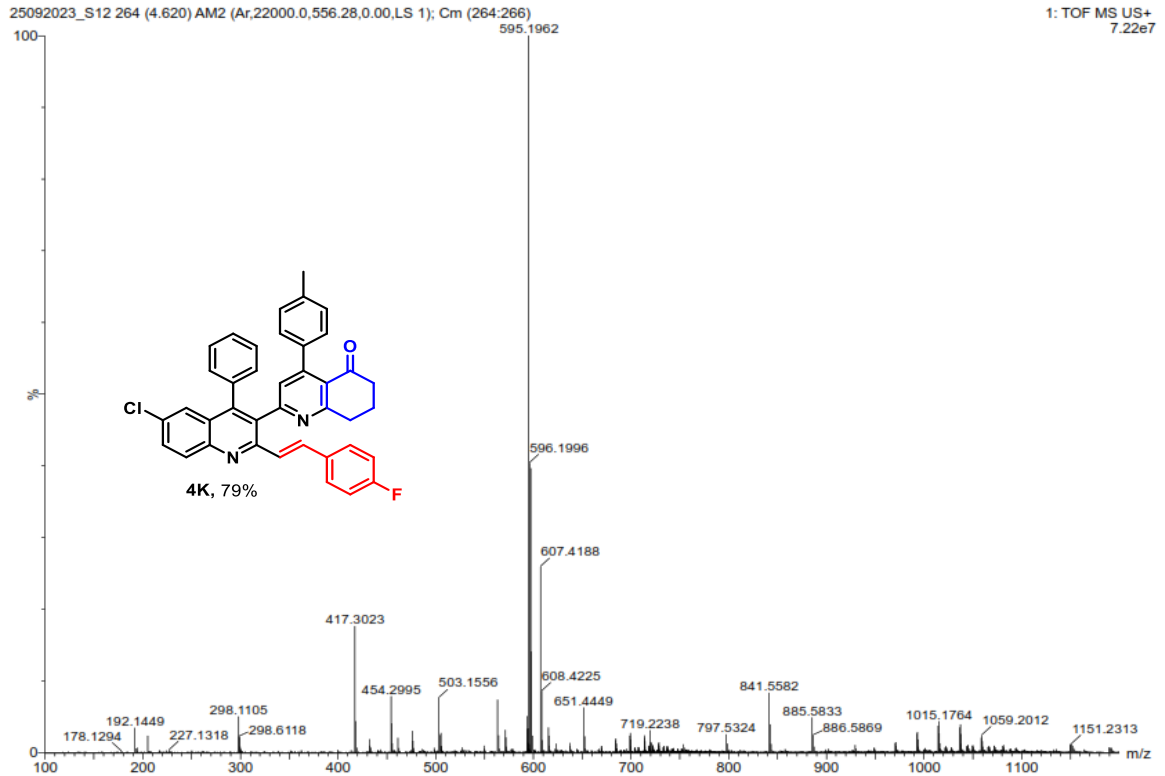

### 4L <sup>1</sup>H NMR (400 MHz, CDCl<sub>3</sub>)

Signature SIF VIT VELLORE  
SCPT2CL2

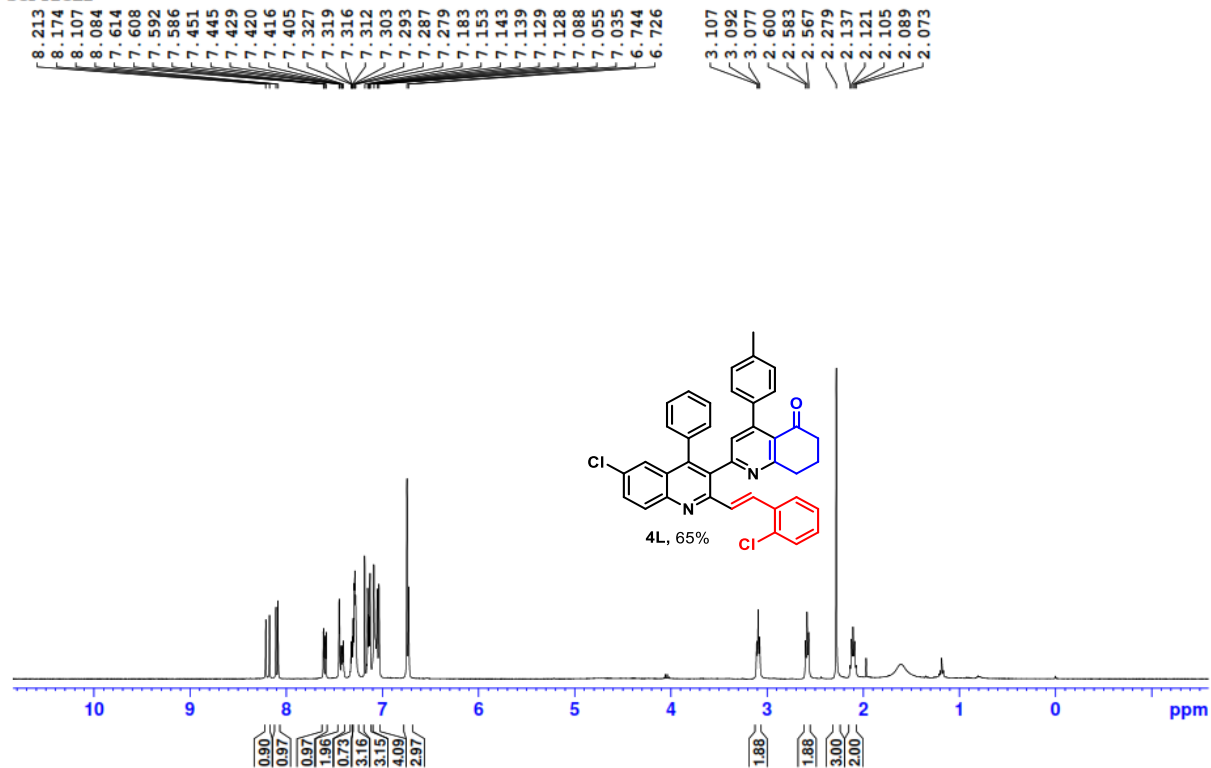

### 4L <sup>13</sup>C NMR (101 MHz, CDCl<sub>3</sub>)

Signature SIF VIT VELLORE  
SC PT 2CL2

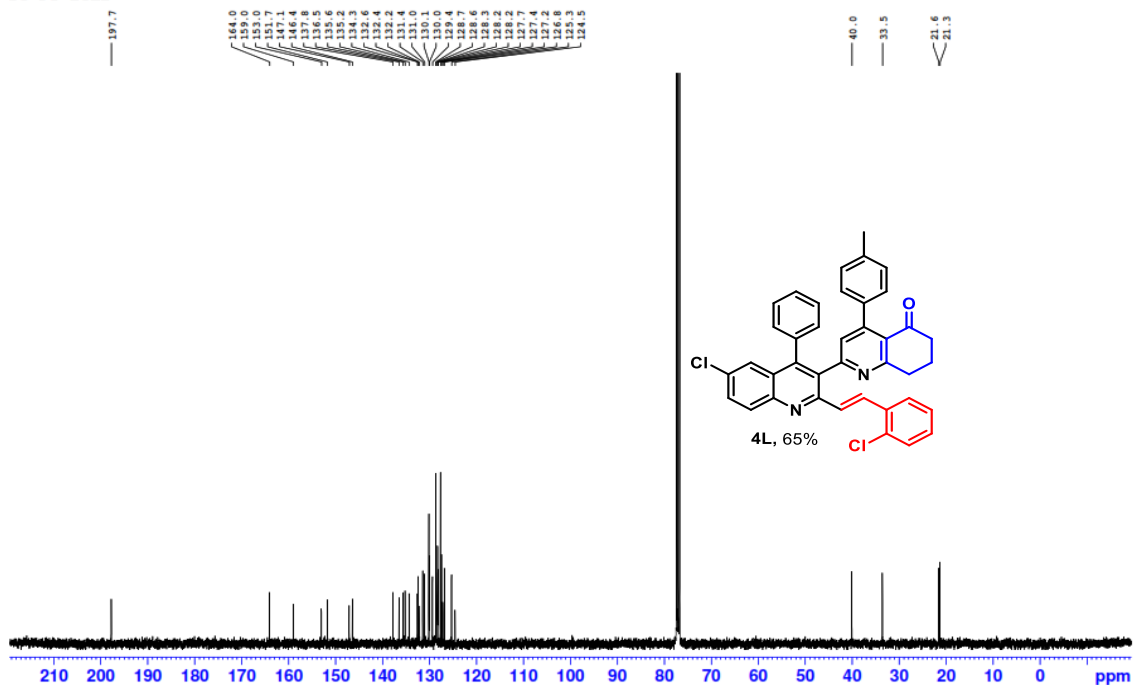

#### 4L FTIR

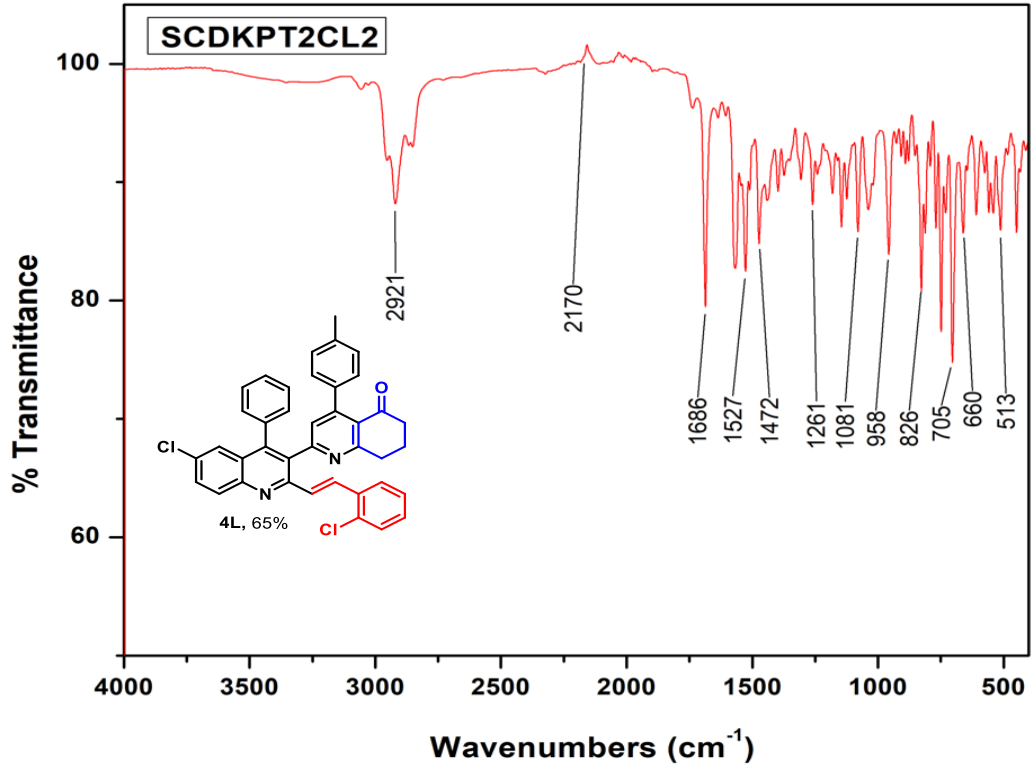

#### 4L HRMS (ESI)

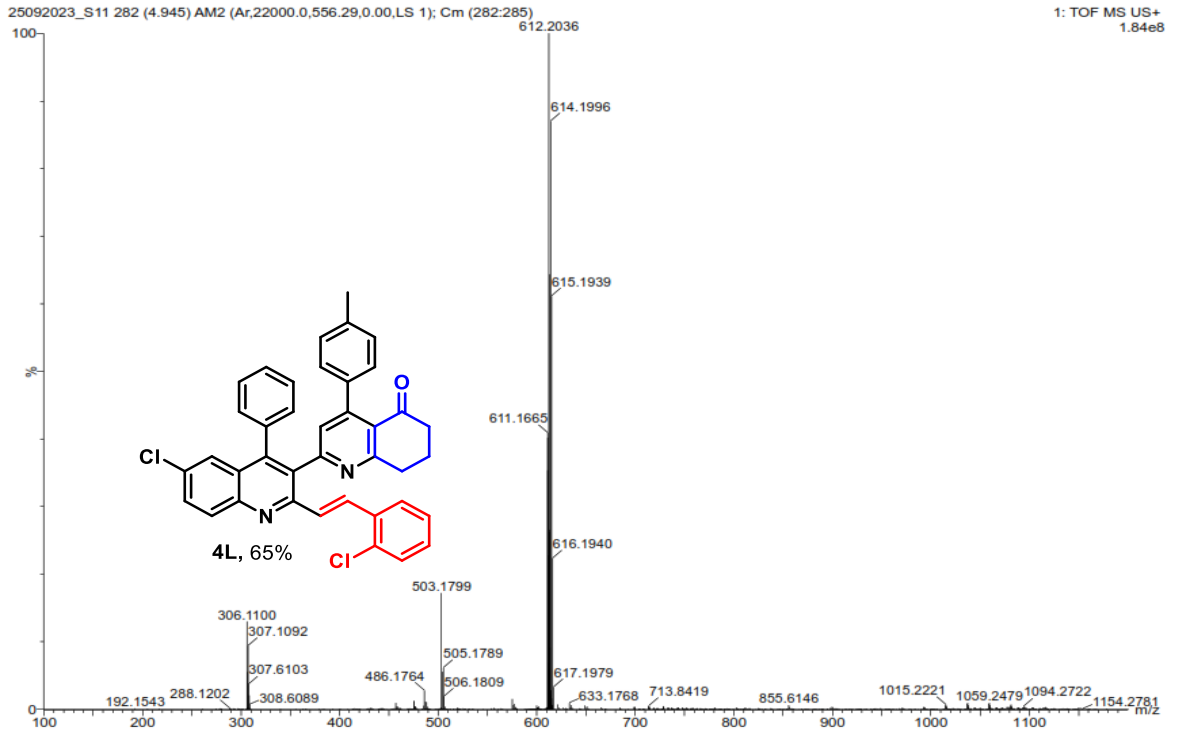

4M <sup>1</sup>H NMR (400 MHz, CDCl<sub>3</sub>)

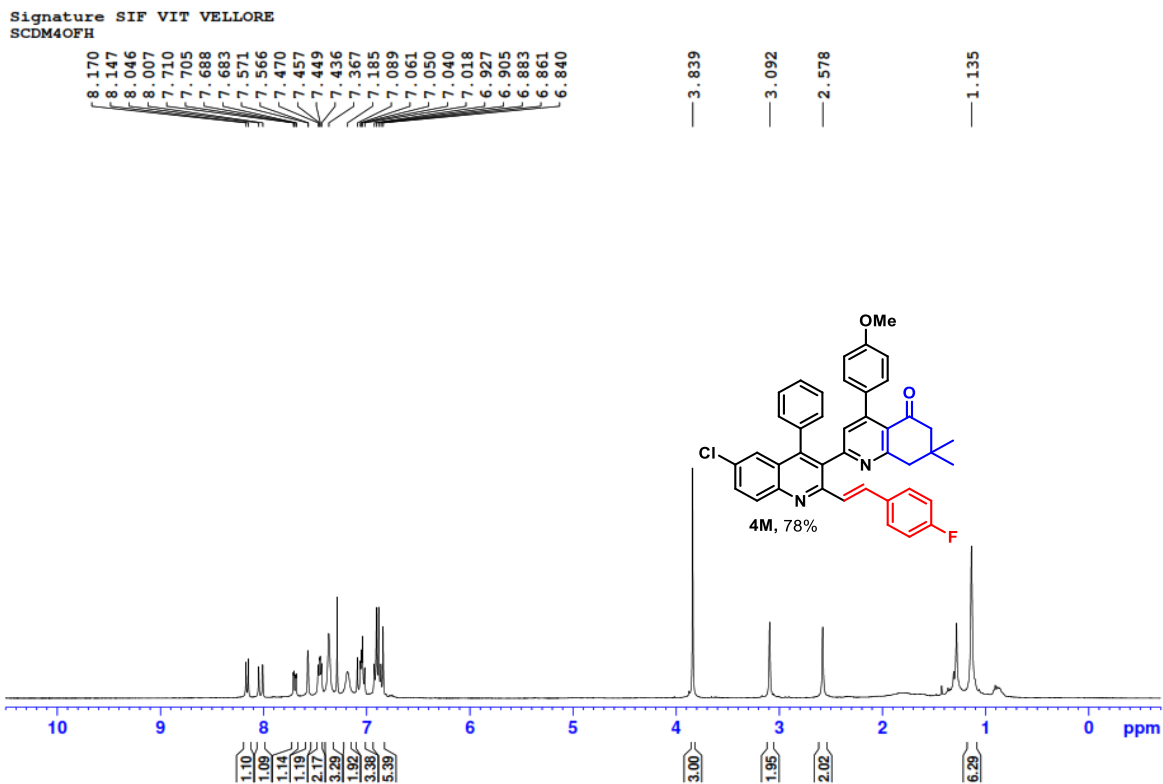

4M <sup>13</sup>C NMR (101 MHz, CDCl<sub>3</sub>)

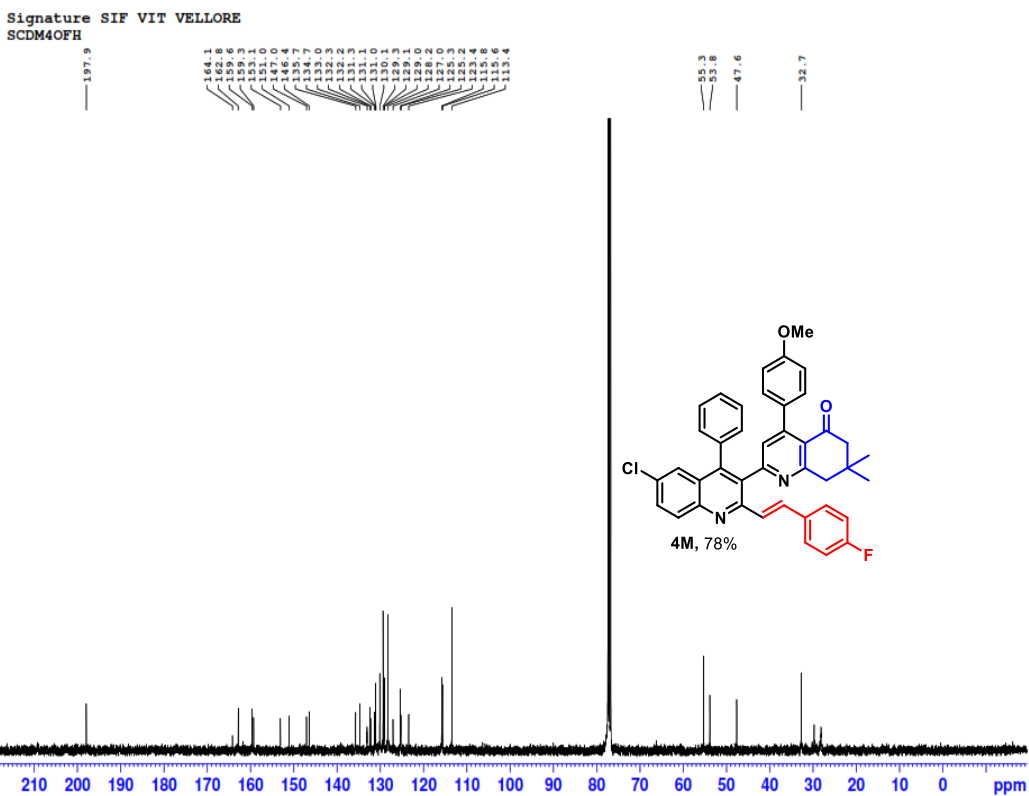

#### 4M FTIR

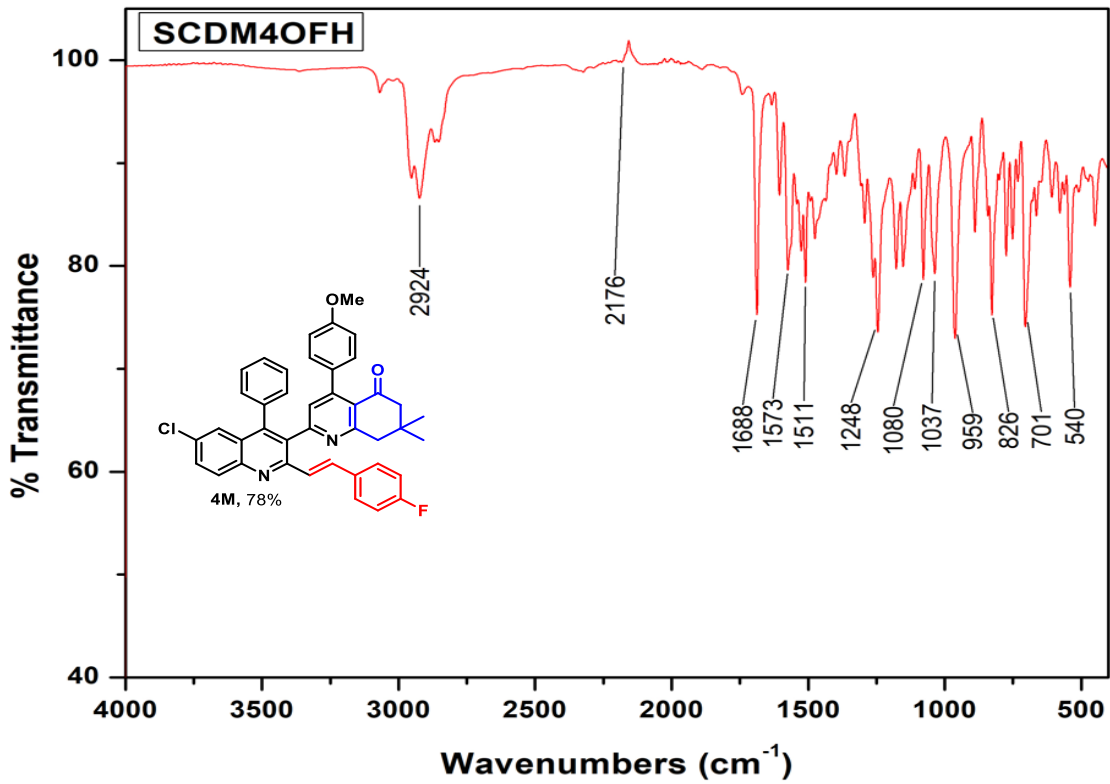

#### 4M HRMS (ESI)

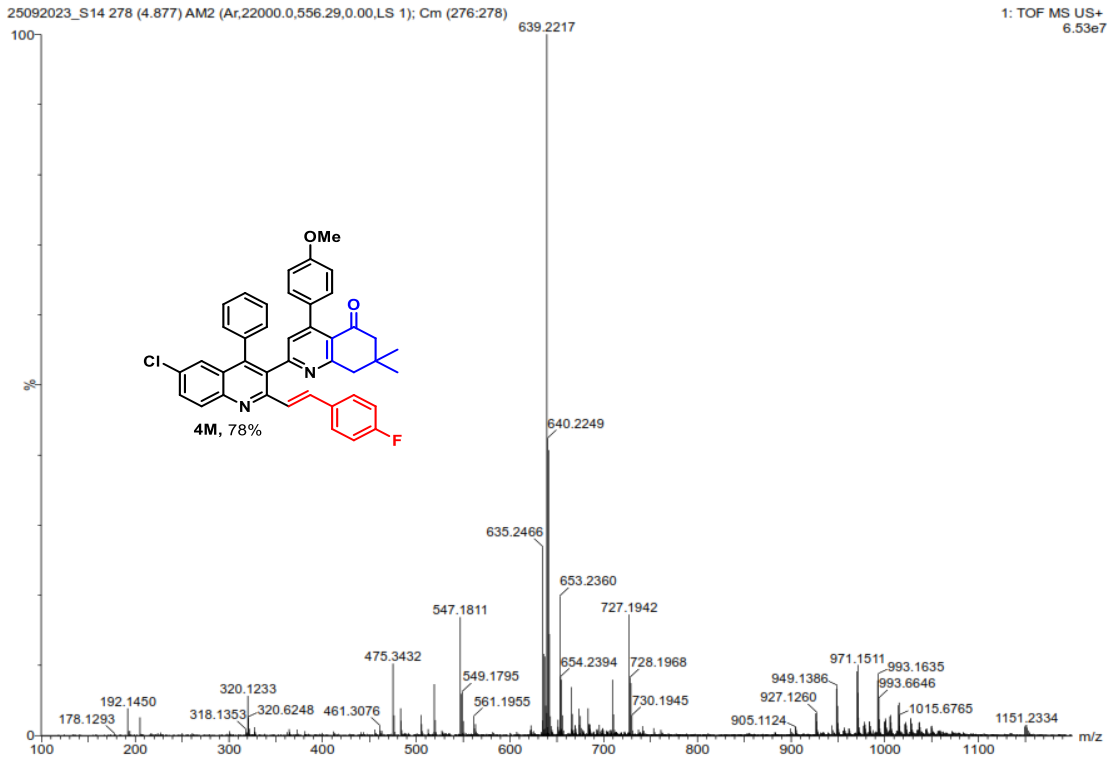

4N <sup>1</sup>H NMR (400 MHz, CDCl<sub>3</sub>)

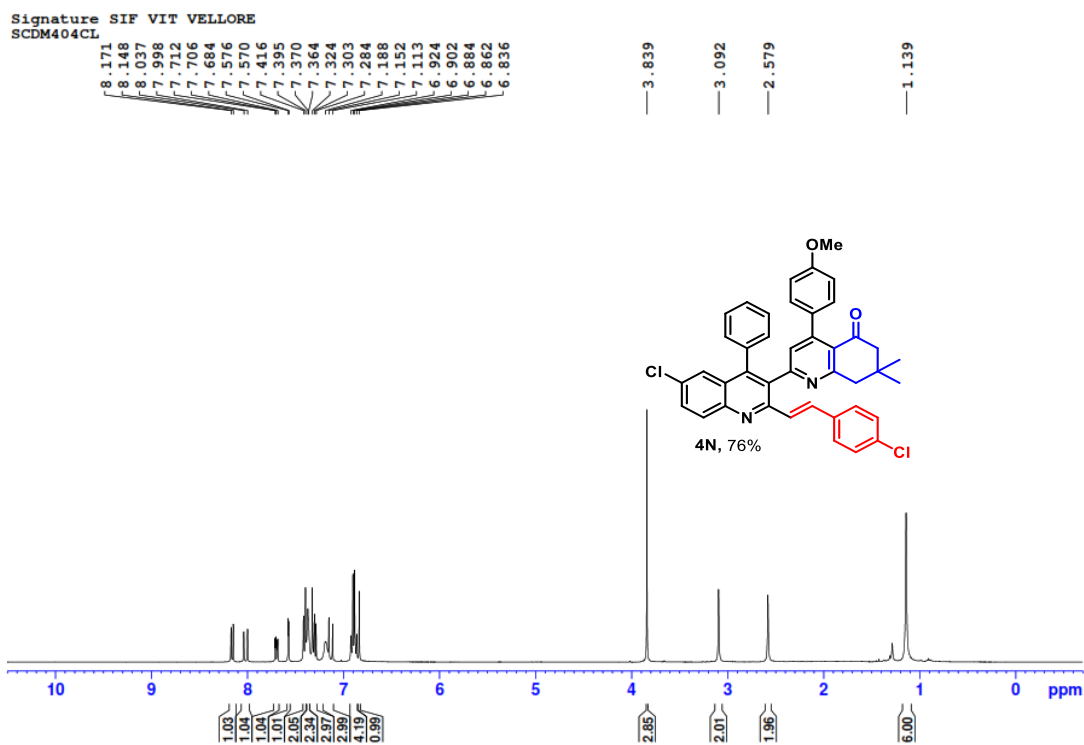

4N <sup>13</sup>C NMR (101 MHz, CDCl<sub>3</sub>)

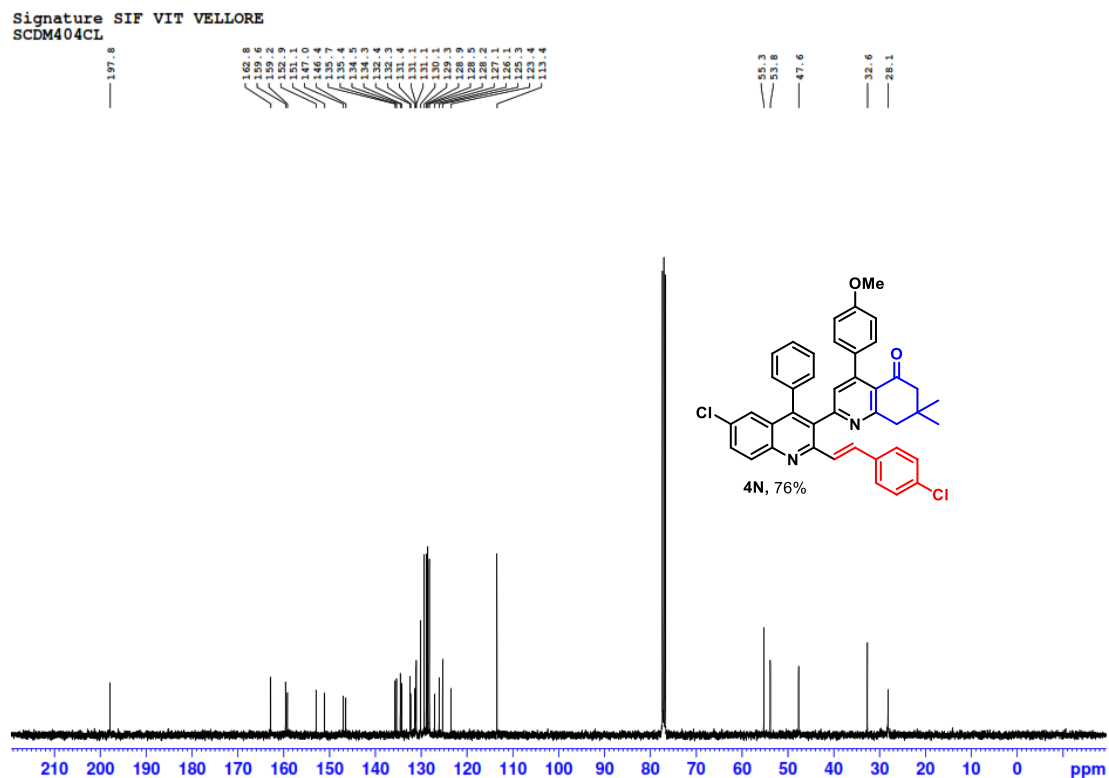

### 4N FTIR

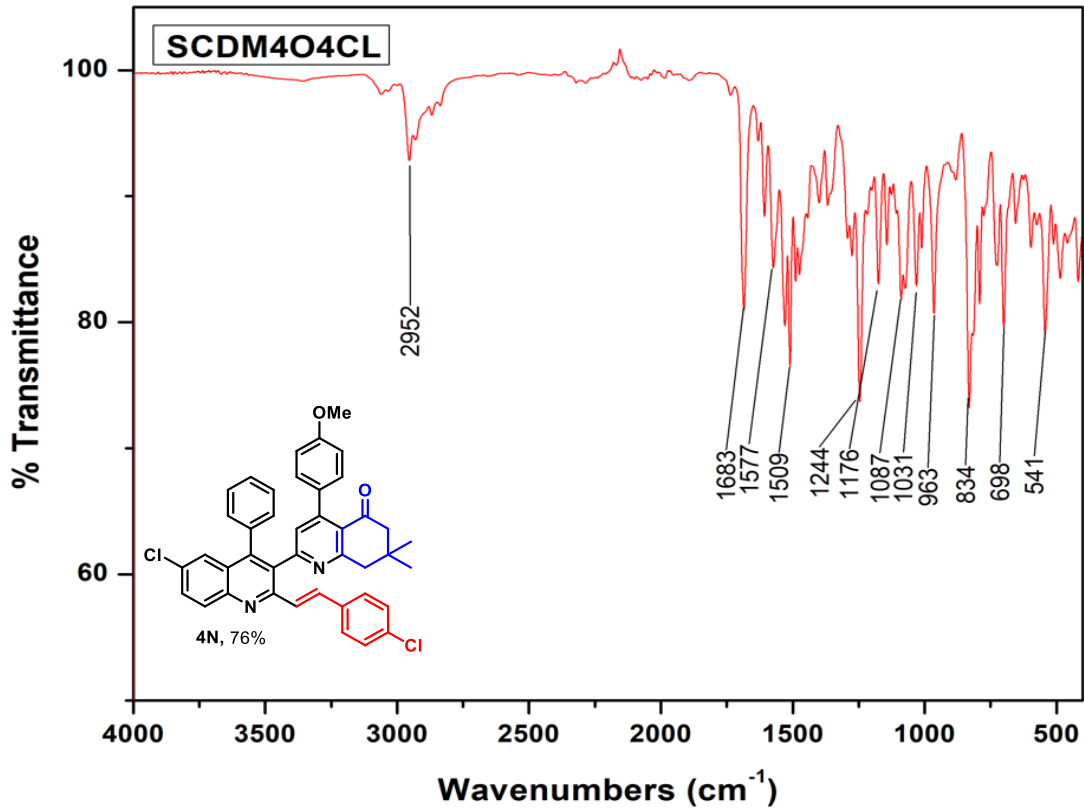

### 4N ESI (HRMS)

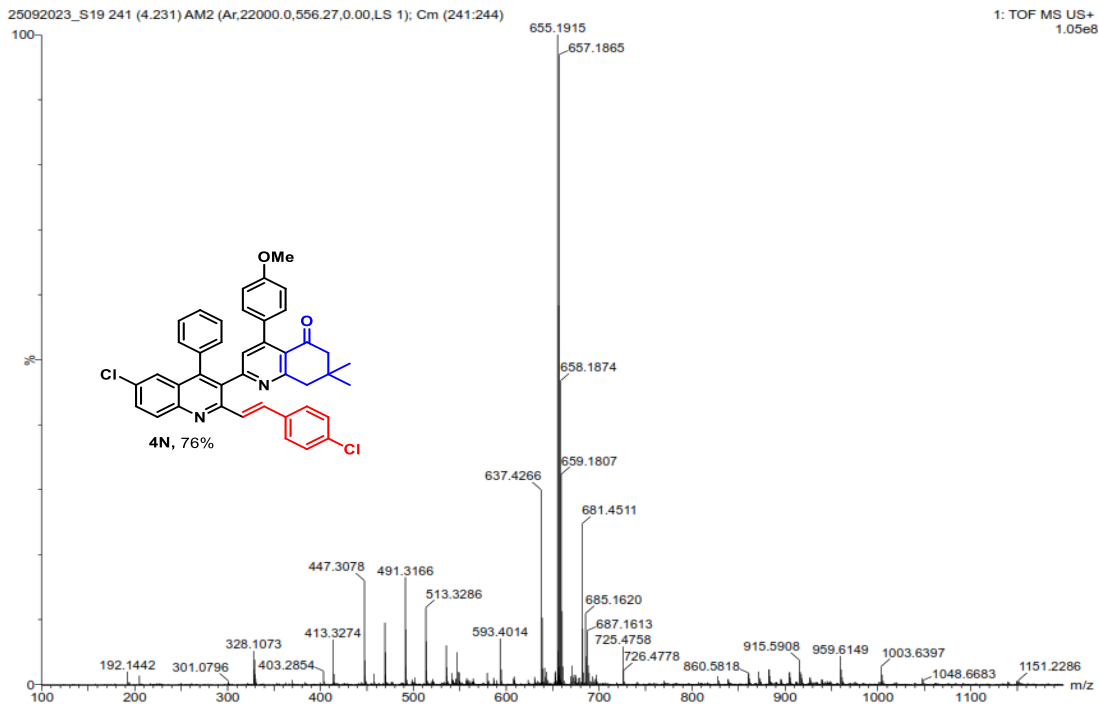



40 <sup>1</sup>H NMR (400 MHz, CDCl<sub>3</sub>)

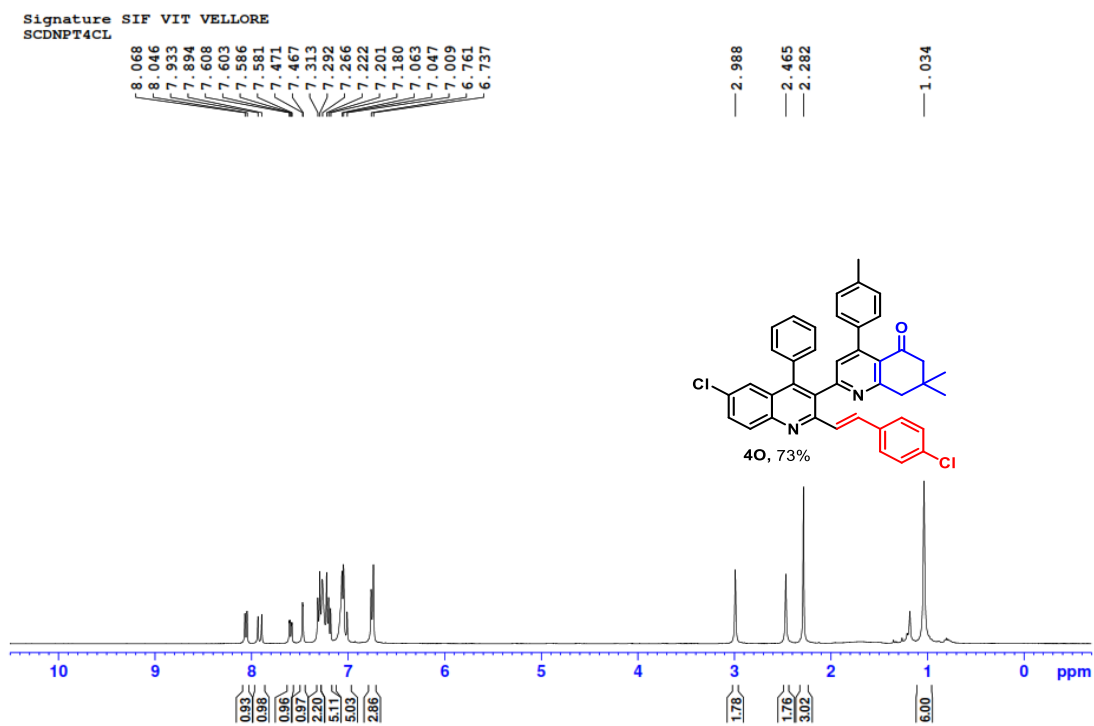

40 <sup>13</sup>C NMR (101 MHz, CDCl<sub>3</sub>)

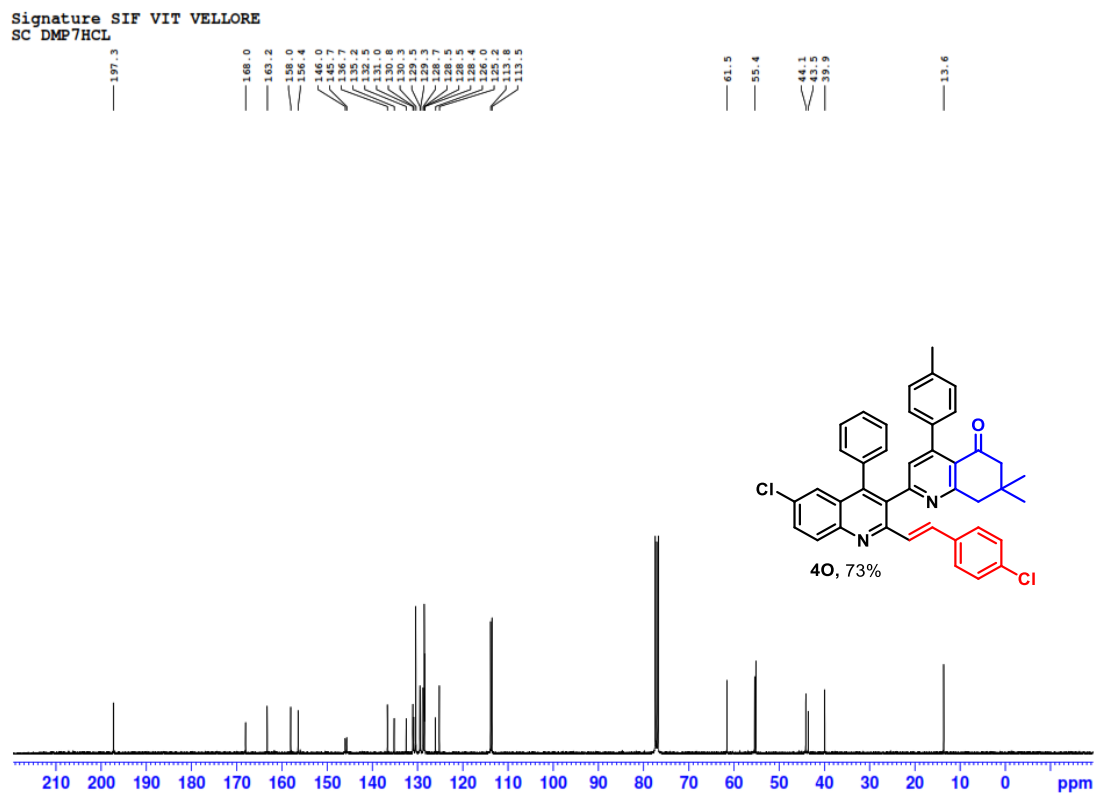

### 40 FTIR

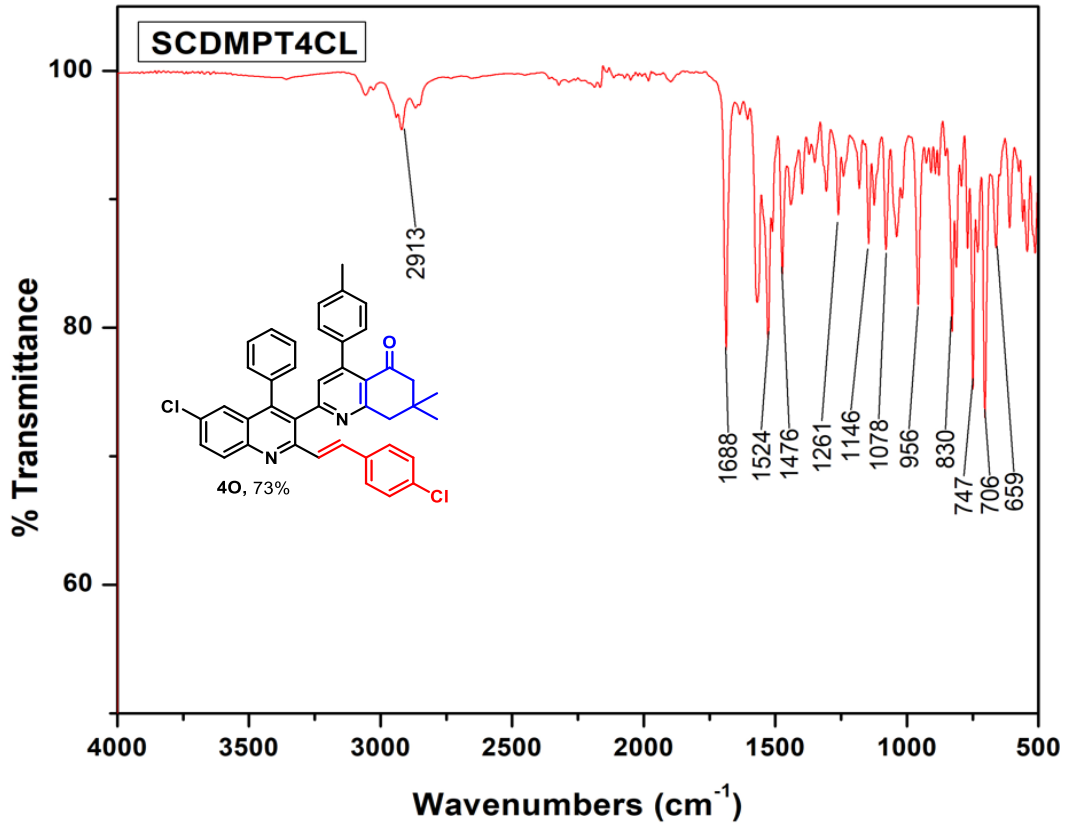

### 40 HRMS (ESI)

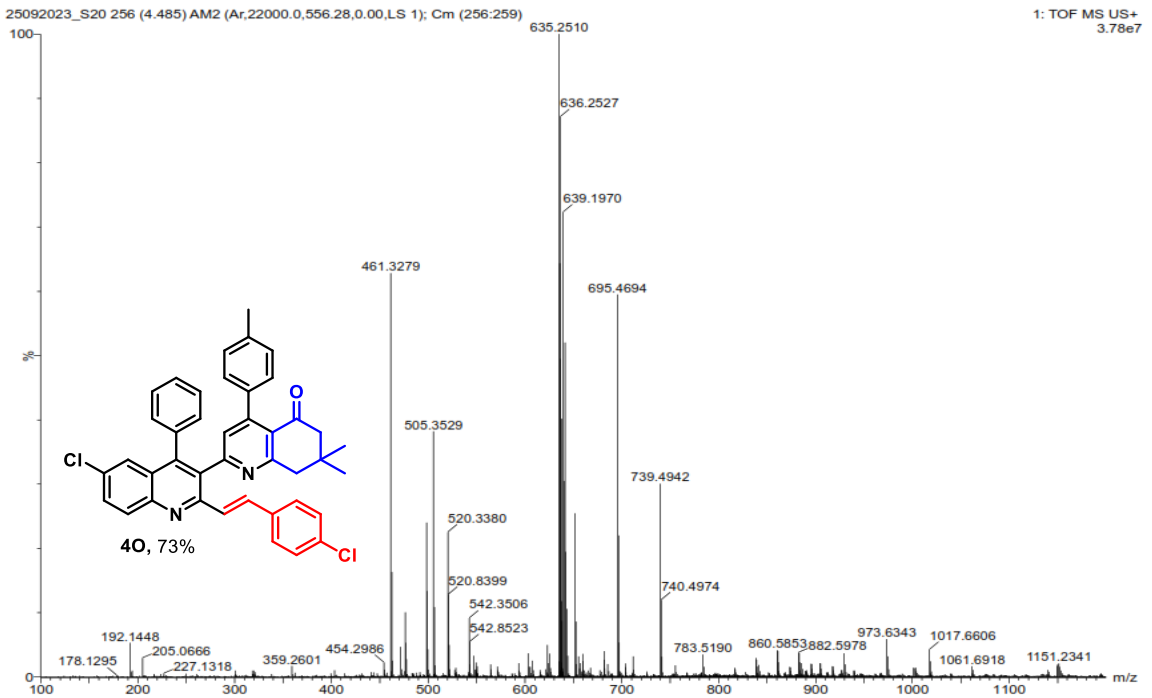

4P <sup>1</sup>H NMR (400 MHz, CDCl<sub>3</sub>)

Signature SIF VIT VELLORE  
SCOM2CL

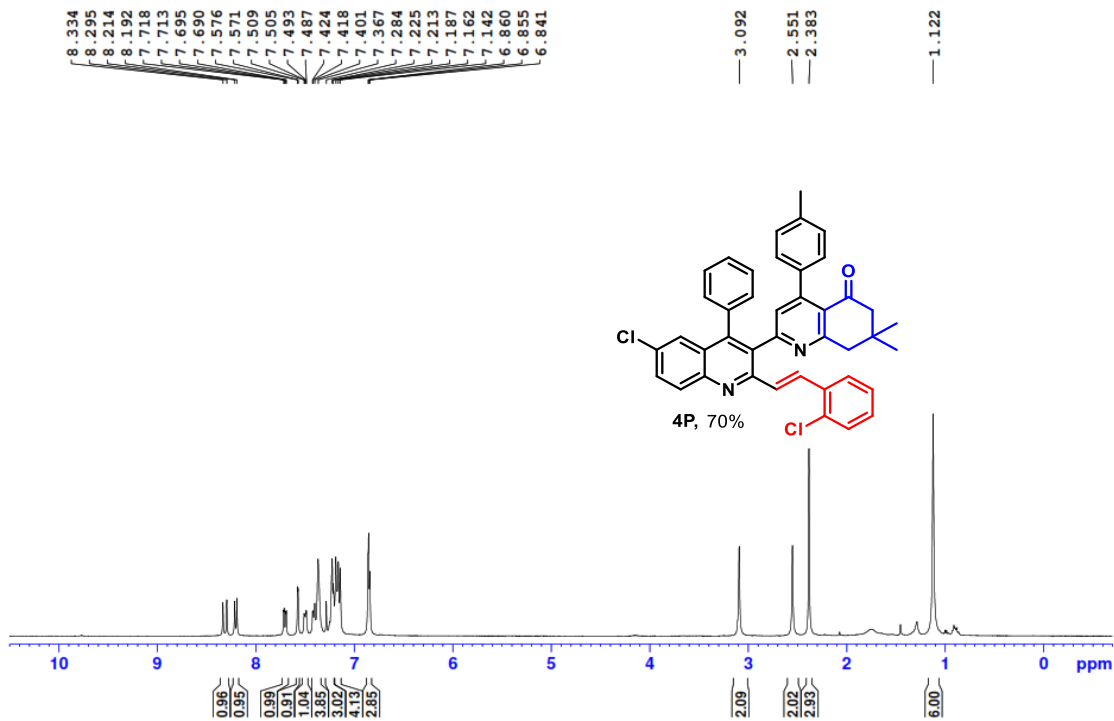

4P <sup>13</sup>C NMR (101 MHz, CDCl<sub>3</sub>)

Signature SIF VIT VELLORE  
SCOM2CL

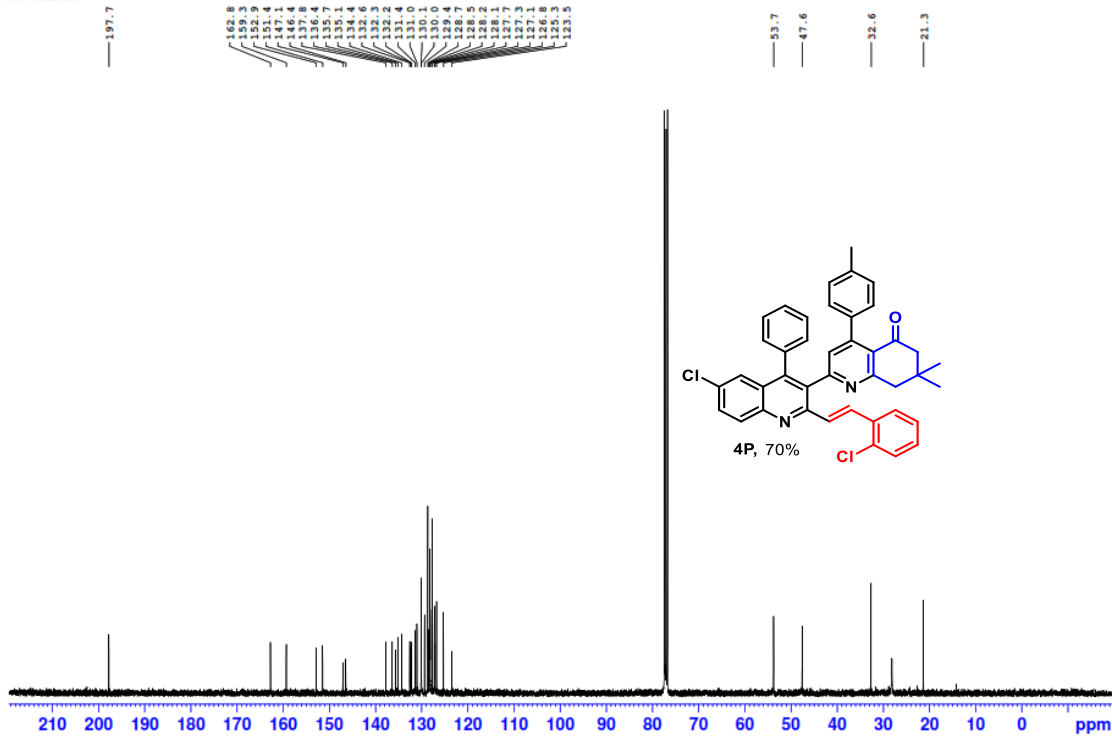

#### 4P FTIR

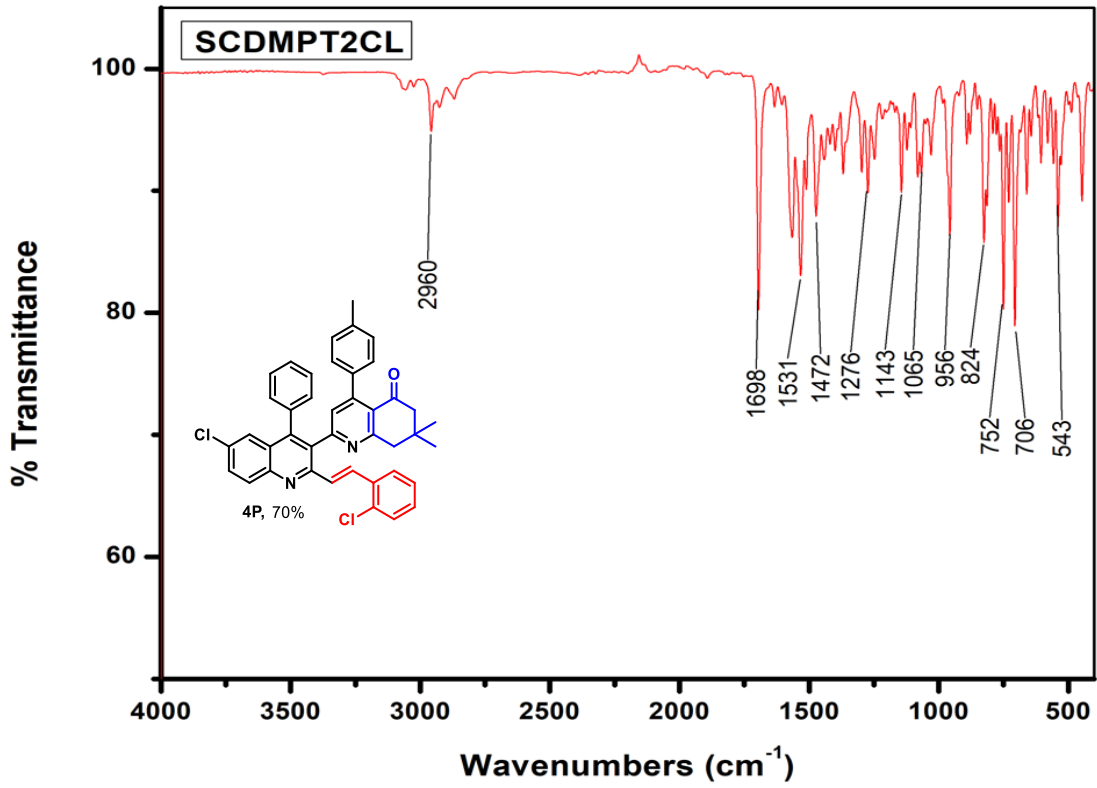

#### 4P HRMS (ESI)

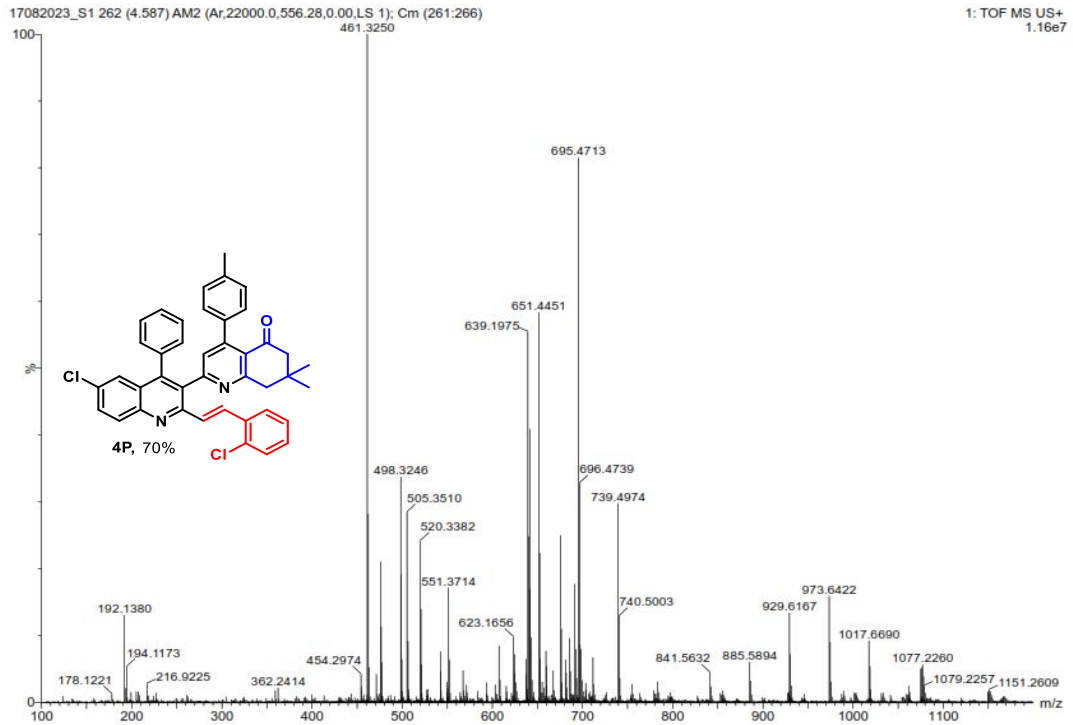

4Q <sup>1</sup>H NMR (400 MHz, CDCl<sub>3</sub>)

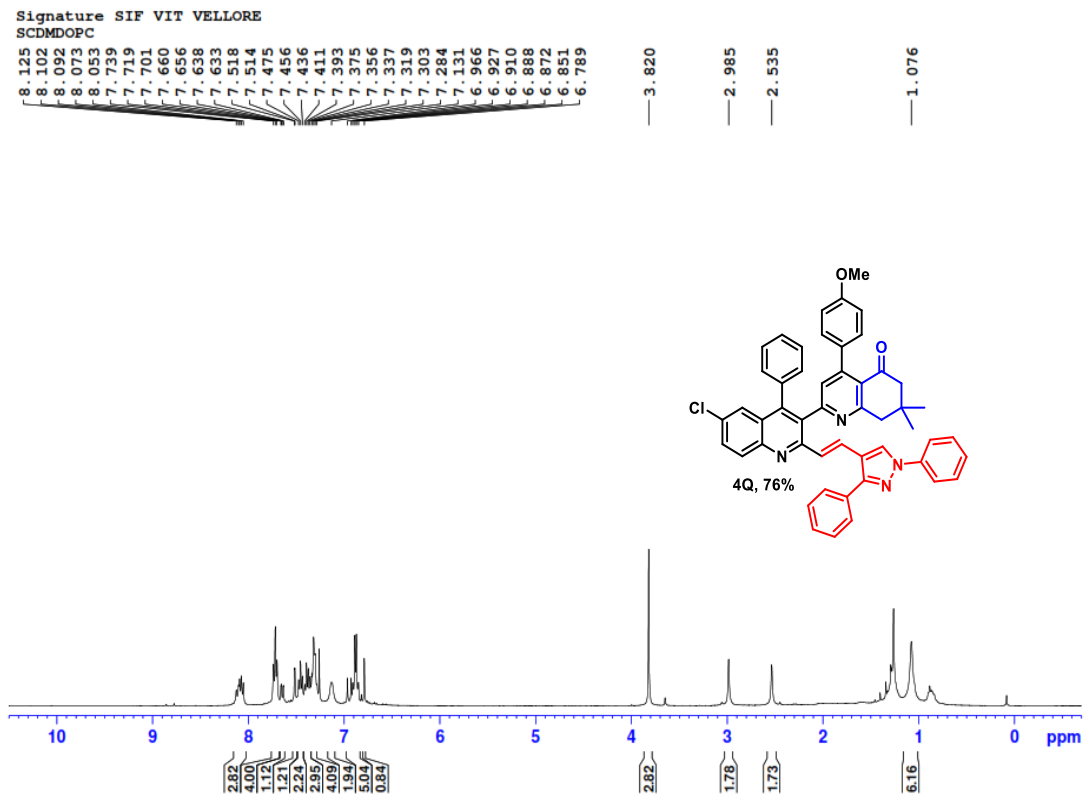

4Q <sup>13</sup>C NMR (101 MHz, CDCl<sub>3</sub>)

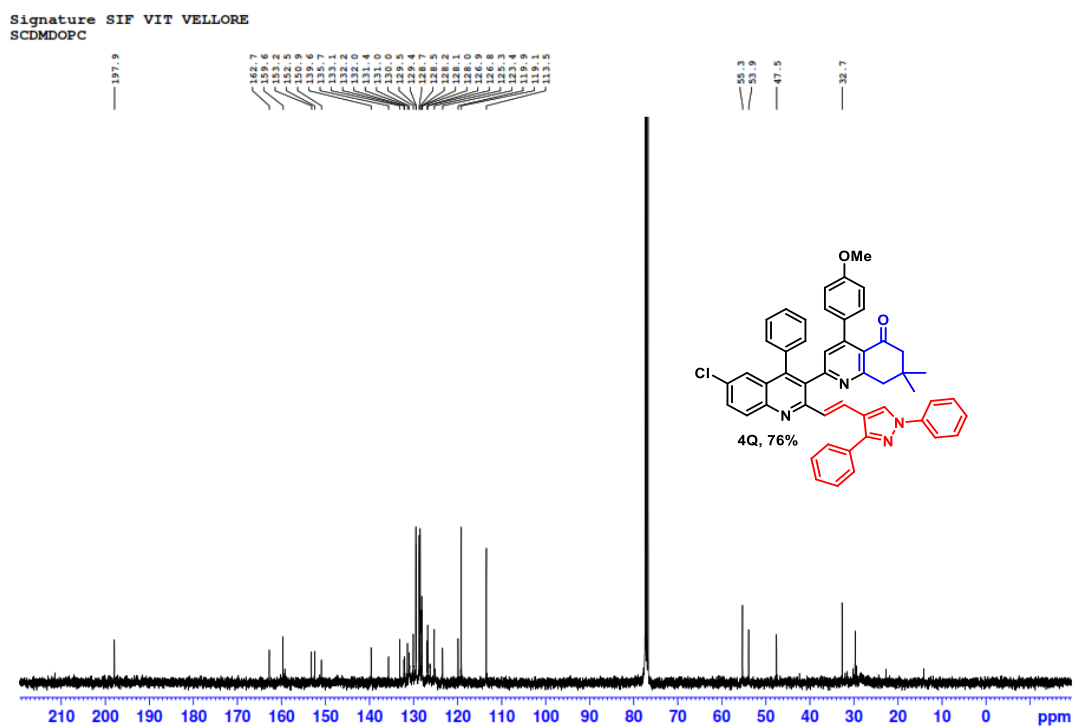

## 4Q FTIR

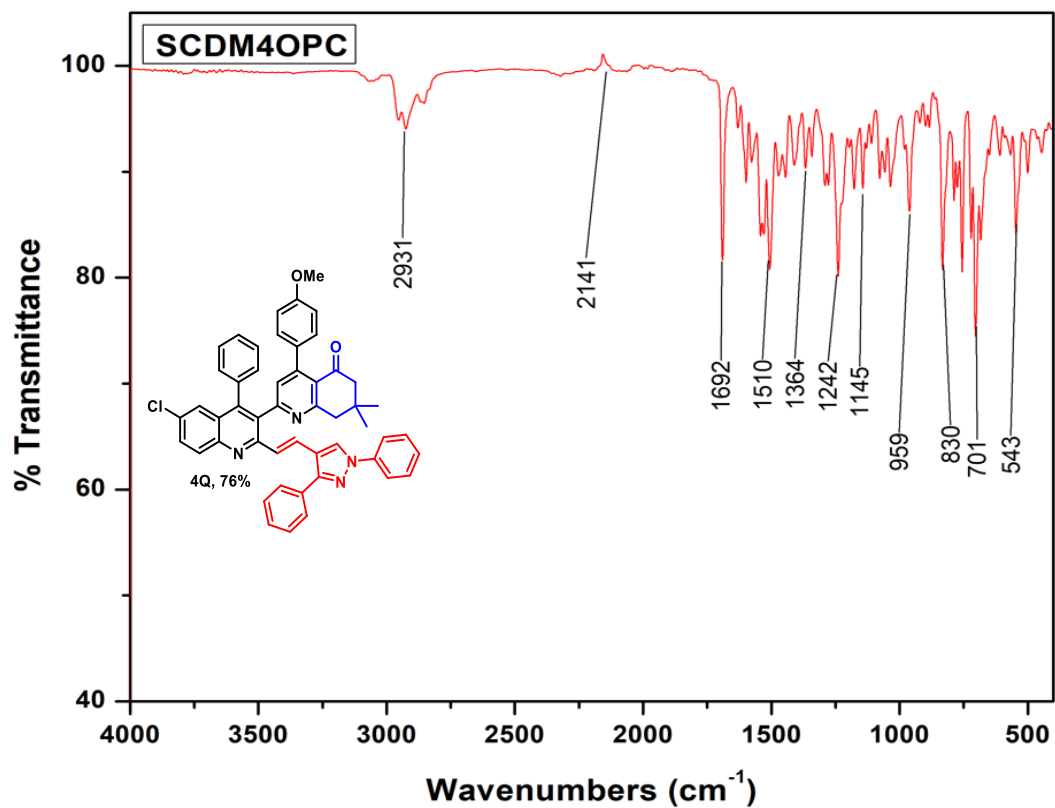

## 4Q HRMS (ESI)

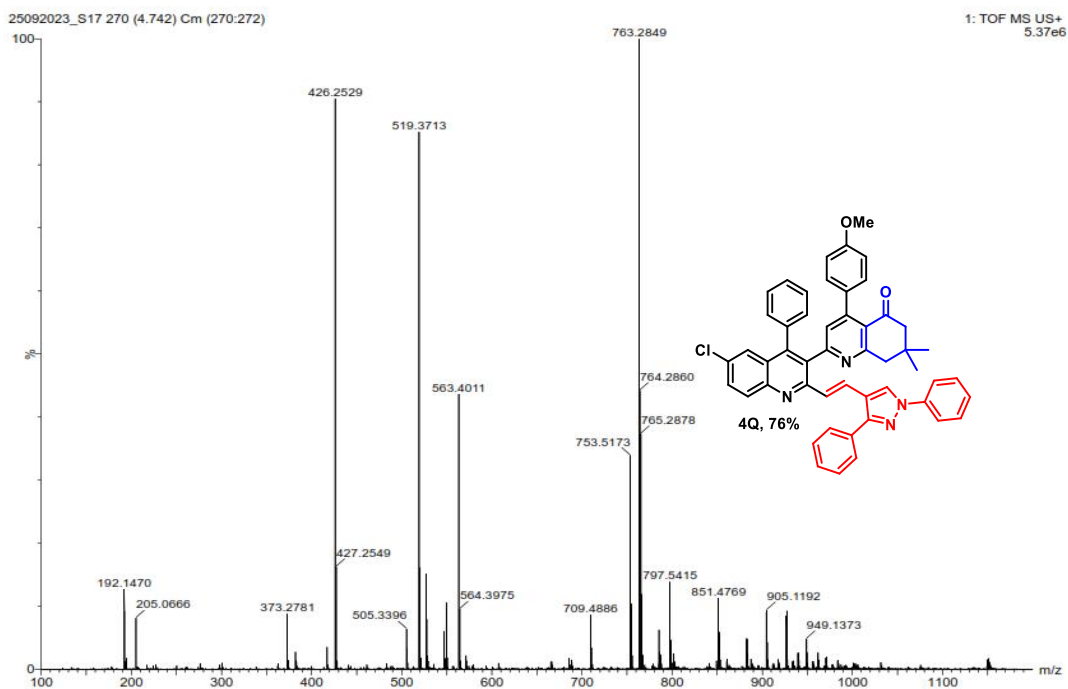

5A <sup>1</sup>H NMR (400 MHz, CDCl<sub>3</sub>)

Signature SIF VIT VELLORE  
SC4040

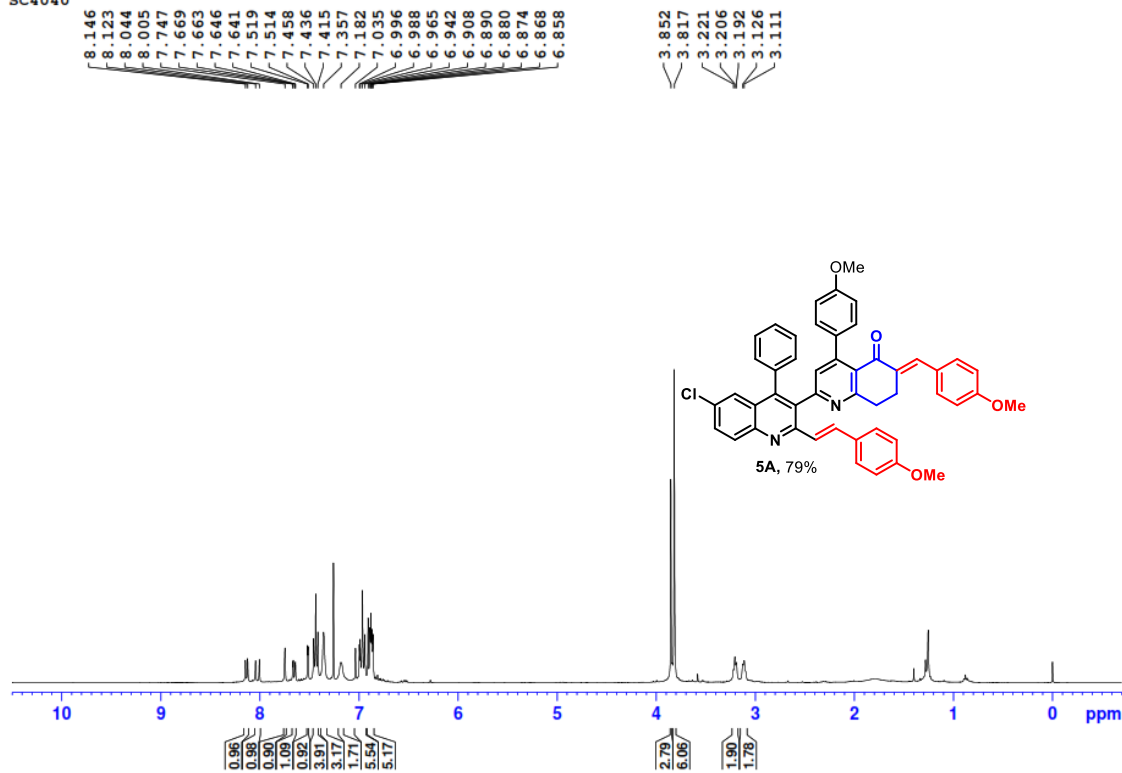

5A <sup>13</sup>C NMR (101 MHz, CDCl<sub>3</sub>)

Signature SIF VIT VELLORE  
SC4040

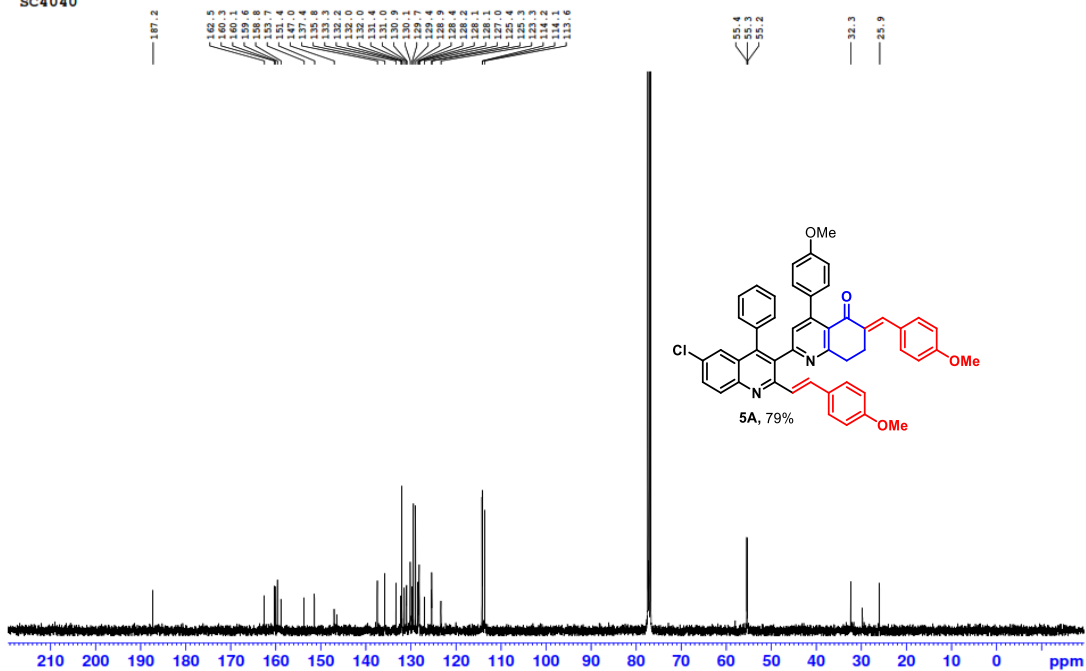

## 5A FTIR

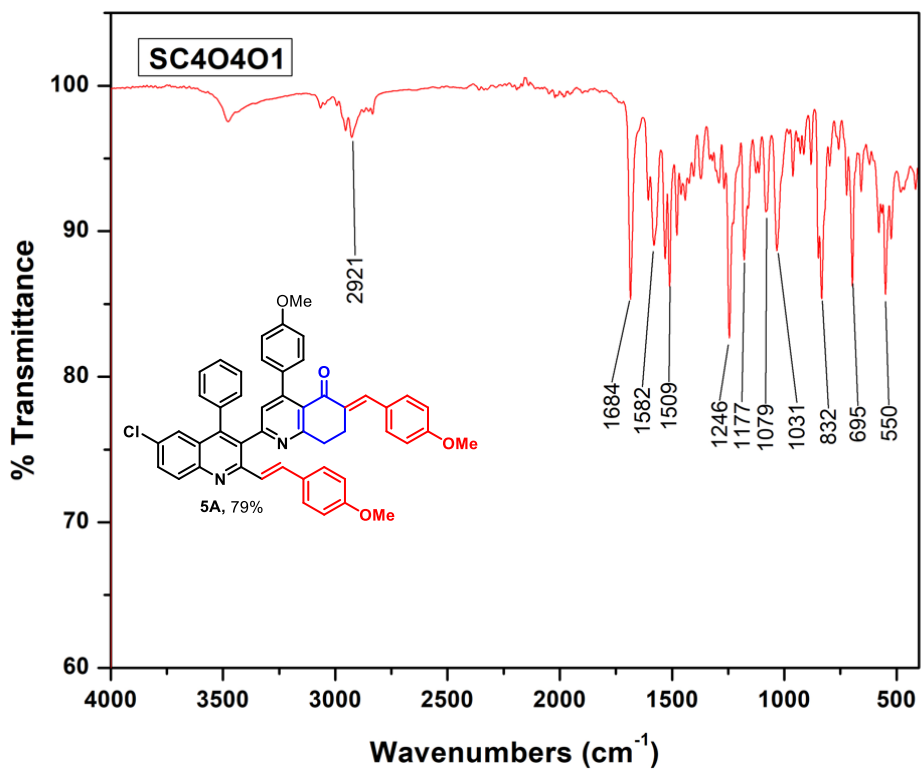

## 5A HRMS (ESI)

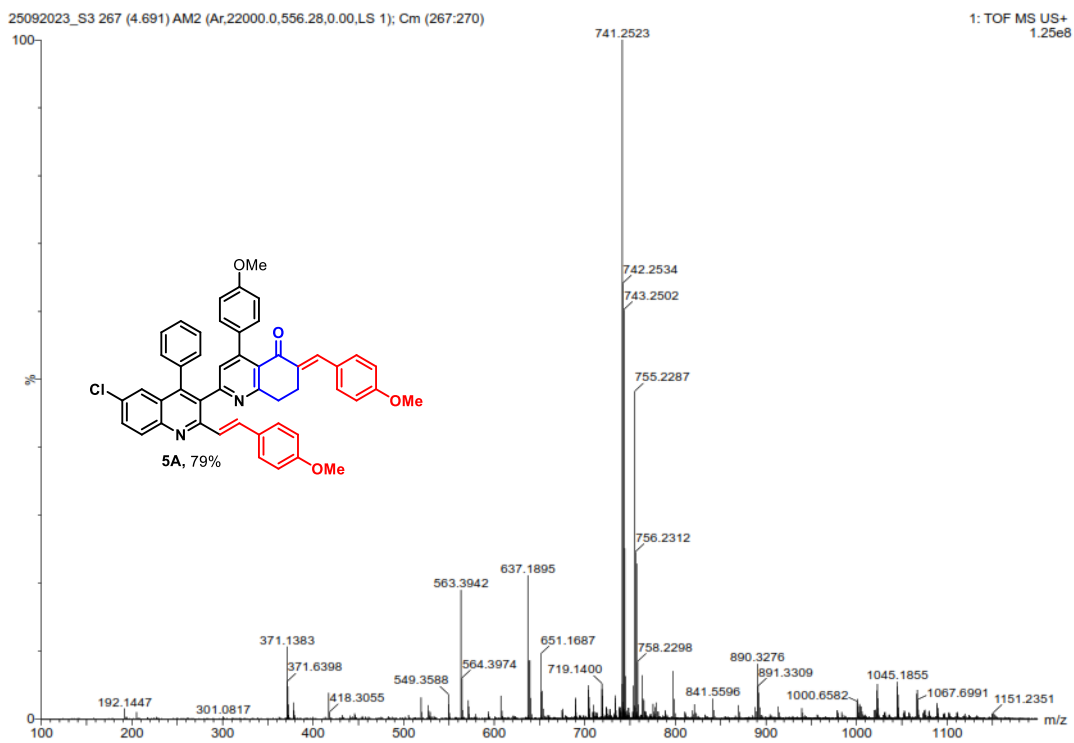



5B <sup>1</sup>H NMR (400 MHz, CDCl<sub>3</sub>)

Signature SIF VIT VELLORE  
3C40PT1

8.146  
8.124  
8.048  
8.009  
7.759  
7.668  
7.646  
7.522  
7.360  
7.250  
7.222  
7.160  
7.140  
7.127  
7.087  
6.982  
6.962  
6.907  
6.878  
6.858

3.816  
3.198  
3.184  
3.118  
3.105  
2.392  
2.351

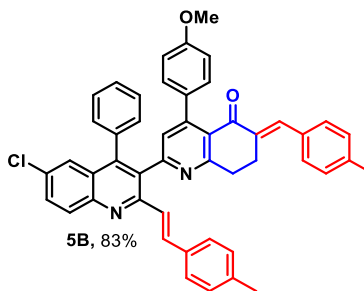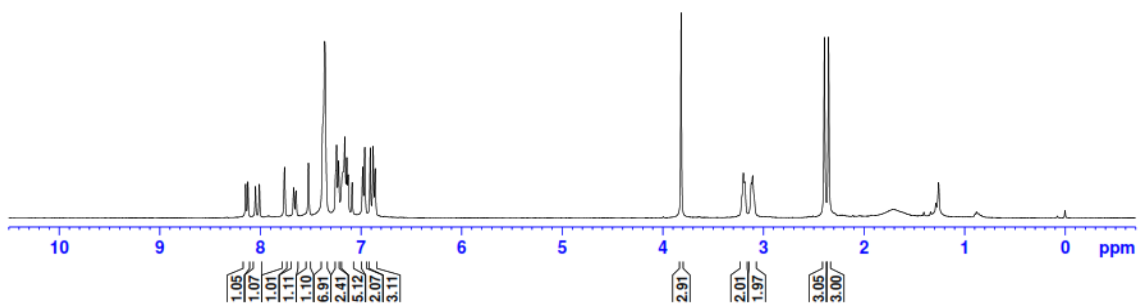

5B <sup>13</sup>C NMR (400 MHz, CDCl<sub>3</sub>)

Signature SIF VIT VELLORE  
SC40PT1

187.2  
182.7  
159.6  
159.6  
159.6  
151.5  
151.5  
147.0  
147.0  
147.0  
139.3  
139.3  
137.6  
137.6  
137.6  
135.8  
134.5  
134.5  
134.5  
134.5  
132.3  
132.3  
132.1  
132.1  
131.1  
131.1  
130.9  
130.9  
130.1  
130.1  
129.4  
129.4  
129.3  
129.3  
128.2  
128.2  
128.1  
127.4  
127.4  
125.3  
125.3  
124.6  
124.6  
115.6

55.2  
32.4  
25.9  
21.5  
21.4

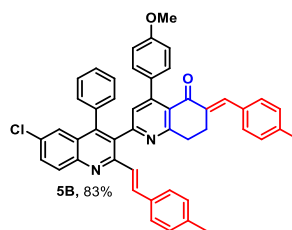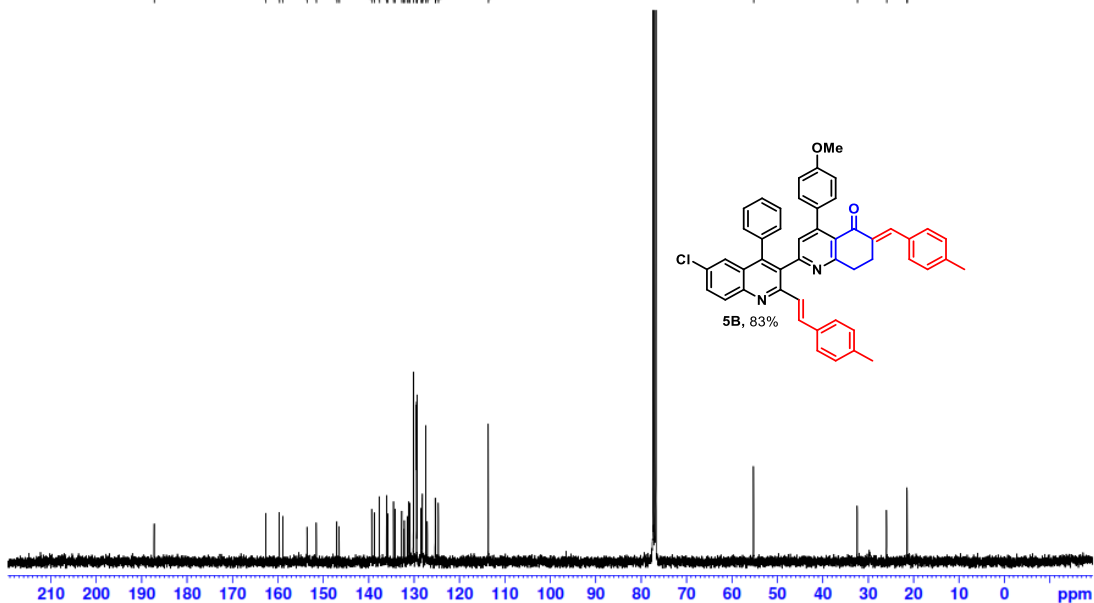

### 5B FTIR

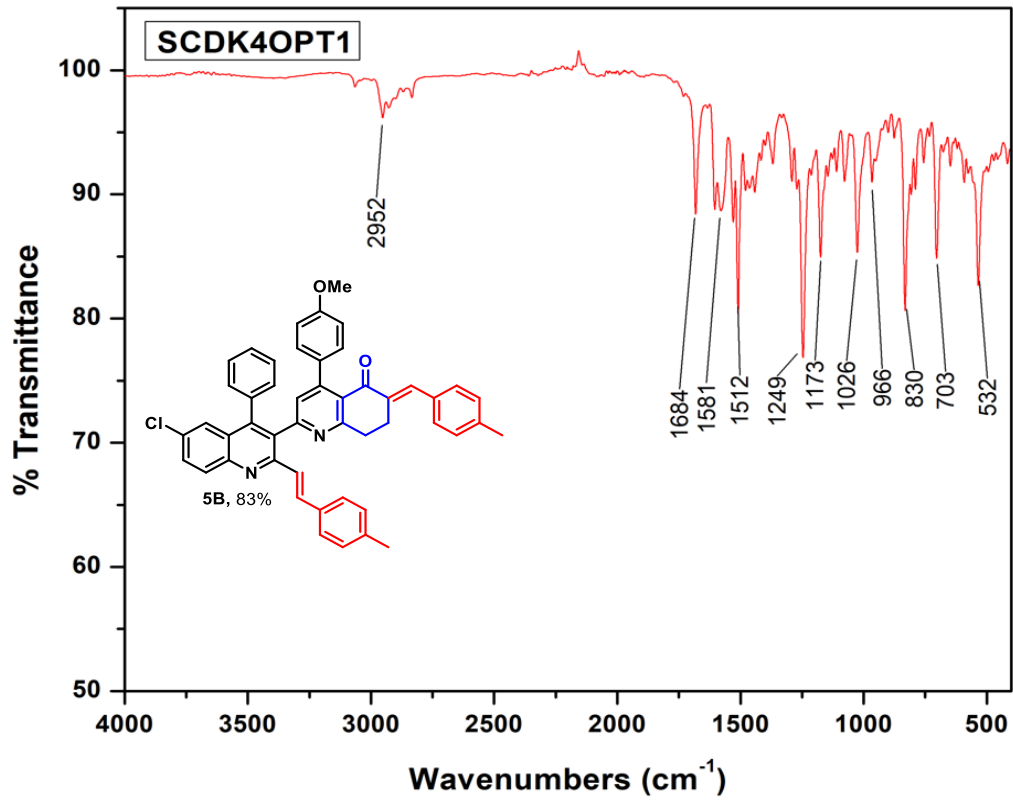

### 5B HRMS (ESI)

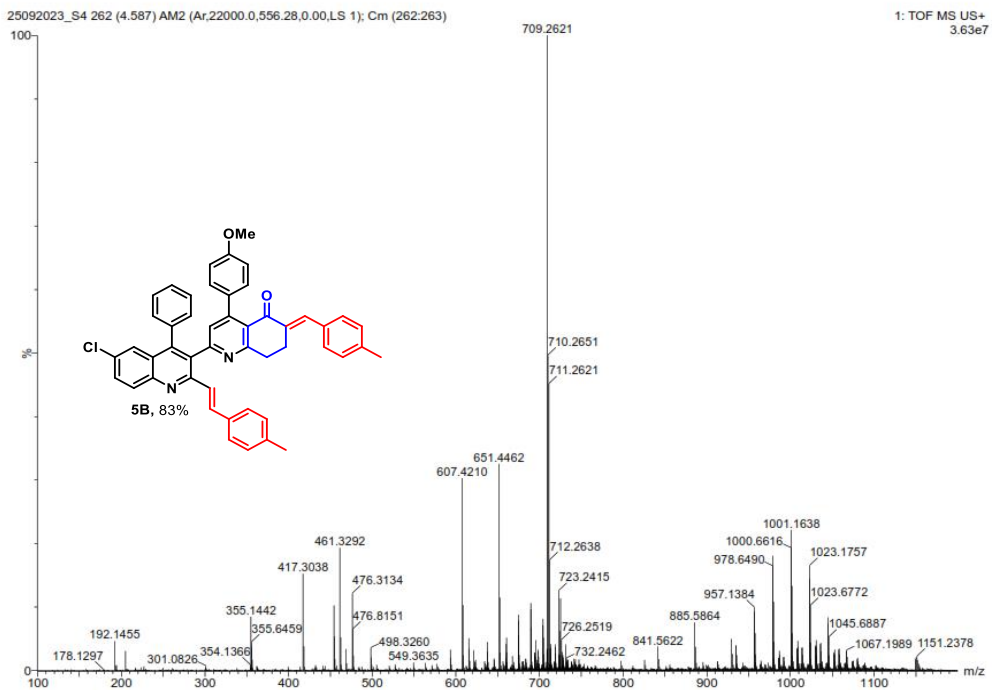

# 5C <sup>1</sup>H NMR (400 MHz, CDCl<sub>3</sub>)

Signature SIF VIT VELLORE  
SC40SH

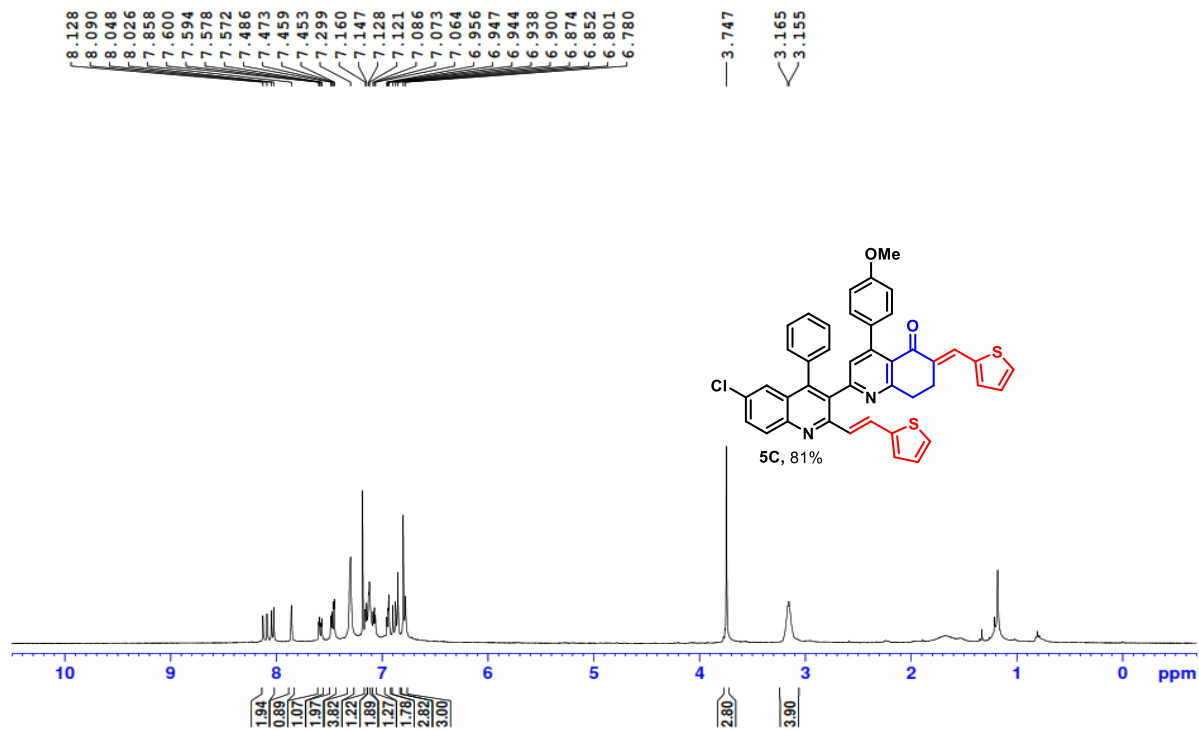

# Q <sup>13</sup>C NMR (101 MHz, CDCl<sub>3</sub>)

Signature SIF VIT VELLORE  
SC40SH

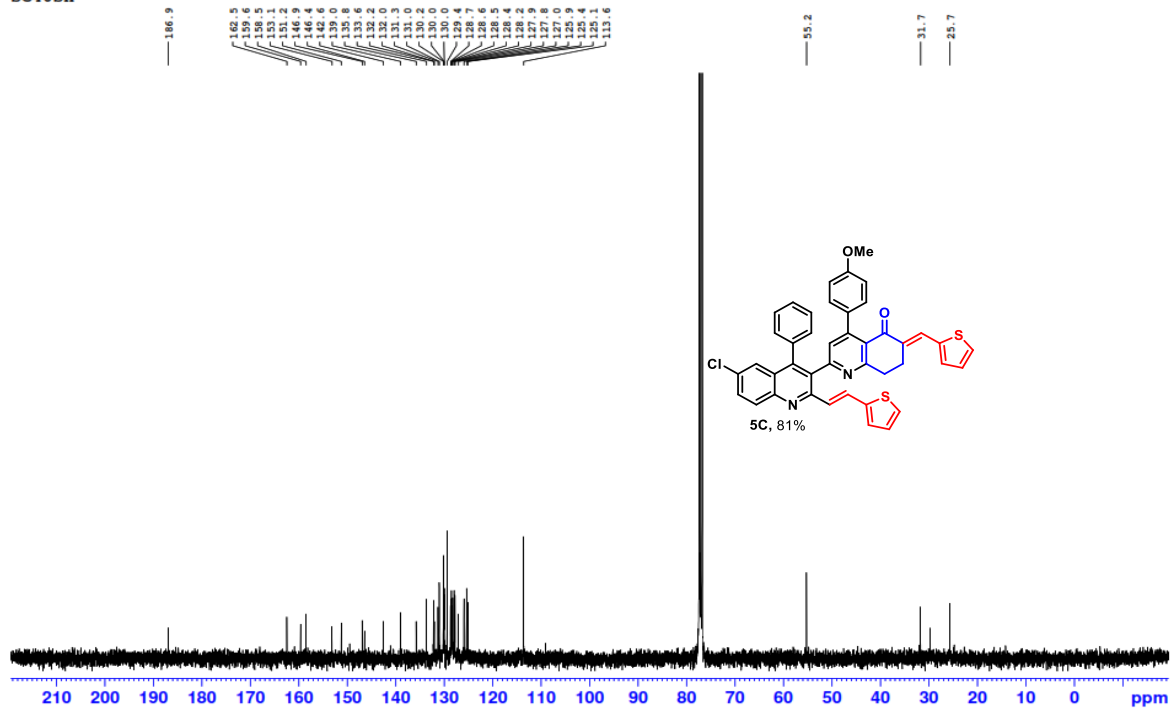

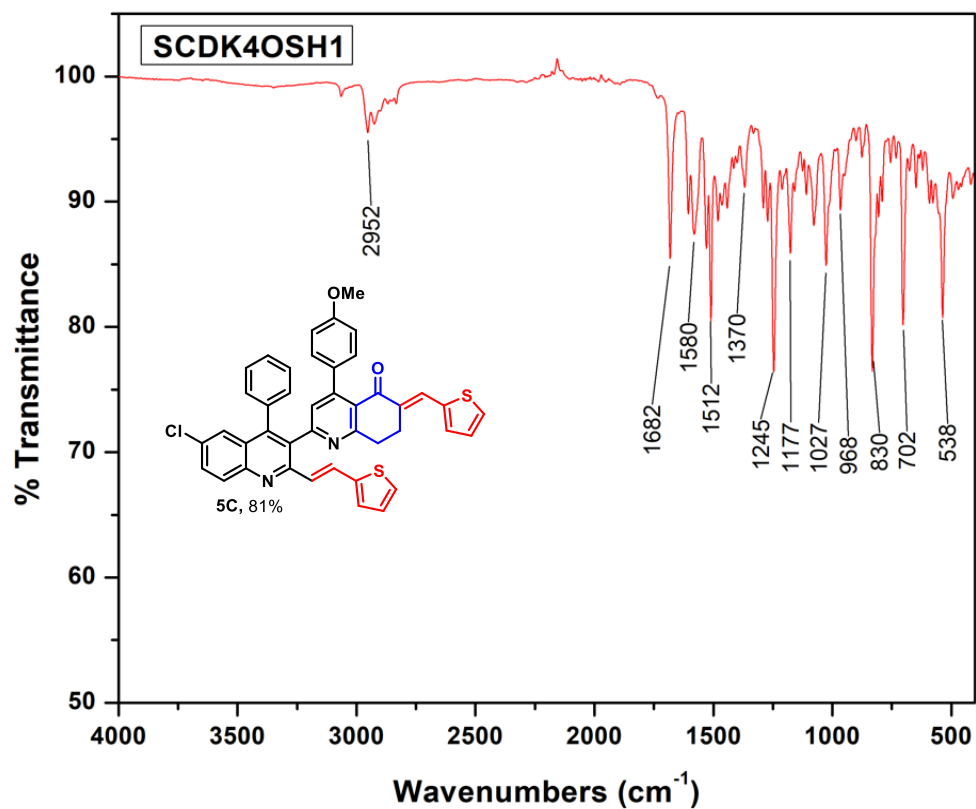

**5C HRMS (ESI)**

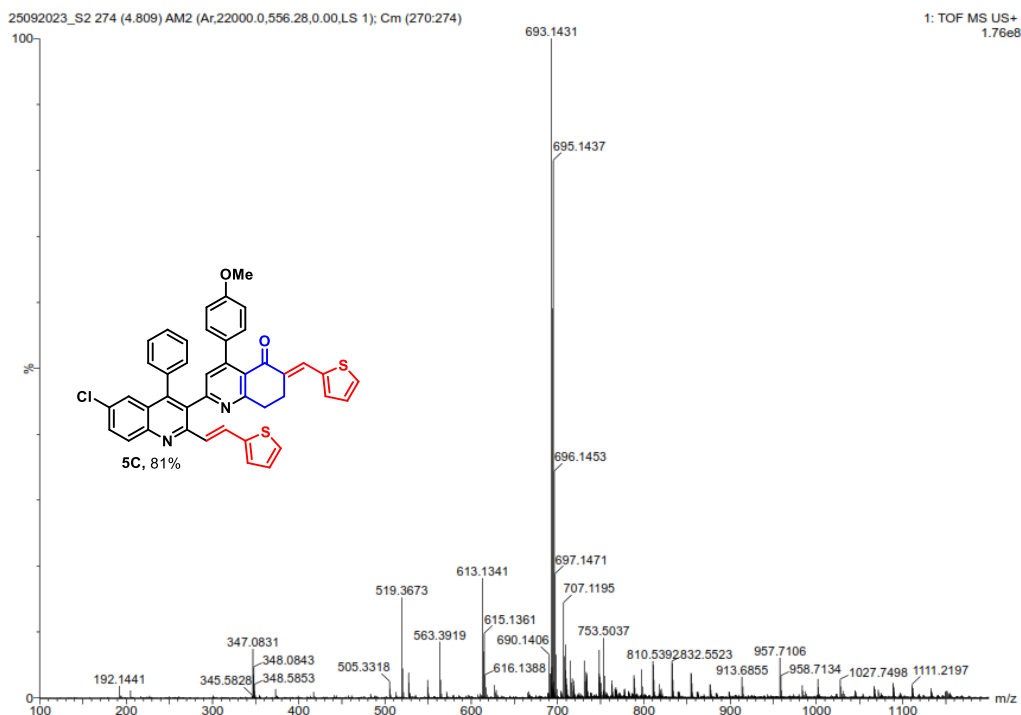

5D <sup>1</sup>H NMR (400 MHz, CDCl<sub>3</sub>)

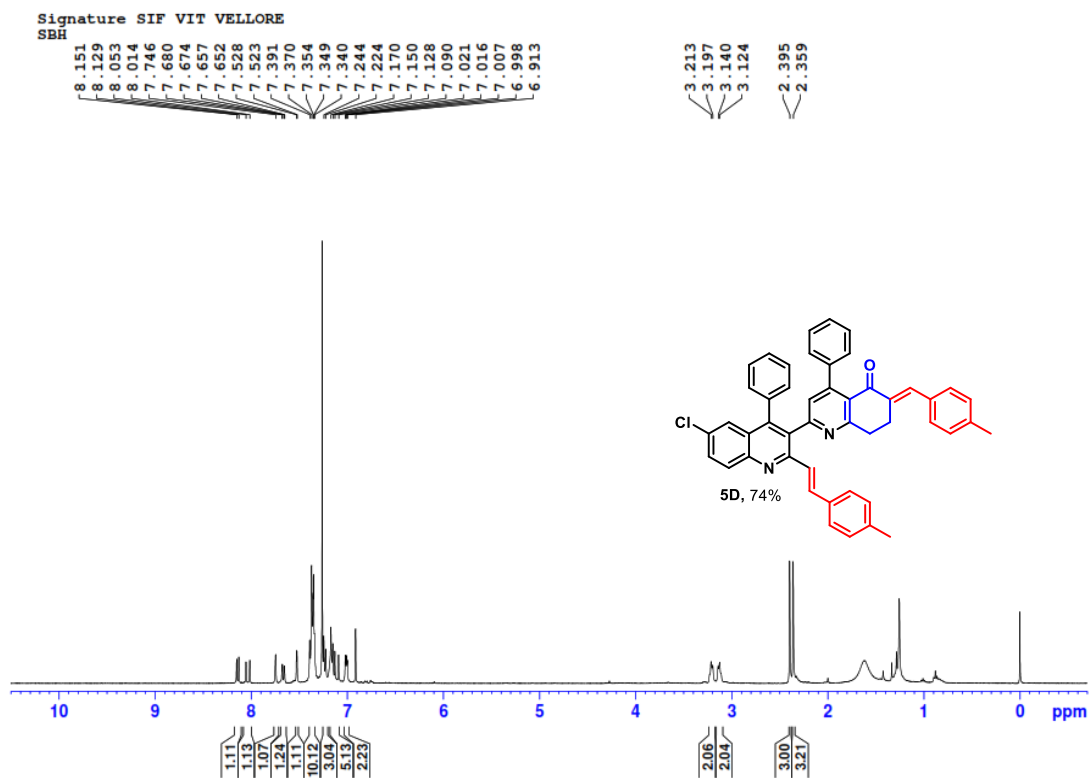

5D <sup>13</sup>C NMR (101 MHz, CDCl<sub>3</sub>)

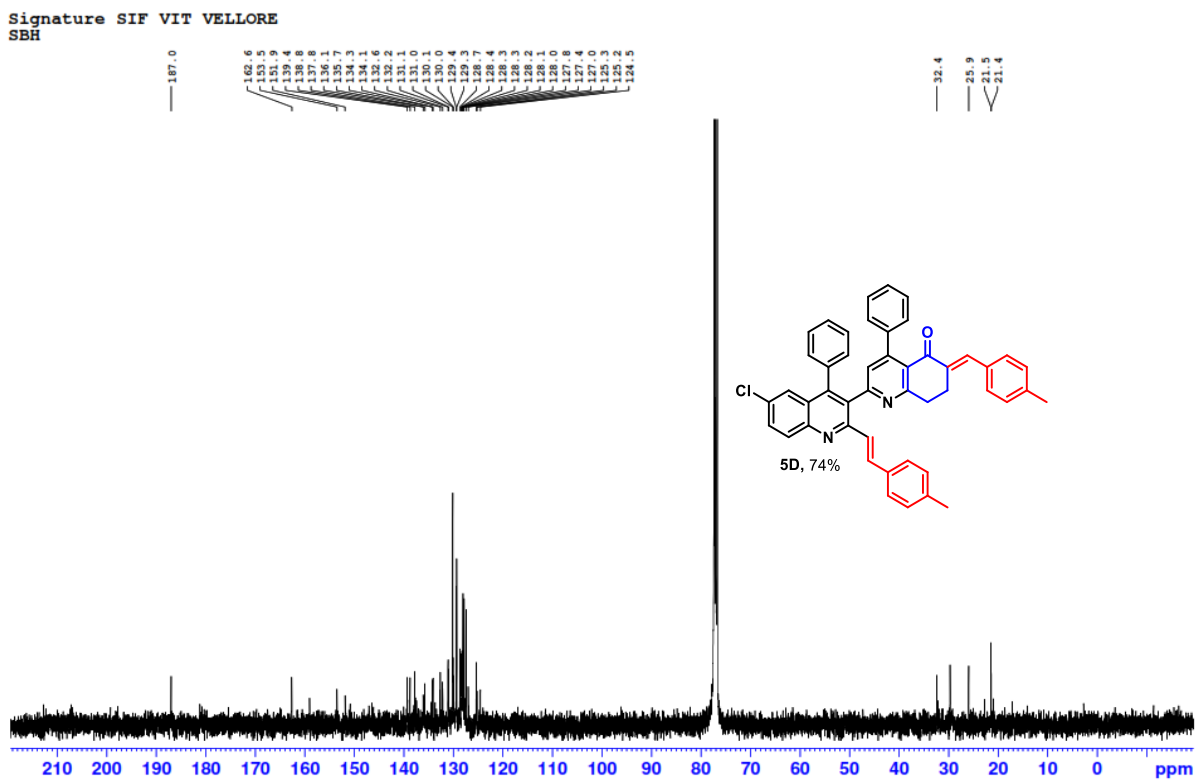

## 5D FTIR

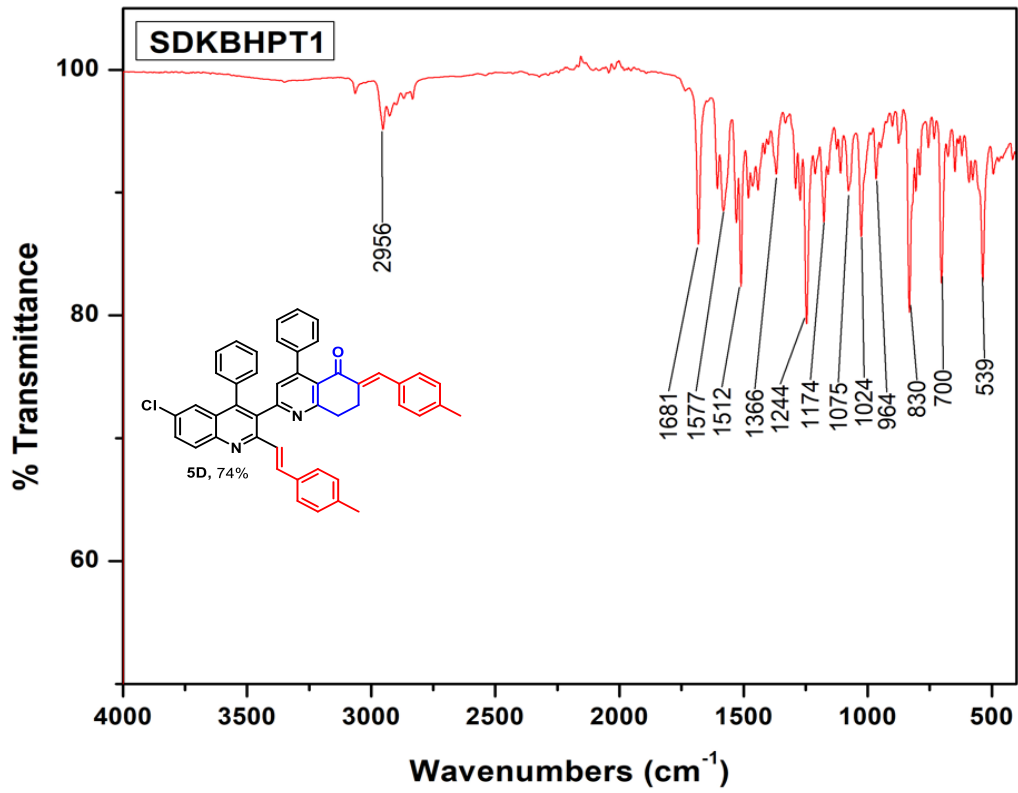

## 5D HRMS (ESI)

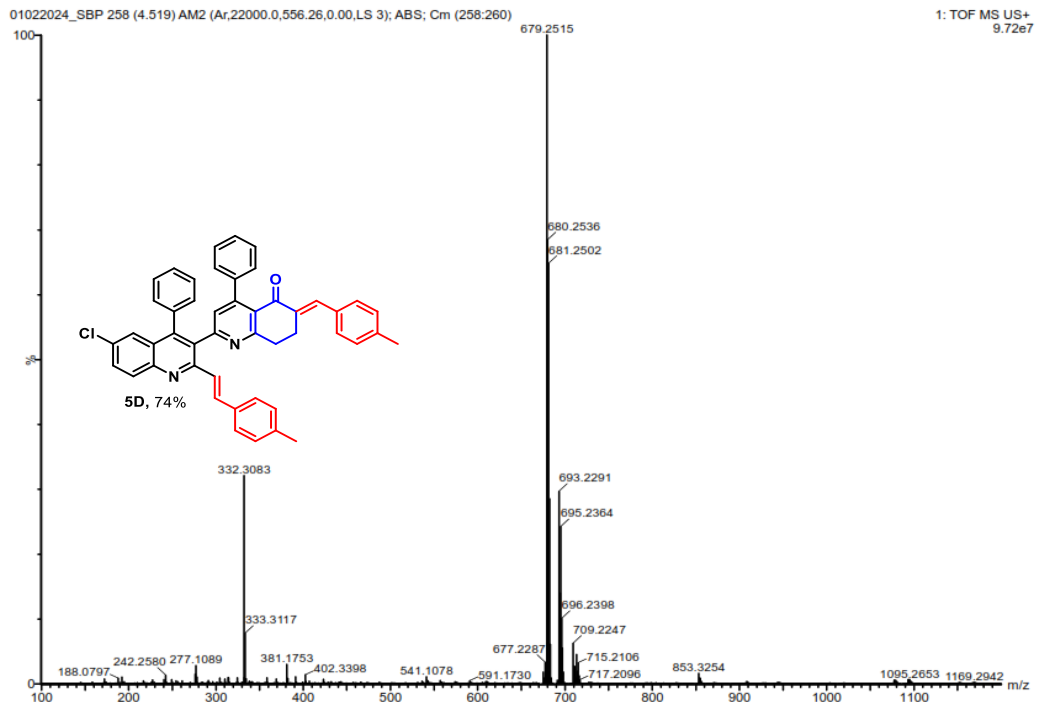

5E <sup>1</sup>H NMR (400 MHz, CDCl<sub>3</sub>)

Signature SIF VIT VELLORE  
SC402CL1

8.326  
8.290  
8.209  
7.910  
7.709  
7.551  
7.531  
7.473  
7.404  
7.332  
7.276  
7.244  
6.973  
6.921

3.850  
3.152  
3.072

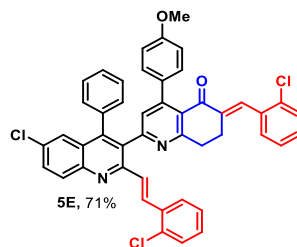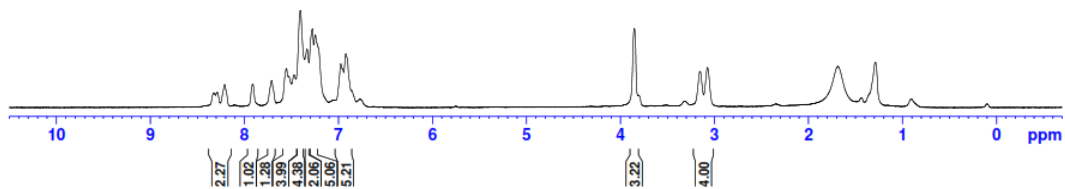

5E <sup>13</sup>C NMR (101 MHz, CDCl<sub>3</sub>)

Signature SIF VIT VELLORE  
SC402CL

186.5  
163.0  
159.7  
159.0  
159.0  
153.0  
152.1  
152.1  
146.4  
136.7  
135.7  
135.2  
135.2  
134.4  
134.3  
134.1  
134.1  
132.4  
132.4  
132.2  
131.5  
131.4  
131.4  
130.2  
130.1  
130.0  
130.0  
129.3  
129.3  
128.6  
128.3  
128.2  
128.2  
127.2  
127.2  
126.9  
126.4  
126.4  
125.3  
125.3  
113.6

53.2  
32.6  
26.0

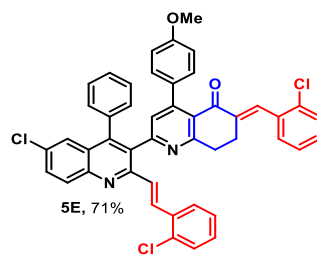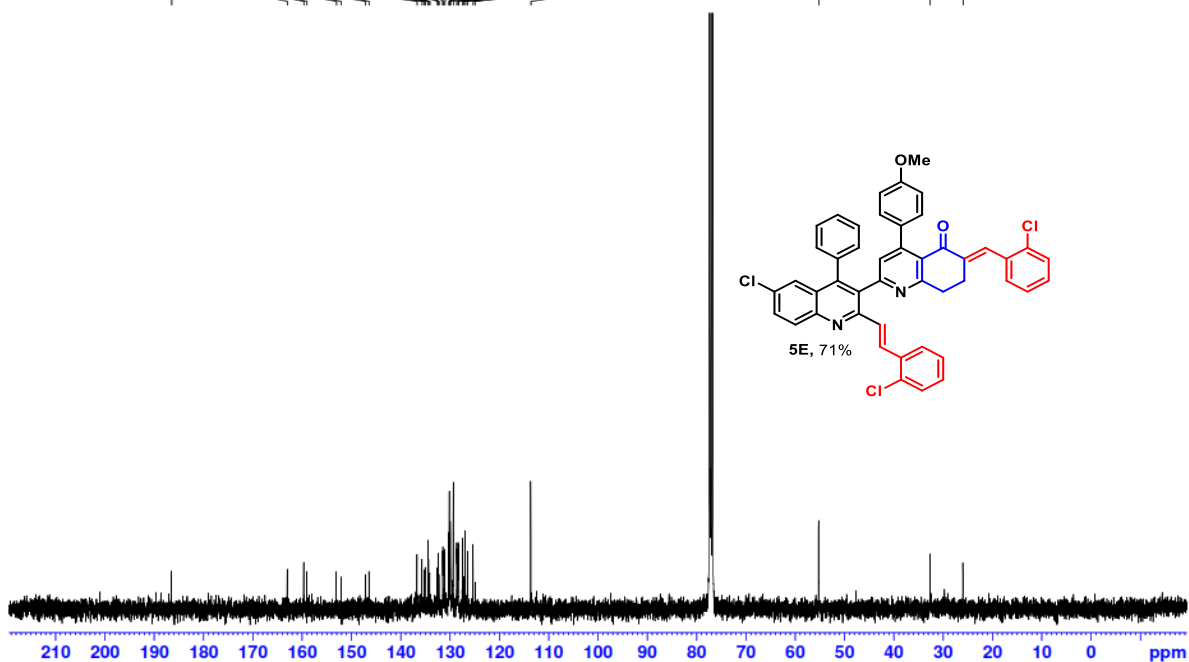

### 5E FTIR

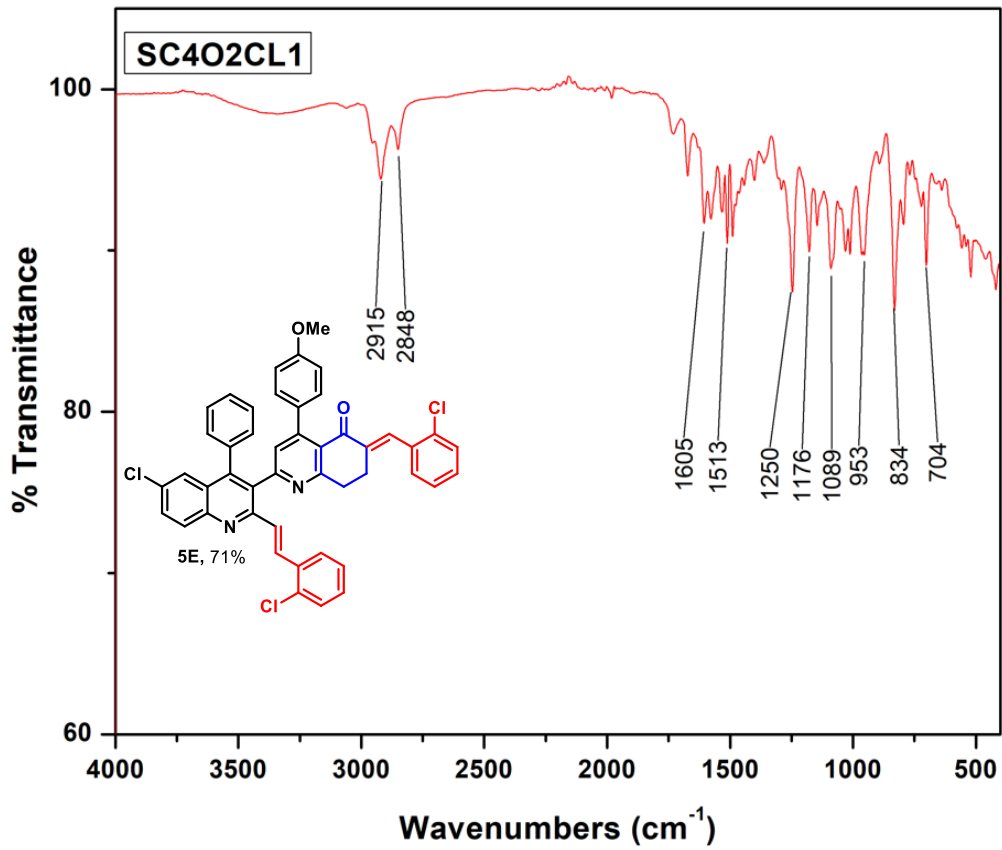

### 5E HRMS (ESI)

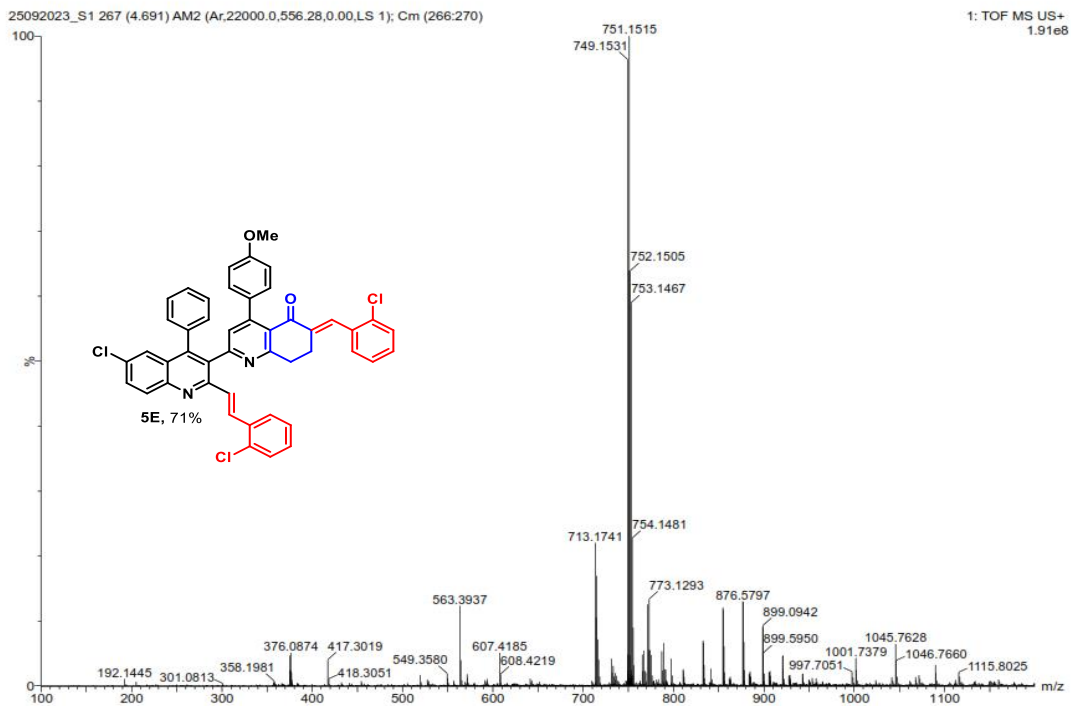



5F <sup>1</sup>H NMR (400 MHz, CDCl<sub>3</sub>)

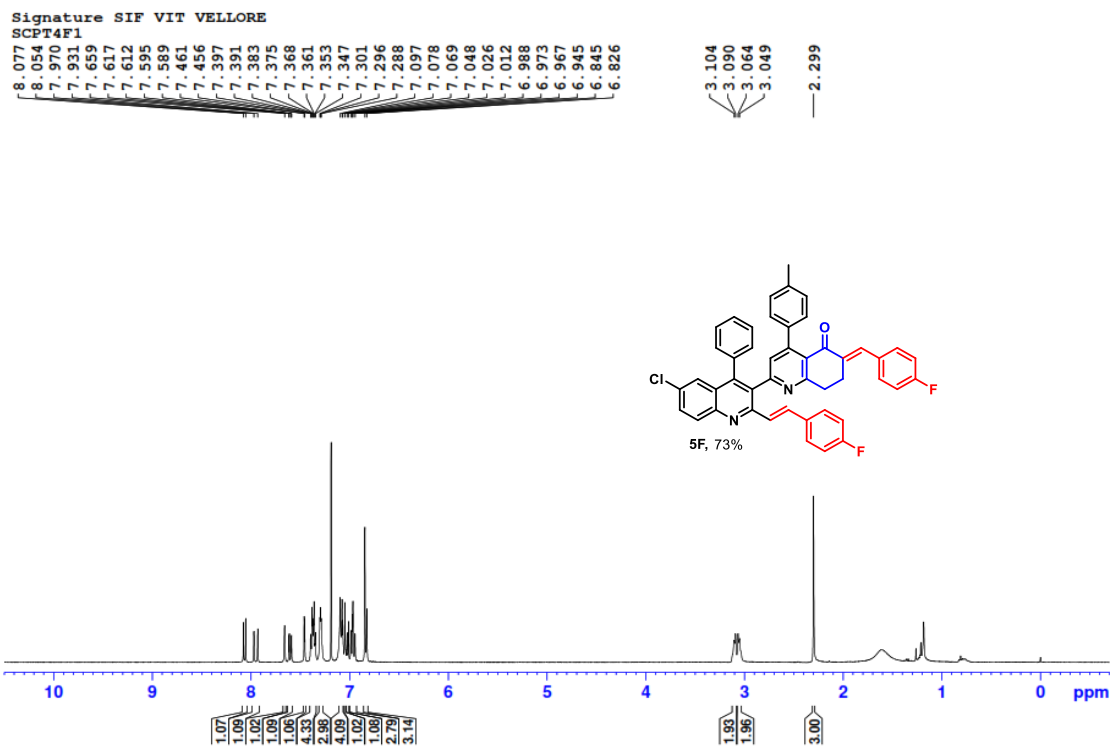

5F <sup>13</sup>C NMR (101 MHz, CDCl<sub>3</sub>)

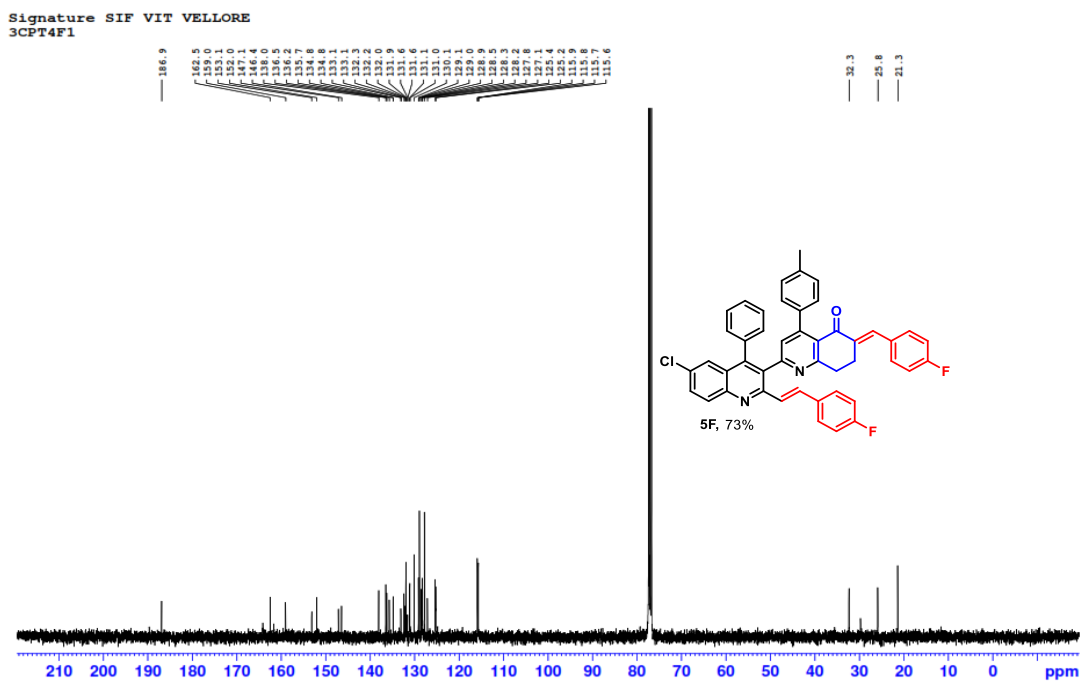

### 5F FTIR

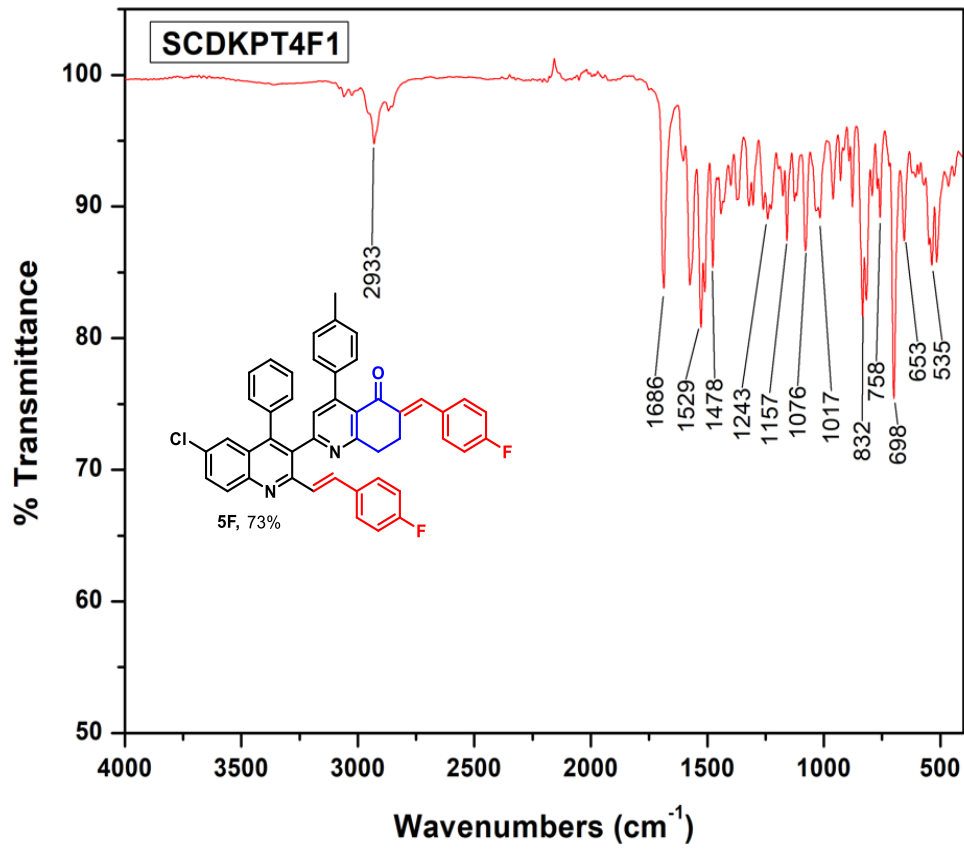

### 5F HRMS (ESI)

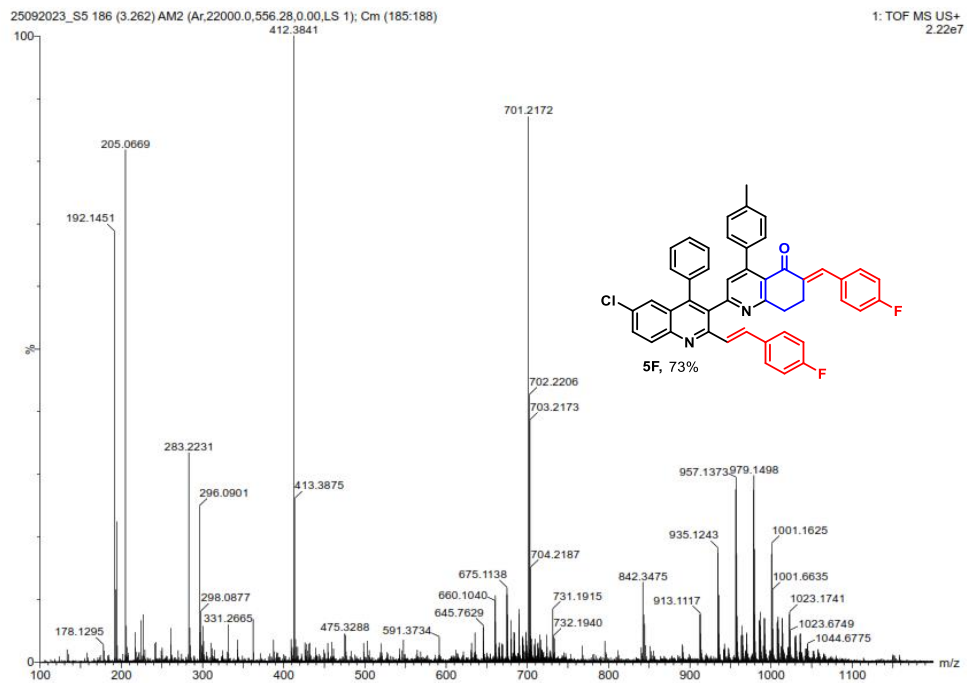

### 3. X-Ray Crystallography for Data 4D': (2264822)

Compound **4D'** crystals were grown from a solution consisting of  $\text{CDCl}_3$  and ethyl acetate at 25 °C. The X-ray diffraction data were collected utilizing D8- QUEST Single Crystal XRD diffractometer with X-ray intensity data were measured ( $\lambda = 0.71073 \text{ \AA}$ ). A crystal **4D'** with approximate dimensions of 0.100 mm x 0.140 mm x 0.193 mm, was employed for the X-ray crystallographic analysis.

#### ORTEP diagram:

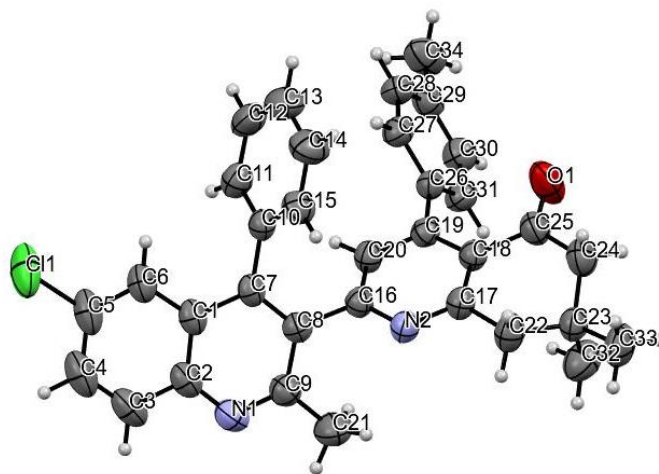

Fig S4 ORTEP diagram of the compound 4D'

#### Eclipsed diagram:

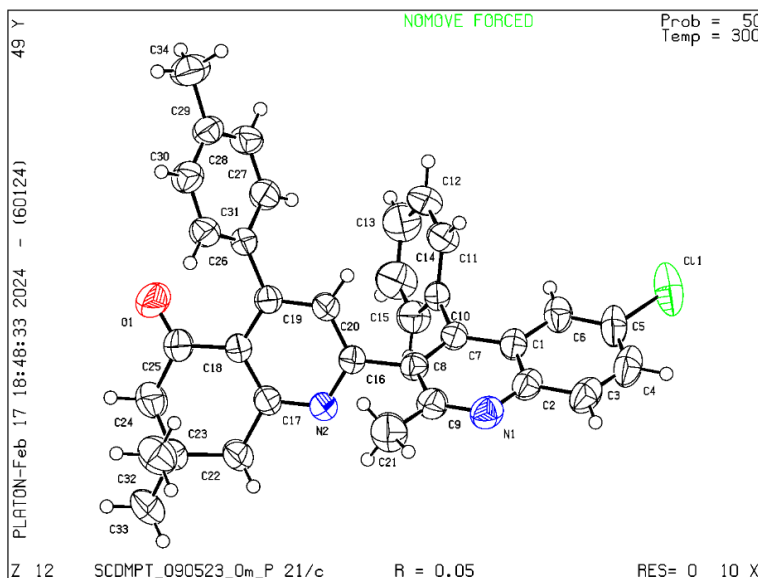

Fig S4 Eclipsed diagram of the compound 4D'

## Crystal Structure Report for 4D'

A specimen of  $C_{34}H_{29}ClN_2O$ , approximate dimensions 0.100 mm x 0.140 mm x 0.193 mm, was used for the X-ray crystallographic analysis. The X-ray intensity data were measured ( $\lambda = 0.71073 \text{ \AA}$ ).

**Table S2. Sample and crystal data for 4D'.**

|                        |                              |                            |
|------------------------|------------------------------|----------------------------|
| Identification code    | SCDMPT                       |                            |
| Chemical formula       | $C_{34}H_{29}ClN_2O$         |                            |
| Formula weight         | 517.04 g/mol                 |                            |
| Temperature            | 300(2) K                     |                            |
| Wavelength             | 0.71073 $\text{\AA}$         |                            |
| Crystal size           | 0.100 x 0.140 x 0.193 mm     |                            |
| Crystal system         | monoclinic                   |                            |
| Space group            | P 1 21/c 1                   |                            |
| Unit cell dimensions   | a = 13.6720(11) $\text{\AA}$ | $\alpha = 90^\circ$        |
|                        | b = 11.8313(9) $\text{\AA}$  | $\beta = 103.345(3)^\circ$ |
|                        | c = 17.7342(12) $\text{\AA}$ | $\gamma = 90^\circ$        |
| Volume                 | 2791.2(4) $\text{\AA}^3$     |                            |
| Z                      | 4                            |                            |
| Density (calculated)   | 1.230 g/cm <sup>3</sup>      |                            |
| Absorption coefficient | 0.166 mm <sup>-1</sup>       |                            |
| F(000)                 | 1088                         |                            |

**Table S3. Data collection and structure refinement for 4D'.**

|                                 |                                             |
|---------------------------------|---------------------------------------------|
| Theta range for data collection | 2.09 to 25.70°                              |
| Index ranges                    | -16<=h<=16, -14<=k<=14, -21<=l<=21          |
| Reflections collected           | 32805                                       |
| Independent reflections         | 5305 [R(int) = 0.0661]                      |
| Max. and min. transmission      | 0.9840 and 0.9690                           |
| Structure solution technique    | direct methods                              |
| Structure solution program      | SHELXT 2018/2 (Sheldrick, 2018)             |
| Refinement method               | Full-matrix least-squares on F <sup>2</sup> |
| Refinement program              | SHELXL-2018/3 (Sheldrick, 2018)             |

|                                            |                                                                                                       |
|--------------------------------------------|-------------------------------------------------------------------------------------------------------|
| <b>Function minimized</b>                  | $\Sigma w(F_o^2 - F_c^2)^2$                                                                           |
| <b>Data / restraints / parameters</b>      | 5305 / 0 / 347                                                                                        |
| <b>Goodness-of-fit on <math>F^2</math></b> | 1.030                                                                                                 |
| <b>Final R indices</b>                     | 2950<br>data; R1 = 0.0549, wR2 = 0.1147<br>$I > 2\sigma(I)$<br><br>all data R1 = 0.1192, wR2 = 0.1524 |
| <b>Weighting scheme</b>                    | $w = 1/[\sigma^2(F_o^2) + (0.0511P)^2 + 1.4451P]$<br>where $P = (F_o^2 + 2F_c^2)/3$                   |
| <b>Largest diff. peak and hole</b>         | 0.221 and -0.394 $e\text{\AA}^{-3}$                                                                   |
| <b>R.M.S. deviation from mean</b>          | 0.043 $e\text{\AA}^{-3}$                                                                              |

**Table S4. Atomic coordinates and equivalent isotropic atomic displacement parameters ( $\text{\AA}^2$ ) for 4D'.**

U(eq) is defined as one third of the trace of the orthogonalized  $U_{ij}$  tensor.

|     | <b>x/a</b>  | <b>y/b</b>  | <b>z/c</b>  | <b>U(eq)</b> |
|-----|-------------|-------------|-------------|--------------|
| C11 | 0.48103(7)  | 0.08011(10) | 0.24765(5)  | 0.1014(4)    |
| O1  | 0.05683(18) | 0.7240(2)   | 0.72289(15) | 0.0933(8)    |
| N1  | 0.53137(17) | 0.7053(2)   | 0.47000(14) | 0.0614(7)    |
| N2  | 0.26311(17) | 0.63032(18) | 0.54919(12) | 0.0500(6)    |
| C1  | 0.4319(2)   | 0.8662(2)   | 0.40976(14) | 0.0482(7)    |
| C2  | 0.5133(2)   | 0.7911(3)   | 0.41707(16) | 0.0542(7)    |
| C3  | 0.5816(2)   | 0.8064(3)   | 0.36855(18) | 0.0677(9)    |
| C4  | 0.5703(3)   | 0.8937(3)   | 0.31708(18) | 0.0747(10)   |
| C5  | 0.4909(2)   | 0.9684(3)   | 0.31169(16) | 0.0672(9)    |
| C6  | 0.4224(2)   | 0.9564(3)   | 0.35621(15) | 0.0576(8)    |
| C7  | 0.36111(19) | 0.8463(2)   | 0.45654(14) | 0.0436(6)    |
| C8  | 0.37823(19) | 0.7567(2)   | 0.50705(14) | 0.0449(6)    |
| C9  | 0.4670(2)   | 0.6892(2)   | 0.51417(16) | 0.0562(7)    |
| C10 | 0.27065(19) | 0.9196(2)   | 0.44884(14) | 0.0452(6)    |
| C11 | 0.2797(2)   | 0.0298(2)   | 0.47455(16) | 0.0603(8)    |
| C12 | 0.1953(3)   | 0.0959(3)   | 0.47019(19) | 0.0747(10)   |

|     |             |           |             |            |
|-----|-------------|-----------|-------------|------------|
| C13 | 0.1018(3)   | 0.0530(3) | 0.4384(2)   | 0.0848(11) |
| C14 | 0.0921(3)   | 0.9439(3) | 0.4119(2)   | 0.0827(10) |
| C15 | 0.1758(2)   | 0.8772(3) | 0.41754(17) | 0.0612(8)  |
| C16 | 0.30743(19) | 0.7318(2) | 0.55744(14) | 0.0449(6)  |
| C17 | 0.1972(2)   | 0.6080(2) | 0.59294(15) | 0.0485(7)  |
| C18 | 0.17264(19) | 0.6849(2) | 0.64554(14) | 0.0461(7)  |
| C19 | 0.22364(19) | 0.7893(2) | 0.65660(14) | 0.0452(6)  |
| C20 | 0.2907(2)   | 0.8106(2) | 0.61074(14) | 0.0480(7)  |
| C21 | 0.4921(2)   | 0.5994(3) | 0.57473(19) | 0.0806(10) |
| C22 | 0.1501(2)   | 0.4922(2) | 0.58065(16) | 0.0629(8)  |
| C23 | 0.1070(2)   | 0.4496(2) | 0.64696(16) | 0.0552(7)  |
| C24 | 0.0413(2)   | 0.5421(3) | 0.66715(19) | 0.0698(9)  |
| C25 | 0.0894(2)   | 0.6562(3) | 0.68366(17) | 0.0579(8)  |
| C26 | 0.21388(19) | 0.8780(2) | 0.71370(14) | 0.0442(6)  |
| C27 | 0.1815(2)   | 0.9850(2) | 0.68935(16) | 0.0546(7)  |
| C28 | 0.1823(2)   | 0.0706(2) | 0.74229(18) | 0.0595(8)  |
| C29 | 0.2173(2)   | 0.0531(2) | 0.82068(17) | 0.0545(7)  |
| C30 | 0.2494(2)   | 0.9467(2) | 0.84463(16) | 0.0587(8)  |
| C31 | 0.2480(2)   | 0.8601(2) | 0.79261(15) | 0.0552(7)  |
| C32 | 0.1915(3)   | 0.4225(3) | 0.71713(19) | 0.0822(10) |
| C33 | 0.0447(3)   | 0.3428(3) | 0.6219(2)   | 0.0810(10) |
| C34 | 0.2201(3)   | 0.1491(3) | 0.8771(2)   | 0.0818(10) |

**Table S5. Bond lengths (Å) for 4D'.**

|        |          |        |          |
|--------|----------|--------|----------|
| Cl1-C5 | 1.727(3) | O1-C25 | 1.211(3) |
| N1-C9  | 1.320(3) | N1-C2  | 1.366(4) |
| N2-C16 | 1.338(3) | N2-C17 | 1.344(3) |
| C1-C2  | 1.405(4) | C1-C6  | 1.415(4) |
| C1-C7  | 1.432(3) | C2-C3  | 1.420(4) |
| C3-C4  | 1.363(4) | C3-H3  | 0.930000 |
| C4-C5  | 1.387(5) | C4-H4  | 0.930000 |

|          |          |          |          |
|----------|----------|----------|----------|
| C5-C6    | 1.364(4) | C6-H6    | 0.930000 |
| C7-C8    | 1.373(3) | C7-C10   | 1.490(4) |
| C8-C9    | 1.434(4) | C8-C16   | 1.490(3) |
| C9-C21   | 1.493(4) | C10-C11  | 1.378(4) |
| C10-C15  | 1.382(4) | C11-C12  | 1.381(4) |
| C11-H11  | 0.930000 | C12-C13  | 1.370(5) |
| C12-H12  | 0.930000 | C13-C14  | 1.369(5) |
| C13-H13  | 0.930000 | C14-C15  | 1.375(4) |
| C14-H14  | 0.930000 | C15-H15  | 0.930000 |
| C16-C20  | 1.384(3) | C17-C18  | 1.398(3) |
| C17-C22  | 1.508(4) | C18-C19  | 1.410(4) |
| C18-C25  | 1.491(4) | C19-C20  | 1.382(3) |
| C19-C26  | 1.486(3) | C20-H20  | 0.930000 |
| C21-H21A | 0.960000 | C21-H21B | 0.960000 |
| C21-H21C | 0.960000 | C22-C23  | 1.518(4) |
| C22-H22A | 0.970000 | C22-H22B | 0.970000 |
| C23-C24  | 1.509(4) | C23-C32  | 1.524(4) |
| C23-C33  | 1.531(4) | C24-C25  | 1.501(4) |
| C24-H24A | 0.970000 | C24-H24B | 0.970000 |
| C26-C27  | 1.377(4) | C26-C31  | 1.386(4) |
| C27-C28  | 1.380(4) | C27-H27  | 0.930000 |
| C28-C29  | 1.378(4) | C28-H28  | 0.930000 |
| C29-C30  | 1.368(4) | C29-C34  | 1.508(4) |
| C30-C31  | 1.376(4) | C30-H30  | 0.930000 |
| C31-H31  | 0.930000 | C32-H32A | 0.960000 |
| C32-H32B | 0.960000 | C32-H32C | 0.960000 |
| C33-H33A | 0.960000 | C33-H33B | 0.960000 |
| C33-H33C | 0.960000 | C34-H34A | 0.960000 |
| C34-H34B | 0.960000 | C34-H34C | 0.960000 |

**Table S6. Bond angles (°) for 4D'.**

|             |            |             |            |
|-------------|------------|-------------|------------|
| C9-N1-C2    | 118.4(2)   | C16-N2-C17  | 117.4(2)   |
| C2-C1-C6    | 119.1(2)   | C2-C1-C7    | 118.0(2)   |
| C6-C1-C7    | 122.9(3)   | N1-C2-C1    | 123.2(2)   |
| N1-C2-C3    | 118.1(3)   | C1-C2-C3    | 118.8(3)   |
| C4-C3-C2    | 120.9(3)   | C4-C3-H3    | 119.600000 |
| C2-C3-H3    | 119.600000 | C3-C4-C5    | 119.7(3)   |
| C3-C4-H4    | 120.200000 | C5-C4-H4    | 120.200000 |
| C6-C5-C4    | 121.7(3)   | C6-C5-C11   | 120.0(3)   |
| C4-C5-C11   | 118.3(2)   | C5-C6-C1    | 119.9(3)   |
| C5-C6-H6    | 120.100000 | C1-C6-H6    | 120.100000 |
| C8-C7-C1    | 117.9(2)   | C8-C7-C10   | 121.5(2)   |
| C1-C7-C10   | 120.6(2)   | C7-C8-C9    | 120.1(2)   |
| C7-C8-C16   | 120.5(2)   | C9-C8-C16   | 119.4(2)   |
| N1-C9-C8    | 122.3(3)   | N1-C9-C21   | 117.1(3)   |
| C8-C9-C21   | 120.6(3)   | C11-C10-C15 | 118.7(3)   |
| C11-C10-C7  | 120.7(2)   | C15-C10-C7  | 120.5(2)   |
| C10-C11-C12 | 120.5(3)   | C10-C11-H11 | 119.800000 |
| C12-C11-H11 | 119.800000 | C13-C12-C11 | 120.1(3)   |
| C13-C12-H12 | 119.900000 | C11-C12-H12 | 119.900000 |
| C14-C13-C12 | 119.9(3)   | C14-C13-H13 | 120.100000 |
| C12-C13-H13 | 120.100000 | C13-C14-C15 | 120.2(3)   |
| C13-C14-H14 | 119.900000 | C15-C14-H14 | 119.900000 |
| C14-C15-C10 | 120.6(3)   | C14-C15-H15 | 119.700000 |
| C10-C15-H15 | 119.700000 | N2-C16-C20  | 122.5(2)   |
| N2-C16-C8   | 116.9(2)   | C20-C16-C8  | 120.6(2)   |
| N2-C17-C18  | 123.6(2)   | N2-C17-C22  | 114.6(2)   |
| C18-C17-C22 | 121.8(2)   | C17-C18-C19 | 118.4(2)   |
| C17-C18-C25 | 118.7(2)   | C19-C18-C25 | 122.8(2)   |
| C20-C19-C18 | 116.9(2)   | C20-C19-C26 | 116.6(2)   |
| C18-C19-C26 | 126.5(2)   | C19-C20-C16 | 121.0(2)   |
| C19-C20-H20 | 119.500000 | C16-C20-H20 | 119.500000 |



|               |            |               |            |
|---------------|------------|---------------|------------|
| C9-C21-H21A   | 109.500000 | C9-C21-H21B   | 109.500000 |
| H21A-C21-H21B | 109.500000 | C9-C21-H21C   | 109.500000 |
| H21A-C21-H21C | 109.500000 | H21B-C21-H21C | 109.500000 |
| C17-C22-C23   | 114.8(2)   | C17-C22-H22A  | 108.600000 |
| C23-C22-H22A  | 108.600000 | C17-C22-H22B  | 108.600000 |
| C23-C22-H22B  | 108.600000 | H22A-C22-H22B | 107.600000 |
| C24-C23-C22   | 107.6(2)   | C24-C23-C32   | 109.8(3)   |
| C22-C23-C32   | 110.2(3)   | C24-C23-C33   | 110.2(2)   |
| C22-C23-C33   | 109.8(2)   | C32-C23-C33   | 109.2(3)   |
| C25-C24-C23   | 116.2(2)   | C25-C24-H24A  | 108.200000 |
| C23-C24-H24A  | 108.200000 | C25-C24-H24B  | 108.200000 |
| C23-C24-H24B  | 108.200000 | H24A-C24-H24B | 107.400000 |
| O1-C25-C18    | 122.0(3)   | O1-C25-C24    | 120.4(3)   |
| C18-C25-C24   | 117.5(3)   | C27-C26-C31   | 117.8(2)   |
| C27-C26-C19   | 120.6(2)   | C31-C26-C19   | 121.2(2)   |
| C26-C27-C28   | 120.7(3)   | C26-C27-H27   | 119.700000 |
| C28-C27-H27   | 119.700000 | C29-C28-C27   | 121.5(3)   |
| C29-C28-H28   | 119.300000 | C27-C28-H28   | 119.300000 |
| C30-C29-C28   | 117.7(3)   | C30-C29-C34   | 122.0(3)   |
| C28-C29-C34   | 120.4(3)   | C29-C30-C31   | 121.6(3)   |
| C29-C30-H30   | 119.200000 | C31-C30-H30   | 119.200000 |
| C30-C31-C26   | 120.8(3)   | C30-C31-H31   | 119.600000 |
| C26-C31-H31   | 119.600000 | C23-C32-H32A  | 109.500000 |
| C23-C32-H32B  | 109.500000 | H32A-C32-H32B | 109.500000 |
| C23-C32-H32C  | 109.500000 | H32A-C32-H32C | 109.500000 |
| H32B-C32-H32C | 109.500000 | C23-C33-H33A  | 109.500000 |
| C23-C33-H33B  | 109.500000 | H33A-C33-H33B | 109.500000 |
| C23-C33-H33C  | 109.500000 | H33A-C33-H33C | 109.500000 |
| H33B-C33-H33C | 109.500000 | C29-C34-H34A  | 109.500000 |
| C29-C34-H34B  | 109.500000 | H34A-C34-H34B | 109.500000 |
| C29-C34-H34C  | 109.500000 | H34A-C34-H34C | 109.500000 |

**Table S7. Torsion angles (°) for 4D'.**

|                 |           |                 |           |
|-----------------|-----------|-----------------|-----------|
| C9-N1-C2-C1     | 2.9(4)    | C9-N1-C2-C3     | -178.6(2) |
| C6-C1-C2-N1     | 176.5(2)  | C7-C1-C2-N1     | -4.5(4)   |
| C6-C1-C2-C3     | -2.0(4)   | C7-C1-C2-C3     | 177.1(2)  |
| N1-C2-C3-C4     | -176.9(3) | C1-C2-C3-C4     | 1.6(4)    |
| C2-C3-C4-C5     | -0.3(5)   | C3-C4-C5-C6     | -0.7(5)   |
| C3-C4-C5-C11    | 178.3(2)  | C4-C5-C6-C1     | 0.3(4)    |
| C11-C5-C6-C1    | -178.7(2) | C2-C1-C6-C5     | 1.1(4)    |
| C7-C1-C6-C5     | -177.9(2) | C2-C1-C7-C8     | 1.5(3)    |
| C6-C1-C7-C8     | -179.5(2) | C2-C1-C7-C10    | -177.1(2) |
| C6-C1-C7-C10    | 1.9(4)    | C1-C7-C8-C9     | 2.6(4)    |
| C10-C7-C8-C9    | -178.8(2) | C1-C7-C8-C16    | 179.9(2)  |
| C10-C7-C8-C16   | -1.5(4)   | C2-N1-C9-C8     | 1.5(4)    |
| C2-N1-C9-C21    | -176.4(3) | C7-C8-C9-N1     | -4.4(4)   |
| C16-C8-C9-N1    | 178.4(2)  | C7-C8-C9-C21    | 173.5(3)  |
| C16-C8-C9-C21   | -3.8(4)   | C8-C7-C10-C11   | 110.8(3)  |
| C1-C7-C10-C11   | -70.7(3)  | C8-C7-C10-C15   | -67.6(3)  |
| C1-C7-C10-C15   | 111.0(3)  | C15-C10-C11-C12 | 1.0(4)    |
| C7-C10-C11-C12  | -177.3(3) | C10-C11-C12-C13 | -1.6(5)   |
| C11-C12-C13-C14 | 0.9(5)    | C12-C13-C14-C15 | 0.4(5)    |
| C13-C14-C15-C10 | -0.9(5)   | C11-C10-C15-C14 | 0.2(4)    |
| C7-C10-C15-C14  | 178.6(3)  | C17-N2-C16-C20  | 2.7(4)    |
| C17-N2-C16-C8   | -178.3(2) | C7-C8-C16-N2    | 120.3(3)  |
| C9-C8-C16-N2    | -62.4(3)  | C7-C8-C16-C20   | -60.7(3)  |
| C9-C8-C16-C20   | 116.6(3)  | C16-N2-C17-C18  | 0.3(4)    |
| C16-N2-C17-C22  | 180.0(2)  | N2-C17-C18-C19  | -3.6(4)   |
| C22-C17-C18-C19 | 176.8(2)  | N2-C17-C18-C25  | 172.6(2)  |
| C22-C17-C18-C25 | -7.0(4)   | C17-C18-C19-C20 | 3.7(4)    |
| C25-C18-C19-C20 | -172.3(2) | C17-C18-C19-C26 | -175.2(2) |

|                 |           |                 |           |
|-----------------|-----------|-----------------|-----------|
| C25-C18-C19-C26 | 8.9(4)    | C18-C19-C20-C16 | -0.9(4)   |
| C26-C19-C20-C16 | 178.0(2)  | N2-C16-C20-C19  | -2.4(4)   |
| C8-C16-C20-C19  | 178.6(2)  | N2-C17-C22-C23  | 158.8(2)  |
| C18-C17-C22-C23 | -21.5(4)  | C17-C22-C23-C24 | 49.5(3)   |
| C17-C22-C23-C32 | -70.1(3)  | C17-C22-C23-C33 | 169.5(3)  |
| C22-C23-C24-C25 | -53.3(3)  | C32-C23-C24-C25 | 66.7(3)   |
| C33-C23-C24-C25 | -173.0(3) | C17-C18-C25-O1  | -171.5(3) |
| C19-C18-C25-O1  | 4.4(4)    | C17-C18-C25-C24 | 4.1(4)    |
| C19-C18-C25-C24 | -179.9(3) | C23-C24-C25-O1  | -156.5(3) |
| C23-C24-C25-C18 | 27.8(4)   | C20-C19-C26-C27 | 61.1(3)   |
| C18-C19-C26-C27 | -120.1(3) | C20-C19-C26-C31 | -111.1(3) |
| C18-C19-C26-C31 | 67.7(4)   | C31-C26-C27-C28 | -0.7(4)   |
| C19-C26-C27-C28 | -173.3(3) | C26-C27-C28-C29 | 1.6(4)    |
| C27-C28-C29-C30 | -1.6(4)   | C27-C28-C29-C34 | 178.2(3)  |
| C28-C29-C30-C31 | 0.8(4)    | C34-C29-C30-C31 | -179.0(3) |
| C29-C30-C31-C26 | 0.0(4)    | C27-C26-C31-C30 | -0.1(4)   |
| C19-C26-C31-C30 | 172.4(3)  |                 |           |

**Table S8. Anisotropic atomic displacement parameters ( $\text{\AA}^2$ ) for 4D'.**

The anisotropic atomic displacement factor exponent takes the form:  $-2\pi^2 [ h^2 a^{*2} U_{11} + \dots + 2 h k a^* b^* U_{12} ]$

|     | $U_{11}$   | $U_{22}$   | $U_{33}$   | $U_{23}$    | $U_{13}$   | $U_{12}$    |
|-----|------------|------------|------------|-------------|------------|-------------|
| Cl1 | 0.0916(7)  | 0.1387(9)  | 0.0777(6)  | 0.0373(6)   | 0.0274(5)  | -0.0276(6)  |
| O1  | 0.0937(18) | 0.0846(17) | 0.123(2)   | -0.0346(15) | 0.0686(16) | -0.0255(14) |
| N1  | 0.0516(15) | 0.0656(17) | 0.0690(16) | -0.0064(14) | 0.0183(13) | 0.0013(13)  |
| N2  | 0.0594(15) | 0.0448(14) | 0.0485(13) | -0.0012(10) | 0.0177(11) | -0.0058(11) |
| C1  | 0.0460(16) | 0.0588(18) | 0.0404(15) | -0.0067(13) | 0.0111(13) | -0.0132(14) |
| C2  | 0.0476(17) | 0.065(2)   | 0.0514(17) | -0.0137(15) | 0.0150(14) | -0.0097(15) |
| C3  | 0.0513(19) | 0.089(2)   | 0.069(2)   | -0.0206(19) | 0.0253(16) | -0.0086(17) |
| C4  | 0.063(2)   | 0.108(3)   | 0.060(2)   | -0.013(2)   | 0.0279(17) | -0.025(2)   |
| C5  | 0.060(2)   | 0.097(2)   | 0.0477(17) | 0.0022(16)  | 0.0179(15) | -0.0264(19) |

|     |            |            |            |             |            |             |
|-----|------------|------------|------------|-------------|------------|-------------|
| C6  | 0.0511(17) | 0.072(2)   | 0.0504(16) | 0.0011(15)  | 0.0129(14) | -0.0122(15) |
| C7  | 0.0423(15) | 0.0477(16) | 0.0415(14) | -0.0072(12) | 0.0109(12) | -0.0097(12) |
| C8  | 0.0457(16) | 0.0463(16) | 0.0430(14) | -0.0047(13) | 0.0109(12) | -0.0040(13) |
| C9  | 0.0554(19) | 0.0559(18) | 0.0585(18) | -0.0019(14) | 0.0155(15) | -0.0007(15) |
| C10 | 0.0484(17) | 0.0470(17) | 0.0430(14) | 0.0018(12)  | 0.0161(12) | -0.0042(13) |
| C11 | 0.070(2)   | 0.0486(18) | 0.0625(18) | 0.0005(15)  | 0.0164(16) | -0.0060(16) |
| C12 | 0.103(3)   | 0.0424(18) | 0.085(2)   | 0.0062(16)  | 0.034(2)   | 0.007(2)    |
| C13 | 0.075(3)   | 0.078(3)   | 0.106(3)   | 0.019(2)    | 0.029(2)   | 0.026(2)    |
| C14 | 0.052(2)   | 0.078(3)   | 0.115(3)   | 0.000(2)    | 0.0143(19) | 0.0053(19)  |
| C15 | 0.0480(19) | 0.0608(19) | 0.075(2)   | -0.0042(16) | 0.0149(16) | -0.0033(15) |
| C16 | 0.0491(16) | 0.0449(16) | 0.0422(14) | 0.0003(12)  | 0.0134(12) | -0.0018(13) |
| C17 | 0.0537(17) | 0.0464(16) | 0.0463(15) | 0.0016(13)  | 0.0135(13) | -0.0064(13) |
| C18 | 0.0504(16) | 0.0452(16) | 0.0444(15) | 0.0018(12)  | 0.0149(13) | -0.0031(13) |
| C19 | 0.0505(16) | 0.0433(16) | 0.0417(14) | 0.0013(12)  | 0.0105(12) | 0.0010(13)  |
| C20 | 0.0541(17) | 0.0442(16) | 0.0472(15) | -0.0019(12) | 0.0150(13) | -0.0075(13) |
| C21 | 0.074(2)   | 0.079(2)   | 0.090(2)   | 0.021(2)    | 0.0235(19) | 0.0204(19)  |
| C22 | 0.077(2)   | 0.0535(18) | 0.0605(18) | -0.0040(15) | 0.0212(16) | -0.0177(16) |
| C23 | 0.0593(18) | 0.0504(18) | 0.0586(18) | 0.0030(14)  | 0.0191(15) | -0.0086(14) |
| C24 | 0.062(2)   | 0.067(2)   | 0.087(2)   | 0.0006(17)  | 0.0285(18) | -0.0135(17) |
| C25 | 0.0535(18) | 0.0602(19) | 0.0639(19) | -0.0012(15) | 0.0216(15) | -0.0043(15) |
| C26 | 0.0457(16) | 0.0415(16) | 0.0477(15) | 0.0006(12)  | 0.0154(12) | -0.0021(12) |
| C27 | 0.0599(18) | 0.0500(18) | 0.0544(16) | 0.0074(14)  | 0.0144(14) | 0.0080(14)  |
| C28 | 0.0626(19) | 0.0435(17) | 0.075(2)   | 0.0017(15)  | 0.0223(16) | 0.0081(14)  |
| C29 | 0.0507(17) | 0.0532(19) | 0.0633(19) | -0.0125(15) | 0.0207(14) | -0.0040(14) |
| C30 | 0.068(2)   | 0.061(2)   | 0.0476(17) | -0.0030(15) | 0.0123(14) | 0.0017(16)  |
| C31 | 0.067(2)   | 0.0467(17) | 0.0524(17) | 0.0053(14)  | 0.0148(15) | 0.0063(14)  |
| C32 | 0.088(3)   | 0.073(2)   | 0.079(2)   | 0.0145(19)  | 0.006(2)   | -0.0015(19) |
| C33 | 0.092(3)   | 0.060(2)   | 0.095(3)   | 0.0020(18)  | 0.031(2)   | -0.0254(19) |
| C34 | 0.083(2)   | 0.072(2)   | 0.095(3)   | -0.031(2)   | 0.030(2)   | -0.0067(19) |

**Table S9. Hydrogen atomic coordinates and isotropic atomic displacement parameters ( $\text{\AA}^2$ ) for 4D<sup>+</sup>.**

|      | x/a     | y/b    | z/c    | U(eq)    |
|------|---------|--------|--------|----------|
| H3   | 0.6348  | 0.7561 | 0.3719 | 0.081000 |
| H4   | 0.6157  | 0.9031 | 0.2858 | 0.090000 |
| H6   | 0.3696  | 1.0075 | 0.3514 | 0.069000 |
| H11  | 0.3431  | 1.0600 | 0.4950 | 0.072000 |
| H12  | 0.2020  | 1.1696 | 0.4889 | 0.090000 |
| H13  | 0.0451  | 1.0978 | 0.4348 | 0.102000 |
| H14  | 0.0286  | 0.9149 | 0.3901 | 0.099000 |
| H15  | 0.1685  | 0.8029 | 0.4001 | 0.073000 |
| H20  | 0.3252  | 0.8790 | 0.6158 | 0.058000 |
| H21A | 0.4924  | 0.6313 | 0.6245 | 0.121000 |
| H21B | 0.5572  | 0.5687 | 0.5752 | 0.121000 |
| H21C | 0.4427  | 0.5403 | 0.5634 | 0.121000 |
| H22A | 0.2004  | 0.4389 | 0.5723 | 0.075000 |
| H22B | 0.0967  | 0.4937 | 0.5339 | 0.075000 |
| H24A | -0.0173 | 0.5497 | 0.6246 | 0.084000 |
| H24B | 0.0179  | 0.5183 | 0.7123 | 0.084000 |
| H27  | 0.1590  | 0.9997 | 0.6367 | 0.065000 |
| H28  | 0.1585  | 1.1418 | 0.7247 | 0.071000 |
| H30  | 0.2726  | 0.9326 | 0.8973 | 0.070000 |
| H31  | 0.2702  | 0.7886 | 0.8107 | 0.066000 |
| H32A | 0.1633  | 0.3985 | 0.7593 | 0.123000 |
| H32B | 0.2318  | 0.4888 | 0.7322 | 0.123000 |
| H32C | 0.2326  | 0.3632 | 0.7041 | 0.123000 |
| H33A | 0.0181  | 0.3159 | 0.6642 | 0.122000 |
| H33B | 0.0866  | 0.2856 | 0.6074 | 0.122000 |
| H33C | -0.0096 | 0.3600 | 0.5785 | 0.122000 |
| H34A | 0.2316  | 1.1195 | 0.9288 | 0.123000 |
| H34B | 0.1571  | 1.1886 | 0.8649 | 0.123000 |
| H34C | 0.2734  | 1.2002 | 0.8735 | 0.123000 |
